# Supplementary material
Source: PubMed Central journal article supplement (PMC5898231)
Supplement: NIHMS953748-supplement-supplement_1.pdf [file NIHMS953748-supplement-supplement_1.pdf]

## SUPPLEMENTARY ONLINE DATA

## The basic building blocks and evolution of CRISPR–Cas systems

Kira S. Makarova\*<sup>1</sup>, Yuri I. Wolf\* and Eugene V. Koonin\*

\*National Center for Biotechnology Information, NLM, National Institutes of Health, Bethesda, MD 20894, U.S.A.

**Table S1** | Gene neighbourhoods used for assignments of Cas1 proteins to the CRISPR–Cas subtypes

| Cas1 GI number | Organism                                                   | Automatically assigned CRISPR–Cas system (CAS) subtype | CRISPR–Cas-related gene neighbours (1, 2, 3, 4, 5, 6, 7, 8, 9 and 10 are respective <i>cas</i> genes) |
|----------------|------------------------------------------------------------|--------------------------------------------------------|-------------------------------------------------------------------------------------------------------|
| 384117649      | <i>Acetobacter_pasteurianus</i> _IFO_3283_01_42C_uid158377 | CAS-I-E                                                | 3 + 3HD-8e-cse2SS-7-5-6e-1-2                                                                          |
| 258513018      | <i>Acetobacter_pasteurianus</i> _IFO_3283_01_uid59279      | CAS-I-E                                                | 3 + 3HD-8e-cse2SS-7-5-6e-1-2                                                                          |
| 384049465      | <i>Acetobacter_pasteurianus</i> _IFO_3283_03_uid158373     | CAS-I-E                                                | 3 + 3HD-8e-cse2SS-7-5-6e-1-2                                                                          |
| 384055396      | <i>Acetobacter_pasteurianus</i> _IFO_3283_07_uid158381     | CAS-I-E                                                | 3 + 3HD-8e-cse2SS-7-5-6e-1-2                                                                          |
| 384043999      | <i>Acetobacter_pasteurianus</i> _IFO_3283_12_uid158379     | CAS-I-E                                                | 3 + 3HD-8e-cse2SS-7-5-6e-1-2                                                                          |
| 384055813      | <i>Acetobacter_pasteurianus</i> _IFO_3283_22_uid158383     | CAS-I-E                                                | 3 + 3HD-8e-cse2SS-7-5-6e-1-2                                                                          |
| 384061324      | <i>Acetobacter_pasteurianus</i> _IFO_3283_26_uid158531     | CAS-I-E                                                | 3 + 3HD-8e-cse2SS-7-5-6e-1-2                                                                          |
| 384061684      | <i>Acetobacter_pasteurianus</i> _IFO_3283_32_uid158375     | CAS-I-E                                                | 3 + 3HD-8e-cse2SS-7-5-6e-1-2                                                                          |
| 379012740      | <i>Acetobacterium_woodii</i> _DSM_1030_uid88073            | CAS-I-B                                                | 2-1-4-3-5-7-8-6                                                                                       |
| 302391602      | <i>Acetohalobium_arabaticum</i> _DSM_5501_uid51423         | CAS-I-D                                                | 10d-csc2g7-csc1g5-3-4-1-2-6                                                                           |
| 284048125      | <i>Acidaminococcus_fermentans</i> _DSM_20731_uid43471      | CAS-I-C                                                | 3 + 3HD-5-8c-7-4-1-2                                                                                  |
| 352684362      | <i>Acidaminococcus_intestini</i> _RyC_MR95_uid74445        | CAS-II-A                                               | 9-1-2-csn2                                                                                            |
| 332796067      | <i>Acidianus_hospitalis</i> _W1_uid66875                   | CAS-III-A                                              | csm3g7-csm3g7-x-x-4-x-x-x-x-2-1-6                                                                     |
| 332797424      | <i>Acidianus_hospitalis</i> _W1_uid66875                   | CAS-I-A                                                | 6-csaXg8-3HD-3-5-7-csa5SS-R-4-1-2-4-R                                                                 |
| 302347808      | <i>Acidilobus_saccharovorans</i> _345_15_uid51395          | CAS-III-B                                              | 6-x-4-2-1-4-cmr3g5-10-cmr6g7-csm3g7-cmr5SS-cmr4g7-csm6-x-csm6                                         |
| 256371771      | <i>Acidimicrobium_ferrooxidans</i> _DSM_10331_uid59215     | CAS-I-E                                                | 2-1-6e-5-7-cse2SS-8e-3 + 3HD                                                                          |
| 148243835      | <i>Acidiphilium_cryptum</i> _JF_5_uid58447                 | CAS-I-E                                                | 3 + 3HD-8e-cse2SS-7-5-6e-1                                                                            |
| 148260802      | <i>Acidiphilium_cryptum</i> _JF_5_uid58447                 | CAS-I-E                                                | 1-6e-5-7-cse2SS-8e-3                                                                                  |
| 225872438      | <i>Acidobacterium_capsulatum</i> _ATCC_51196_uid59127      | CAS-I-C                                                | 2-1-4-7-8c-5-x-3 + 3HD                                                                                |
| 117929157      | <i>Acidotherrmus_cellulolyticus</i> _11B_uid58501          | CAS-II                                                 | 2-1-9                                                                                                 |
| 121592920      | <i>Acidovorax_JS42</i> _uid58427                           | CAS-I-F                                                | 6f-7f-5f-8f-3f-1                                                                                      |
| 326315086      | <i>Acidovorax_avenae</i> _ATCC_19860_uid42497              | CAS-II                                                 | 9-1-2                                                                                                 |
| 326318659      | <i>Acidovorax_avenae</i> _ATCC_19860_uid42497              | CAS-I-C                                                | 3 + 3HD-5-8c-7-4-1-2                                                                                  |
| 222109284      | <i>Acidovorax_ebreus</i> _TPSY_uid59233                    | CAS-II                                                 | 2-1-9                                                                                                 |
| 432329386      | <i>Aciduliprofundum_MAR08_339</i> _uid184407               | CAS-I-B                                                | 2-1-4-3 + 3HD-5-7-x-6                                                                                 |
| 289596068      | <i>Aciduliprofundum_boonei</i> _T469_uid43333              | Unknown                                                | 1                                                                                                     |

<sup>1</sup>To whom correspondence should be addressed (email makarova@ncbi.nlm.nih.gov).

Table S1 | Continued

| Cas1 GI number | Organism                                                | Automatically assigned CRISPR-Cas system (CAS) subtype | CRISPR-Cas-related gene neighbours (1, 2, 3, 4, 5, 6, 7, 8, 9 and 10 are respective <i>cas</i> genes) |
|----------------|---------------------------------------------------------|--------------------------------------------------------|-------------------------------------------------------------------------------------------------------|
| 289596694      | Aciduliprofundum_boonei_T469_uid43333                   | CAS-III-A                                              | 2-1-4-6-csx1-csx1-csm5g7-csm4g5-csm3g7-csm2SS-10                                                      |
| 50085564       | Acinetobacter_ADP1_uid61597                             | CAS-I-F                                                | 3f-x-8f-5f-7f-6f-1                                                                                    |
| 213158189      | Acinetobacter_baumannii_AB0057_uid59083                 | CAS-I-F                                                | 6f-7f-5f-8f-3f-1                                                                                      |
| 215482695      | Acinetobacter_baumannii_AB307_0294_uid59271             | CAS-I-F                                                | 1-3f-8f-5f-7f-6f                                                                                      |
| 169795149      | Acinetobacter_baumannii_AYE_uid61637                    | CAS-I-F                                                | 1-3f-8f-5f-7f-6f                                                                                      |
| 165975670      | Actinobacillus_pleuropneumoniae_serovar_3_JL03_uid58891 | CAS-I-F                                                | 3f-1-6f-7f-5f-8f                                                                                      |
| 126207702      | Actinobacillus_pleuropneumoniae_serovar_5b_L20_uid58789 | CAS-I-F                                                | 3f-1-6f-7f-5f-8f                                                                                      |
| 190149485      | Actinobacillus_pleuropneumoniae_serovar_7_AP76_uid59231 | CAS-I-F                                                | 3f-1-6f-7f-5f-8f                                                                                      |
| 152978061      | Actinobacillus_succinogenes_130Z_uid58247               | CAS-II                                                 | 9-1-2                                                                                                 |
| 152978958      | Actinobacillus_succinogenes_130Z_uid58247               | CAS-I-C                                                | 3-5-8c-7-4-x-x-x-1-2                                                                                  |
| 407692092      | Actinobacillus_suis_H91_0380_uid176363                  | CAS-II                                                 | 9-1-2                                                                                                 |
| 118431380      | Aeropyrum_pernix_K1_uid57757                            | CAS-I-A                                                | 6-8a2-3HD-3-5-7-csa5SS-R-4-2-1-4                                                                      |
| 365967615      | Aggregatibacter_actinomycetemcomitans_ANH9381_uid80743  | CAS-I-C                                                | 3-7-4 + x-1-2                                                                                         |
| 261867834      | Aggregatibacter_actinomycetemcomitans_D11S_1_uid41333   | CAS-I-C                                                | 3-4-x-1-2                                                                                             |
| 387120005      | Aggregatibacter_actinomycetemcomitans_D7S_1_uid46989    | CAS-I-C                                                | 2-1-x-4-7-8c-5-3                                                                                      |
| 387120332      | Aggregatibacter_actinomycetemcomitans_D7S_1_uid46989    | CAS-I-F                                                | 8f-5f-7f-6f-3f-1                                                                                      |
| 251792131      | Aggregatibacter_aphrophilus_NJ8700_uid59407             | CAS-I-C                                                | 3 + 3HD-x-5-8c-7-4-x-1-2                                                                              |
| 187736488      | Akkermansia_muciniphila_ATCC_BAA_835_uid58985           | CAS-II                                                 | 2-1-9                                                                                                 |
| 319760941      | Alicyclophilus_denitrificans_BC_uid49953                | CAS-II                                                 | 9-1-2                                                                                                 |
| 330822846      | Alicyclophilus_denitrificans_K601_uid66307              | CAS-II                                                 | 9-1-2                                                                                                 |
| 258512610      | Alicyclobacillus_acidocaldarius_DSM_446_uid59199        | CAS-I-U                                                | csb2-7-8x1-3-2-1-4                                                                                    |
| 384136648      | Alicyclobacillus_acidocaldarius_Tc_4_1_uid158681        | CAS-I-U                                                | csb2-7-8x1-3-2-1-4                                                                                    |
| 114320110      | Alkalilimnicola_ehrlichii_MLHE_1_uid58467               | CAS-I-E                                                | 2-1-5-7-cse2SS-8e-3 + 3HD                                                                             |
| 150389454      | Alkaliphilus_metalliredigens_QYMF_uid58171              | CAS-I-C                                                | 3-5-8c-7-4-1-2                                                                                        |
| 150389964      | Alkaliphilus_metalliredigens_QYMF_uid58171              | CAS-I-B                                                | 6-8 + 8a1-7-5-3-4-1-2                                                                                 |
| 288940388      | Allochrotaium_vinosum_DSM_180_uid46083                  | CAS-I-E                                                | 2-1-x-6e-5-7-cse2SS-x-8e-x-3 + 3HD                                                                    |
| 288947693      | Allochrotaium_vinosum_DSM_180_uid46083                  | CAS-III-U                                              | csx1-x-csx16-x-2-2-1                                                                                  |
| 332142270      | Alteromonas_macleodii_Deep_ecotype_uid58251             | CAS-I-E                                                | 2-1-x-6e-5-7-cse2SS-8e-3                                                                              |
| 294101137      | Aminobacterium_colombiense_DSM_12261_uid47083           | CAS-I                                                  | 2-1 + 4-5-7-x-3 + 3HD-6                                                                               |
| 260892568      | Ammonifex_degensii_KC4_uid41053                         | CAS-I-B                                                | 1-2                                                                                                   |
| 260893609      | Ammonifex_degensii_KC4_uid41053                         | CAS-I-D                                                | 4-4-2-1-x-x-x-x-csc2g7-x-x-3HD-3                                                                      |
| 414079085      | Anabaena_90_uid179383                                   | CAS-I-D                                                | 2-1-4-x-6-x-csc1g5-csc2g7-10d                                                                         |
| 440681127      | Anabaena_cylindrica_PCC_7122_uid183339                  | CAS-I-D                                                | 2-1-4-6-x-csc1g5-csc2g7-10d-x-x-x-3                                                                   |
| 440685092      | Anabaena_cylindrica_PCC_7122_uid183339                  | CAS-III-A                                              | 5g10-csm3g7-x-csm3g7-x-x-7-x-6-4-1-2                                                                  |
| 440685177      | Anabaena_cylindrica_PCC_7122_uid183339                  | CAS-III-B                                              | 1 + x-1-x-2-x-x-x-x-10-cmr3g5-cmr4g7                                                                  |
| 440685178      | Anabaena_cylindrica_PCC_7122_uid183339                  | CAS-III-B                                              | 1 + x-1-x-2-x-x-x-x-10-cmr3g5-cmr4g7                                                                  |
| 440685228      | Anabaena_cylindrica_PCC_7122_uid183339                  | CAS-III-B                                              | cmr1g7 + cmr6g7-x-cmr4g7-cmr3g5-10-x-2-1                                                              |
| 75910374       | Anabaena_variabilis_ATCC_29413_uid58043                 | CAS-I-D                                                | 10d-csc2g7-csc1g5-20G-6-4-1-2                                                                         |
| 392407912      | Anaerobaculum_mobile_DSM_13181_uid168323                | CAS-I-B                                                | 1-4-3 + x-5-x-x-8a1-6                                                                                 |
| 320160633      | Anaerolinea_thermophila_UNI_1_uid62245                  | CAS-I-C                                                | 2-1-4-7-8c-5-3 + 3HD                                                                                  |
| 320161859      | Anaerolinea_thermophila_UNI_1_uid62245                  | CAS-III-A                                              | csx1-10-csm2SS-csm3g7-csm4g5-csm5g7-csx1-csx1-csx15-6-1-2                                             |

Table S1 | Continued

| Cas1 GI number | Organism                                              | Automatically assigned CRISPR-Cas system (CAS) subtype | CRISPR-Cas-related gene neighbours (1, 2, 3, 4, 5, 6, 7, 8, 9 and 10 are respective <i>cas</i> genes) |
|----------------|-------------------------------------------------------|--------------------------------------------------------|-------------------------------------------------------------------------------------------------------|
| 320162242      | Anaerolinea_thermophila_UNI_1_uid62245                | CAS-III-B                                              | 4-2-1-6-3 + 3HD-5-7-8a1-csx15-csx1 + x-cmr6g7-cmr5SS-cmr4g7                                           |
| 197121198      | Anaeromyxobacter_K_uid58953                           | CAS-I-E                                                | 3 + 3HD-8e-cse2SS-7-5-6e-1-2                                                                          |
| 220915900      | Anaeromyxobacter_dehalogenans_2CP_1_uid58989          | CAS-I-E                                                | 3 + 3HD-8e-cse2SS-7-5-6e-1-2                                                                          |
| 212638614      | Anoxybacillus_flavithermus_WK1_uid59135               | CAS-I-B                                                | 6-8a1-7-5-3 + 3HD-4-1-2                                                                               |
| 15605875       | Aquifex_aeolicus_VF5_uid57765                         | CAS-I                                                  | DinG-x-x-x-x-x-x-x-1-4-3-8a1-5-7-x-csx3-csm6-cmr6g7-cmr4g7                                            |
| 297572289      | Arcanobacterium_haemolyticum_DSM_20595_uid49489       | CAS-I-E                                                | 5-7-cse2SS-8e-6e-3 + 3HD-1-2                                                                          |
| 11499462       | Archaeoglobus_fulgidus_DSM_4304_uid57717              | CAS-I-A                                                | cmr1g7-csa3-csa5SS-7-5-csa8a2-3-3HD-2-4-1-4                                                           |
| 11500011       | Archaeoglobus_fulgidus_DSM_4304_uid57717              | CAS-I-B                                                | 2-1-4                                                                                                 |
| 327400671      | Archaeoglobus_veneficus_SNP6_uid65269                 | CAS-I-A                                                | 3-5-7-8a1-6-2-1-4                                                                                     |
| 384172708      | Arcobacter_L_uid158135                                | CAS-I                                                  | 2-1-4-3-5-7-8a1-x-6                                                                                   |
| 296274322      | Arcobacter_nitrofigilis_DSM_7299_uid49001             | CAS-I-B                                                | 6-x-7-5-3 + 3HD-x-4-1-2                                                                               |
| 56477284       | Aromatoleum_aromaticum_EbN1_uid58231                  | CAS-I-C                                                | 1-4-x-7-8c-5-3                                                                                        |
| 288957740      | Azospirillum_B510_uid46085                            | CAS-II                                                 | 2-1-9                                                                                                 |
| 288957883      | Azospirillum_B510_uid46085                            | CAS-III-A                                              | csm3g7-csm3g7-csm3g7-6-2-1 + RT                                                                       |
| 288959585      | Azospirillum_B510_uid46085                            | CAS-I-U                                                | csb1-csb2-3-x-x-x-1 + 4-2                                                                             |
| 374998939      | Azospirillum_lipoferum_4B_uid82343                    | CAS-III-B                                              | 2-1 + RT-x-csm3g7-x-x-x-cmr1g7-10-cmr3g5-cmr4g7-cmr5SS                                                |
| 374292449      | Azospirillum_lipoferum_4B_uid82343                    | CAS-I-U                                                | 3-8x1-7-5b6-1 + 4-2                                                                                   |
| 226945223      | Azotobacter_vinelandii_DJ_uid57597                    | CAS-I-C                                                | 2-1-4-7-8c-5-3                                                                                        |
| 56965354       | Bacillus_clausii_KSM_K16_uid58237                     | CAS-I-C                                                | 2-1-4-7-8c-5-3                                                                                        |
| 336115128      | Bacillus_coagulans_2_6_uid68053                       | CAS-I-B                                                | 1-4-3 + 3HD-5-x-x-6                                                                                   |
| 347752339      | Bacillus_coagulans_36D1_uid54335                      | CAS-I-B                                                | 6-x-x-5-3 + 3HD-4-1-x-1-2                                                                             |
| 15612904       | Bacillus_halodurans_C_125_uid57791                    | CAS-I-C                                                | cmr5SS-cmr6g7-x-x-x-3-5-8c-7-4-1-2                                                                    |
| 375360192      | Bacteroides_fragilis_638R_uid84217                    | CAS-II                                                 | 1-9                                                                                                   |
| 60683388       | Bacteroides_fragilis_NCTC_9343_uid57639               | CAS-II                                                 | 2-1-9                                                                                                 |
| 53713835       | Bacteroides_fragilis_YCH46_uid58195                   | CAS-I-B                                                | 2-1-4-7-x-3 + 3HD-x-6                                                                                 |
| 319902868      | Bacteroides_helcogenes_P_36_108_uid62135              | CAS-I-C                                                | 2-1-4-7-8c-5-3 + 3HD                                                                                  |
| 390944705      | Belliella_baltica_DSM_15883_uid168182                 | CAS-II                                                 | 6-2-1-x-9                                                                                             |
| 119026198      | Bifidobacterium_adolescentis_ATCC_15703_uid58559      | CAS-I-C                                                | 2-1-4-7-8c-8c-5-3 + 3HD                                                                               |
| 386867543      | Bifidobacterium_animalis_ATCC_25527_uid162513         | CAS-I-E                                                | 2-1-6e-5-7-cse2SS-8e-3 + 3HD                                                                          |
| 219683006      | Bifidobacterium_animalis_lactis_AD011_uid58911        | CAS-I-U                                                | 3-csb1-1 + 4                                                                                          |
| 387821196      | Bifidobacterium_animalis_lactis_B420_uid163691        | CAS-I-U                                                | csb3-3-5b6-csb1-2-1 + 4                                                                               |
| 384189957      | Bifidobacterium_animalis_lactis_BB_12_uid158871       | CAS-I-U                                                | csb3-3-5b6-csb1-x-1 + 4                                                                               |
| 384194324      | Bifidobacterium_animalis_lactis_BLC1_uid158867        | CAS-I-U                                                | csb3-3-5b6-csb1-2-1 + 4                                                                               |
| 387822880      | Bifidobacterium_animalis_lactis_Bi_07_uid163693       | CAS-I-U                                                | csb3-3-5b6-csb1-2-1 + 4                                                                               |
| 241191326      | Bifidobacterium_animalis_lactis_Bl_04_uid59359        | CAS-I-U                                                | csb3-3-5b6-csb1-2-1 + 4                                                                               |
| 384192748      | Bifidobacterium_animalis_lactis_CNCM_I_2494_uid158869 | CAS-I-U                                                | csb3-3-5b6-csb1-x-1 + 4                                                                               |
| 241196732      | Bifidobacterium_animalis_lactis_DSM_10140_uid59357    | CAS-I-U                                                | csb3-3-5b6-csb1-2-1 + 4                                                                               |
| 384195888      | Bifidobacterium_animalis_lactis_V9_uid158865          | CAS-I-U                                                | csb3-3-5b6-csb1-2-1 + 4                                                                               |
| 408501645      | Bifidobacterium_asteroides_PRL2011_uid176921          | CAS-I-E                                                | 2-1-6e-5-7-cse2SS-8e-3 + 3HD                                                                          |
| 310286727      | Bifidobacterium_bifidum_S17_uid59545                  | CAS-II-A                                               | csn2-1-9                                                                                              |
| 384197500      | Bifidobacterium_breve_ACS_071_V_Sch8b_uid158863       | CAS-I-C                                                | 2-1-4-7-8c-3 + 3HD                                                                                    |
| 283456134      | Bifidobacterium_dentium_Bd1_uid43091                  | CAS-II                                                 | 2-1-9                                                                                                 |

Table S1 | Continued

| Cas1 GI number | Organism                                                      | Automatically assigned CRISPR-Cas system (CAS) subtype | CRISPR-Cas-related gene neighbours (1, 2, 3, 4, 5, 6, 7, 8, 9 and 10 are respective <i>cas</i> genes) |
|----------------|---------------------------------------------------------------|--------------------------------------------------------|-------------------------------------------------------------------------------------------------------|
| 283456492      | <i>Bifidobacterium_dentium_Bd1_uid43091</i>                   | CAS-I-C                                                | 1-8c-5-3 + 3HD                                                                                        |
| 312134081      | <i>Bifidobacterium_longum_BBMN68_uid60163</i>                 | CAS-I-E                                                | 3 + 3HD-8e-cse2SS-7-5-6e-1                                                                            |
| 384200945      | <i>Bifidobacterium_longum_KACC_91563_uid158861</i>            | CAS-II                                                 | 9-1                                                                                                   |
| 296126271      | <i>Brachyspira_murdochii_DSM_12563_uid48819</i>               | CAS-I-B                                                | 6-8a1-7-5-3 + 3HD-4-1-2                                                                               |
| 377813512      | <i>Burkholderia_YI23_uid81081</i>                             | CAS-I-E                                                | 2-1-6e-5-7-cse2SS-8e-3                                                                                |
| 222528176      | <i>Caldicellulosiruptor_bescii_DSM_6725_uid59201</i>          | CAS-III-A                                              | 6-6-8a1-7-5-3 + 3HD-4-1-2-x-x-x-csx1-10-csm3g7-csm3g7-x-csm3g7                                        |
| 222530612      | <i>Caldicellulosiruptor_bescii_DSM_6725_uid59201</i>          | CAS-I-B                                                | 2-1-4-3 + 3HD-5-x-8a1                                                                                 |
| 312128678      | <i>Caldicellulosiruptor_hydrothermalis_108_uid60157</i>       | CAS-I-B                                                | 2-1-4-3 + 3HD-5-7-8a1-6                                                                               |
| 312128727      | <i>Caldicellulosiruptor_hydrothermalis_108_uid60157</i>       | CAS-I-B                                                | 2-1-4-3 + 3HD-5-x-8a1-x-x-x-csm6                                                                      |
| 312794543      | <i>Caldicellulosiruptor_kristjanssonii_177R1B_uid60393</i>    | CAS-I-B                                                | 2-1-4-3 + 3HD-5-7-8a1-x-x-6                                                                           |
| 312794650      | <i>Caldicellulosiruptor_kristjanssonii_177R1B_uid60393</i>    | CAS-I-B                                                | 2-1-4-3 + 3HD-5-x-8                                                                                   |
| 312794692      | <i>Caldicellulosiruptor_kristjanssonii_177R1B_uid60393</i>    | CAS-I-B                                                | 4-1-2-8a1-x-5-3-csx1                                                                                  |
| 312623456      | <i>Caldicellulosiruptor_kronotskyensis_2002_uid60491</i>      | CAS-III-B                                              | 10-cmr3g5-cmr1g7-cmr4g7-cmr5SS-cmr6g7-1-4-3-5-7-x-8a1-6                                               |
| 312623502      | <i>Caldicellulosiruptor_kronotskyensis_2002_uid60491</i>      | CAS-I-B                                                | 2-1-4-3 + 3HD-5-x-8a1                                                                                 |
| 344996859      | <i>Caldicellulosiruptor_lactoaceticus_6A_uid60575</i>         | CAS-I-D                                                | 2-1-4-6-3-csc1g5-csc2g7-10d                                                                           |
| 344997553      | <i>Caldicellulosiruptor_lactoaceticus_6A_uid60575</i>         | CAS-I-B                                                | 2-1-4-3 + 3HD-5-x-8-csm6                                                                              |
| 344997601      | <i>Caldicellulosiruptor_lactoaceticus_6A_uid60575</i>         | CAS-I-B                                                | 4-1-2-8a1-x-5-3-x-x-csm6-x-csm3g7                                                                     |
| 302870841      | <i>Caldicellulosiruptor_obsidiansis_OB47_uid51501</i>         | CAS-III-B                                              | 6-8a1-7-5-3 + 3HD-4-1-2-cmr6g7-cmr5SS-cmr4g7-cmr1g7-cmr3g5-10-csx1                                    |
| 302872861      | <i>Caldicellulosiruptor_obsidiansis_OB47_uid51501</i>         | CAS-III-A                                              | csx1-x-csm5g7-csm4g5-csm3g7-csm2SS-10-x-x-4-1-2-8a1-x-5-3-x-x-x-csx1                                  |
| 312134146      | <i>Caldicellulosiruptor_owensensis_OL_uid60165</i>            | CAS-I-B                                                | 6-8a1-x-7-5-3-4-1-2-x-csx1                                                                            |
| 146295140      | <i>Caldicellulosiruptor_saccharolyticus_DSM_8903_uid58289</i> | CAS-I                                                  | 8a1-x-5-3HD-x-x-x-4-1-2-x-x-x-x-x-10-csm2SS-csm3g7                                                    |
| 146295386      | <i>Caldicellulosiruptor_saccharolyticus_DSM_8903_uid58289</i> | CAS-I-B                                                | 6-8a1-x-7-5-3-x-4-1                                                                                   |
| 146297392      | <i>Caldicellulosiruptor_saccharolyticus_DSM_8903_uid58289</i> | CAS-I-B                                                | 1-4-3-5-7-8a1-6                                                                                       |
| 383762167      | <i>Caldilinea_aerophila_DSM_14535__NBRC_104270_uid158165</i>  | CAS-III-A                                              | 2-1-6-csx15-x-csx1-csm5g7-csm4g5-csm3g7-csm2SS-10-csx1                                                |
| 383762541      | <i>Caldilinea_aerophila_DSM_14535__NBRC_104270_uid158165</i>  | CAS-I-A                                                | 8a1-7-5-3 + 3HD-6-1-4                                                                                 |
| 383787935      | <i>Caldisericum_exile_AZM16c01_uid158173</i>                  | CAS-I-B                                                | 6-6-8a1-7-5-3-4-1-2                                                                                   |
| 313673559      | <i>Calditerrivibrio_nitroreducens_DSM_19672_uid60821</i>      | CAS-III-A                                              | 2-Prim2-1-x-x-x-x-x-x-x-csx20-csm5g7                                                                  |
| 313673874      | <i>Calditerrivibrio_nitroreducens_DSM_19672_uid60821</i>      | CAS-I-B                                                | 6-x-7-5-3 + 3HD-x-1-2                                                                                 |
| 428297029      | <i>Calothrix_PCC_6303_uid183109</i>                           | CAS-III-B                                              | 1 + x-1-2-x-x-x-x-x-x-10-cmr4g7                                                                       |
| 428297030      | <i>Calothrix_PCC_6303_uid183109</i>                           | CAS-III-B                                              | 1 + x-1-2-x-x-x-x-x-x-10-cmr4g7                                                                       |
| 428298414      | <i>Calothrix_PCC_6303_uid183109</i>                           | CAS-I-D                                                | 3-x-x-x-10d-csc2g7-csc1g5-6-4-1-2                                                                     |
| 427716239      | <i>Calothrix_PCC_7507_uid182930</i>                           | Unknown                                                | 1                                                                                                     |
| 427716556      | <i>Calothrix_PCC_7507_uid182930</i>                           | CAS-I-D                                                | 2-1-4-6-csc1g5-csc2g7-10d-3                                                                           |
| 427717963      | <i>Calothrix_PCC_7507_uid182930</i>                           | CAS-III-A                                              | csm3g7-x-csm3g7-x-x-6-x-x-2-1-x-x-1                                                                   |

Table S1 | Continued

| Cas1 GI number | Organism                                                     | Automatically assigned CRISPR-Cas system (CAS) subtype | CRISPR-Cas-related gene neighbours (1, 2, 3, 4, 5, 6, 7, 8, 9 and 10 are respective <i>cas</i> genes) |
|----------------|--------------------------------------------------------------|--------------------------------------------------------|-------------------------------------------------------------------------------------------------------|
| 427717966      | Calothrix_PCC_7507_uid182930                                 | CAS-III-A                                              | csm3g7-x-csm3g7-x-x-6-x-x-x-2-1-x-x-1                                                                 |
| 427718222      | Calothrix_PCC_7507_uid182930                                 | CAS-I-D                                                | 2-1-4-6-x-3-csc1g5-csc2g7-10d                                                                         |
| 157164052      | Campylobacter_concisus_13826_uid58667                        | CAS-I-B                                                | 6-8-x-5-3-4-2-1                                                                                       |
| 154174048      | Campylobacter_curvus_525_92_uid58669                         | CAS-I-B                                                | 1-2-4-3-5-7-8-6                                                                                       |
| 118475338      | Campylobacter_fetus_82_40_uid58545                           | CAS-I-B                                                | 6-x-x-5-3 + 3HD-4-1-2                                                                                 |
| 157415743      | Campylobacter_jejuni_81116_uid58771                          | CAS-II                                                 | 2-1-9                                                                                                 |
| 384448745      | Campylobacter_jejuni_IA3902_uid159531                        | CAS-II                                                 | 2-1-9                                                                                                 |
| 384442101      | Campylobacter_jejuni_M1_uid159535                            | CAS-II                                                 | 2-1-9-9                                                                                               |
| 403056242      | Campylobacter_jejuni_NCTC_11168_BN148_uid174152              | CAS-II                                                 | 2-1-9                                                                                                 |
| 218563120      | Campylobacter_jejuni_NCTC_11168__ATCC_700819_uid57587        | CAS-II                                                 | 2-1-9                                                                                                 |
| 407942867      | Campylobacter_jejuni_PT14_uid176499                          | CAS-II                                                 | 2-1-9                                                                                                 |
| 57238545       | Campylobacter_jejuni_RM1221_uid57899                         | CAS-II                                                 | 2-1                                                                                                   |
| 384443889      | Campylobacter_jejuni_S3_uid159533                            | CAS-II                                                 | 2-1                                                                                                   |
| 153952137      | Campylobacter_jejuni_doylei_269_97_uid58671                  | CAS-II                                                 | 2-1-9                                                                                                 |
| 257093773      | Candidatus_Accumulibacter_phosphatis_clade_IIA_UW_1_uid59207 | CAS-III-B                                              | 2-1-2-x-x-6-csx1-cmr6g7-cmr5SS-cmr4g7-cmr3g5-10                                                       |
| 257093834      | Candidatus_Accumulibacter_phosphatis_clade_IIA_UW_1_uid59207 | CAS-I-E                                                | 3-8e-cse2SS-7-5-6e-1-2                                                                                |
| 342732369      | Candidatus_Arthromitus_SFB_mouse_Japan_uid71379              | CAS-I-C                                                | 3 + 3HD-5-8c-7-4-1-2                                                                                  |
| 384455776      | Candidatus_Arthromitus_SFB_mouse_Yit_uid159517               | CAS-I-C                                                | 3 + 3HD-5-8c-7-4-1-2                                                                                  |
| 347542431      | Candidatus_Arthromitus_SFB_rat_Yit_uid73425                  | CAS-I-C                                                | 3 + x-5-8c-7-4-1-2                                                                                    |
| 347756303      | Candidatus_Chloracidobacterium_thermophilum_B_uid73587       | CAS-I-C                                                | 6-3-8c-7-5-1 + 4-2                                                                                    |
| 347756766      | Candidatus_Chloracidobacterium_thermophilum_B_uid73587       | CAS-I-U                                                | 7-csb2-3-x-1 + 4-2                                                                                    |
| 218961167      | Candidatus_Cloacamonas_acidaminovorans_uid62959              | CAS-III-A                                              | csm5g7-csa3-csx1 + x-x-x-x-x-x-Prim2-x-1-2                                                            |
| 218961577      | Candidatus_Cloacamonas_acidaminovorans_uid62959              | CAS-I-B                                                | 4-2-1-3HD-5-7-8-6                                                                                     |
| 169831450      | Candidatus_Desulforudis_audaxviator_MP104C_uid59067          | CAS-I                                                  | 4-4-2-1-3 + 3HD-5-7-x-x-6                                                                             |
| 169831957      | Candidatus_Desulforudis_audaxviator_MP104C_uid59067          | CAS-III-B                                              | csm3g7-x-5g10-csm3g7-x-csx1-x-x-x-2-1-4-3 + 3HD-5-7-x-6-cmr6g7 + x-cmr5SS-cmr4g7-cmr1g7               |
| 170290046      | Candidatus_Korarchaeum_cryptofilum_OPF8_uid58601             | CAS-I-A                                                | 1-4-2-4-R-csa5SS-7-5-csa8a2-x-3                                                                       |
| 392375776      | Candidatus_Methylomirabilis_oxyfera_uid161981                | CAS-I-U                                                | 2-1 + 4-csb2-7-8x1-3                                                                                  |
| 407464693      | Candidatus_Nitrosopumilus_AR2_uid176130                      | Unknown                                                | 1                                                                                                     |
| 407462288      | Candidatus_Nitrosopumilus_koreensis_AR1_uid176129            | Unknown                                                | 1                                                                                                     |
| 408403000      | Candidatus_Nitrososphaera_gargensis_Ga9_2_uid176707          | CAS-I                                                  | 4-1-2-4-x-x-3-5-7-x-6                                                                                 |
| 302036890      | Candidatus_Nitrospira_defluvii_uid51175                      | CAS-I-E                                                | 3-8e-cse2SS-7-5-6e-1-2                                                                                |
| 294086112      | Candidatus_Puniceispirillum_marinum_IMCC1322_uid47081        | CAS-II                                                 | 9-1-2                                                                                                 |
| 340622235      | Capnocytophaga_canimorsus_Cc5_uid70727                       | CAS-II                                                 | 2-1-9                                                                                                 |
| 78043644       | Carboxydotherrmus_hydrogenoformans_Z_2901_uid57821           | CAS-I-B                                                | csm3g7-csm2SS-10-x-x-x-x-x-x-2-1-4-3-5-x-8-6                                                          |
| 256393069      | Catenulispora_acidiphila_DSM_44928_uid59077                  | CAS-I-E                                                | 2-1-6e-5-7-cse2SS-3 + 3HD + 8e                                                                        |
| 332669040      | Cellulomonas_fimi_ATCC_484_uid66779                          | CAS-I-E                                                | 3 + 3HD-8e-cse2SS-7-5-6e-1-2                                                                          |
| 192359205      | Cellvibrio_japonicus_Ueda107_uid59139                        | CAS-I-C                                                | 2-1-4-7-8c-5-3 + 3HD                                                                                  |
| 434386050      | Chamaesiphon_PCC_6605_uid183005                              | CAS-I-C                                                | 2-1-4-7-8c-5-3                                                                                        |
| 78188972       | Chlorobium_chlorochromatii_CaD3_uid58375                     | CAS-I-C                                                | 2-1-4-7-8c-5-3 + 3HD                                                                                  |
| 189345988      | Chlorobium_limicola_DSM_245_uid58127                         | CAS-I-A                                                | 6-x-x-8a1-7-5-3-1-2-4                                                                                 |
| 189346458      | Chlorobium_limicola_DSM_245_uid58127                         | CAS-III-B                                              | 1-2-1 + x-cmr1g7-csm3g7-10-cmr4g7                                                                     |

Table S1 | Continued

| Cas1 GI number | Organism                                              | Automatically assigned CRISPR-Cas system (CAS) subtype | CRISPR-Cas-related gene neighbours (1, 2, 3, 4, 5, 6, 7, 8, 9 and 10 are respective <i>cas</i> genes) |
|----------------|-------------------------------------------------------|--------------------------------------------------------|-------------------------------------------------------------------------------------------------------|
| 78187160       | <i>Chlorobium_luteolum</i> _DSM_273_uid58175          | CAS-I-C                                                | 3 + 3HD-5-8c-7-4-1-2                                                                                  |
| 189501080      | <i>Chlorobium_phaeobacteroides</i> _BS1_uid58131      | CAS-I-E                                                | 3HD-x-3-8e-cse2SS-6e-7-5-1-2                                                                          |
| 119357239      | <i>Chlorobium_phaeobacteroides</i> _DSM_266_uid58133  | CAS-I-C                                                | 2-1-4-x-8c-5-3 + 3HD-3HD                                                                              |
| 119357846      | <i>Chlorobium_phaeobacteroides</i> _DSM_266_uid58133  | CAS-III-A                                              | 6-csx1-csm5g7-csm4g5-csm3g7-csm2SS-10-x-csx15-csx1-1 + RT-2                                           |
| 119357853      | <i>Chlorobium_phaeobacteroides</i> _DSM_266_uid58133  | CAS-III                                                | 2-1-6                                                                                                 |
| 145220110      | <i>Chlorobium_phaeovibrioides</i> _DSM_265_uid58129   | CAS-I-C                                                | 3HD-3 + 3HD-5-8c-7-4-1-2                                                                              |
| 21673956       | <i>Chlorobium_tepidum</i> _TLS_uid57897               | CAS-I-C                                                | 2-1-4-7-8c-5-3 + 3HD                                                                                  |
| 21674788       | <i>Chlorobium_tepidum</i> _TLS_uid57897               | CAS-I-E                                                | 3-8e-cse2SS-6e-7-5-1-2                                                                                |
| 222523888      | <i>Chloroflexus_Y_400_fl_uid59085</i>                 | CAS-III-A                                              | 2-1-6-x-x-csx1-csm5g7-csm4g5-csm3g7-csm2SS-10                                                         |
| 222526429      | <i>Chloroflexus_Y_400_fl_uid59085</i>                 | CAS-I-A                                                | 8a1-7-5-3-6-1-2-4                                                                                     |
| 222526872      | <i>Chloroflexus_Y_400_fl_uid59085</i>                 | CAS-III                                                | 6-csx1-x-csx1-x-x-1-2                                                                                 |
| 219847509      | <i>Chloroflexus_aggregans</i> _DSM_9485_uid58621      | CAS-I-A                                                | 4-2-1-6-3-5-7-8a1                                                                                     |
| 219850296      | <i>Chloroflexus_aggregans</i> _DSM_9485_uid58621      | CAS-III-A                                              | 10-csm2SS-csm3g7-csm4g5-csm5g7 + x-csx1-x-6-1-2                                                       |
| 163846146      | <i>Chloroflexus_aurantiacus_J_10_fl_uid57657</i>      | CAS-III-A                                              | 2-1-6-x-csx1-csm5g7-csm4g5-csm3g7-csm2SS-10                                                           |
| 163848495      | <i>Chloroflexus_aurantiacus_J_10_fl_uid57657</i>      | CAS-I-A                                                | 8a1-7-5-3-6-1-2-4                                                                                     |
| 163848915      | <i>Chloroflexus_aurantiacus_J_10_fl_uid57657</i>      | CAS-III                                                | 6-csx1-x-csx1-x-x-1-2                                                                                 |
| 193216046      | <i>Chloroherpeton_thalassium</i> _ATCC_35110_uid59187 | CAS-I                                                  | 4-2-1-6                                                                                               |
| 34496684       | <i>Chromobacterium_violaceum</i> _ATCC_12472_uid58001 | CAS-I-C                                                | 3 + 3HD-5-8c-7-4-1-2                                                                                  |
| 34497211       | <i>Chromobacterium_violaceum</i> _ATCC_12472_uid58001 | CAS-I-F                                                | 6f-7f-5f-8f-3f-1                                                                                      |
| 92112367       | <i>Chromohalobacter_salexigens</i> _DSM_3043_uid62921 | CAS-I-E                                                | 3 + 3HD-x-x-8e-cse2SS-7-5-6e-1-2                                                                      |
| 428208003      | <i>Chroococciopsis_thermalis</i> _PCC_7203_uid183002  | CAS-I                                                  | 2-1-4-6-3                                                                                             |
| 283786691      | <i>Citrobacter_rodentium</i> _ICC168_uid43089         | CAS-I-E                                                | 3-8e-cse2SS-7-5-6e-1-2                                                                                |
| 376260588      | <i>Clostridium_BNL1100_uid84307</i>                   | CAS-I-C                                                | 3-5-8c-7-4-1-2                                                                                        |
| 407473145      | <i>Clostridium_acidurici_9a_uid176126</i>             | CAS-I-B                                                | 6-8a1-7-5-3-4-1-2                                                                                     |
| 220928906      | <i>Clostridium_cellulolyticum_H10_uid58709</i>        | CAS-I-C                                                | 3 + 3HD-5-x-x-4-1-2                                                                                   |
| 220930481      | <i>Clostridium_cellulolyticum_H10_uid58709</i>        | CAS-II                                                 | 2-1-9                                                                                                 |
| 374296492      | <i>Clostridium_clariflavum</i> _DSM_19732_uid82345    | CAS-III-A                                              | 4-2-1-csx1-csx1-csm3g7-x-csm3g7-5g10-csm3g7-10-x-3 + 3HD                                              |
| 126700597      | <i>Clostridium_difficile_630_uid57679</i>             | CAS-I-B                                                | 2-1-4-3-5-7-8a1 + x-6                                                                                 |
| 384362144      | <i>Clostridium_difficile_B11_uid158363</i>            | CAS-I-B                                                | 2-1-4-3-5-7-8a1 + x-6                                                                                 |
| 260684497      | <i>Clostridium_difficile_CD196_uid41017</i>           | CAS-I-B                                                | 2-1-4-3-5-7-8a1 + x-6                                                                                 |
| 260688155      | <i>Clostridium_difficile_R20291_uid40921</i>          | CAS-I-B                                                | 2-1-4-3-5-7-8a1 + x-6                                                                                 |
| 153955370      | <i>Clostridium_kluyveri</i> _DSM_555_uid58885         | CAS-I-B                                                | 2-1-4-3 + 3HD-5-x-8b-6                                                                                |
| 219855788      | <i>Clostridium_kluyveri</i> _NBRC_12016_uid59369      | CAS-I-B                                                | 2-1-4-3 + 3HD-5-x-8b-6                                                                                |
| 118443013      | <i>Clostridium_novyi_NT_uid58643</i>                  | CAS-I-B                                                | 2-1-4-3 + 3HD-5-x-8b-6                                                                                |
| 442805096      | <i>Clostridium_stercorarium</i> _DSM_8532_uid186819   | CAS-I-B                                                | 2-1-4-3 + 3HD-5-7-8a1-6                                                                               |
| 28210841       | <i>Clostridium_tetani_E88_uid57683</i>                | CAS-I-B                                                | 6-8-7-5-3-4-1                                                                                         |
| 28211139       | <i>Clostridium_tetani_E88_uid57683</i>                | CAS-I-B                                                | 1-4-3-5-7-8b-6                                                                                        |
| 125974782      | <i>Clostridium_thermocellum</i> _ATCC_27405_uid57917  | CAS-I-B                                                | 2-1-4-3 + 3HD-5-7-x-6                                                                                 |
| 125975696      | <i>Clostridium_thermocellum</i> _ATCC_27405_uid57917  | CAS-III-A                                              | csm3g7-5g10-csm3g7-x-x-csx1-x-csx1-1-2-4                                                              |
| 385780234      | <i>Clostridium_thermocellum</i> _DSM_1313_uid161989   | CAS-I-B                                                | 2-1-4-3 + 3HD-5-7-x-6                                                                                 |
| 328955026      | <i>Coriobacterium_glomerans</i> _PW2_uid65787         | CAS-I-E                                                | 3 + 3HD-8e-cse2SS-7-5-6e-1-2                                                                          |

Table S1 | Continued

| Cas1 GI number | Organism                                                   | Automatically assigned CRISPR-Cas system (CAS) subtype | CRISPR-Cas-related gene neighbours (1, 2, 3, 4, 5, 6, 7, 8, 9 and 10 are respective <i>cas</i> genes) |
|----------------|------------------------------------------------------------|--------------------------------------------------------|-------------------------------------------------------------------------------------------------------|
| 328956316      | <i>Coriobacterium glomerans</i> _PW2_uid65787              | CAS-II-A                                               | 9-1-2-csn2                                                                                            |
| 227832732      | <i>Corynebacterium aurimucosum</i> _ATCC_700975_uid59409   | CAS-I-E                                                | 3 + 3HD-8e-7-5-6e-1-2                                                                                 |
| 375289764      | <i>Corynebacterium diphtheriae</i> _241_uid83607           | CAS-II                                                 | 9-1-2                                                                                                 |
| 375291817      | <i>Corynebacterium diphtheriae</i> _241_uid83607           | CAS-I-E                                                | 5-7-cse2SS-8e-6e-3 + 3HD-1-2                                                                          |
| 376283540      | <i>Corynebacterium diphtheriae</i> _31A_uid84309           | CAS-II                                                 | 9-1-2                                                                                                 |
| 376286567      | <i>Corynebacterium diphtheriae</i> _BH8_uid84311           | CAS-II                                                 | 9-1-2                                                                                                 |
| 376289244      | <i>Corynebacterium diphtheriae</i> _C7__beta__uid84313     | CAS-II                                                 | 9-1-2                                                                                                 |
| 376241738      | <i>Corynebacterium diphtheriae</i> _CDCE_8392_uid84295     | CAS-I-E                                                | 3 + 3HD + x-8e-cse2SS-7-5-6e-1-2                                                                      |
| 376244597      | <i>Corynebacterium diphtheriae</i> _HC01_uid84297          | CAS-II                                                 | 9-1-2                                                                                                 |
| 376246654      | <i>Corynebacterium diphtheriae</i> _HC01_uid84297          | CAS-I-E                                                | 5-7-cse2SS-8e-6e-3 + 3HD-1-2                                                                          |
| 376292155      | <i>Corynebacterium diphtheriae</i> _HC02_uid84317          | CAS-II                                                 | 9-1-2                                                                                                 |
| 376250212      | <i>Corynebacterium diphtheriae</i> _HC03_uid84299          | CAS-I-E                                                | 3 + 3HD + x-8e-cse2SS-7-5-6e-1-2                                                                      |
| 376247407      | <i>Corynebacterium diphtheriae</i> _HC04_uid84301          | CAS-I-E                                                | 3 + 3HD + x-8e-cse2SS-7-5-6e-1-2                                                                      |
| 375292015      | <i>Corynebacterium diphtheriae</i> _INCA_402_uid83605      | CAS-I-E                                                | 3 + 3HD + x-8e-cse2SS-7-5-6e-1-2                                                                      |
| 38232679       | <i>Corynebacterium diphtheriae</i> _NCTC_13129_uid57691    | CAS-II                                                 | 9-1-2                                                                                                 |
| 38234755       | <i>Corynebacterium diphtheriae</i> _NCTC_13129_uid57691    | CAS-I-E                                                | 5-7-cse2SS-8e-6e-3-1-2                                                                                |
| 376253164      | <i>Corynebacterium diphtheriae</i> _PW8_uid84303           | CAS-I-E                                                | 3 + 3HD + x-8e-cse2SS-7-5-6e-1-2                                                                      |
| 376256052      | <i>Corynebacterium diphtheriae</i> _VA01_uid84305          | CAS-II                                                 | 9-1-2                                                                                                 |
| 68535718       | <i>Corynebacterium jeikeium</i> _K411_uid58399             | CAS-I-E                                                | 1-6e-5-7-cse2SS-8e-3                                                                                  |
| 389851004      | <i>Corynebacterium pseudotuberculosis</i> _258_uid167260   | CAS-I-E                                                | DinG-x-x-x-6e-3 + 3HD + x-1-2                                                                         |
| 379715956      | <i>Corynebacterium pseudotuberculosis</i> _316_uid89381    | CAS-I-E                                                | DinG-x-x-1-2                                                                                          |
| 392401162      | <i>Corynebacterium pseudotuberculosis</i> _Cp162_uid168258 | CAS-I-E                                                | DinG-x-x-1-2                                                                                          |
| 336326623      | <i>Corynebacterium resistens</i> _DSM_45100_uid50555       | CAS-I-E                                                | 1-6e-5-7-cse2SS-8e-3 + 3HD                                                                            |
| 397652782      | <i>Corynebacterium ulcerans</i> _0102_uid169879            | CAS-I-E                                                | 2-1-3 + 3HD-6e-8e-cse2SS-7-5                                                                          |
| 397652857      | <i>Corynebacterium ulcerans</i> _0102_uid169879            | CAS-I-U                                                | 2-1 + 4-csb3-3-x-csb1                                                                                 |
| 384514575      | <i>Corynebacterium ulcerans</i> _809_uid159659             | CAS-I-E                                                | 2-1-3-6e-8e-cse2SS-7-5                                                                                |
| 384514652      | <i>Corynebacterium ulcerans</i> _809_uid159659             | CAS-I-U                                                | 2-1 + 4-csb3-3-x-csb1                                                                                 |
| 337289649      | <i>Corynebacterium ulcerans</i> _BR_AD22_uid68291          | CAS-I-E                                                | 2-1-3 + 3HD-6e-8e-cse2SS-7-5                                                                          |
| 337289723      | <i>Corynebacterium ulcerans</i> _BR_AD22_uid68291          | CAS-I-U                                                | 2-1 + 4-csb3-3-x-csb1                                                                                 |
| 172041644      | <i>Corynebacterium urealyticum</i> _DSM_7109_uid61639      | CAS-I-E                                                | 2-1-6e-5-7-cse2SS-8e-3                                                                                |
| 212213313      | <i>Coxiella burnetii</i> _CbuG_Q212_uid58893               | CAS-I-F                                                | 1-5f-7f-6f                                                                                            |
| 154707248      | <i>Coxiella burnetii</i> _Dugway_SJ108_111_uid58629        | CAS-I-F                                                | 1-8f-5f-7f-6f                                                                                         |
| 209364215      | <i>Coxiella burnetii</i> _Dugway_SJ108_111_uid58629        | CAS-I-F                                                | 1-8f-5f-7f-6f                                                                                         |
| 428304235      | <i>Crinalium epipsammum</i> _PCC_9333_uid183113            | Unknown                                                | 1-2                                                                                                   |
| 156934981      | <i>Cronobacter sakazakii</i> _ATCC_BAA_894_uid58145        | CAS-I-E                                                | 2-1-6e-5-7-cse2SS-8e-3                                                                                |
| 389841918      | <i>Cronobacter sakazakii</i> _ES15_uid167045               | CAS-I-E                                                | 2-1-6e-5-7-cse2SS-8e-3                                                                                |
| 260596842      | <i>Cronobacter turicensis</i> _z3032_uid40821              | CAS-I-E                                                | 3-8e-cse2SS-7-5-6e-1-2                                                                                |
| 428769331      | <i>Cyanobacterium</i> _PCC_10605_uid183340                 | Unknown                                                | 2-1                                                                                                   |
| 428770999      | <i>Cyanobacterium</i> _PCC_10605_uid183340                 | CAS-I                                                  | 3-6-x-4-x-1-2                                                                                         |
| 428771810      | <i>Cyanobacterium</i> _PCC_10605_uid183340                 | CAS-III-B                                              | cmr4g7-x-x-x-cmr6g7-csm6-x-x-x-x-1-2                                                                  |
| 428772907      | <i>Cyanobacterium stanieri</i> _PCC_7202_uid183337         | CAS-III-B                                              | 2-1-x-x-x-x-10-cmr3g5-cmr4g7                                                                          |
| 428774573      | <i>Cyanobacterium stanieri</i> _PCC_7202_uid183337         | CAS-I-C                                                | 2-1 + 4-x-x-6-3 + 3HD-x-7-5                                                                           |
| 172035264      | <i>Cyanothece</i> _ATCC_51142_uid59013                     | CAS-III-B                                              | 2-1-x-x-10-x-cmr3g5-csm6-cmr4g7-x-cmr6g7                                                              |
| 172036113      | <i>Cyanothece</i> _ATCC_51142_uid59013                     | CAS-I-C                                                | 6-3-8c + 8c2-7-5-1 + 4-2                                                                              |
| 218438692      | <i>Cyanothece</i> _PCC_7424_uid59025                       | CAS-I-D                                                | 3-10d-csc2g7-csc1g5-6-4-1-2                                                                           |
| 218439403      | <i>Cyanothece</i> _PCC_7424_uid59025                       | CAS-I-E                                                | DinG + x-x-3 + 3HD-8e-cse2SS-7-5-6e-1-2                                                               |

Table S1 | Continued

| Cas1 GI number | Organism                                      | Automatically assigned CRISPR-Cas system (CAS) subtype | CRISPR-Cas-related gene neighbours (1, 2, 3, 4, 5, 6, 7, 8, 9 and 10 are respective <i>cas</i> genes) |
|----------------|-----------------------------------------------|--------------------------------------------------------|-------------------------------------------------------------------------------------------------------|
| 218442585      | Cyanothece_PCC_7424_uid59025                  | CAS-I-C                                                | 2-1 + 4-x-5-7-8c + 8c2-3 + 3HD-6                                                                      |
| 218442809      | Cyanothece_PCC_7424_uid59025                  | CAS-III-A                                              | csm6-x-x-RT-1-2                                                                                       |
| 219883136      | Cyanothece_PCC_7425_uid59435                  | CAS-III-B                                              | 10-cmr3g5-cmr4g7-x-cmr6g7-x-x-x-x-1-2                                                                 |
| 220907870      | Cyanothece_PCC_7425_uid59435                  | CAS-I-D                                                | 3-10d-csc2g7-csc1g5-6-4-1-2                                                                           |
| 220909452      | Cyanothece_PCC_7425_uid59435                  | CAS-I-E                                                | 2-1-6e-5-7-cse2S5-8e-x-3 + 3HD                                                                        |
| 220910738      | Cyanothece_PCC_7425_uid59435                  | CAS-III-A                                              | 2-1-x-x-x-x-x-csm3g7-x-x-6                                                                            |
| 307591969      | Cyanothece_PCC_7822_uid52547                  | CAS-I-D                                                | cmr4g7-x-cmr6g7-x-x-x-2-1-4-6-csc1g5-csc2g7-10d-3                                                     |
| 307592260      | Cyanothece_PCC_7822_uid52547                  | Unknown                                                | 2-1                                                                                                   |
| 307592471      | Cyanothece_PCC_7822_uid52547                  | CAS-III-B                                              | cmr1g7 + cmr6g7-x-cmr4g7-cmr3g5-10-x-x-x-x-2-1                                                        |
| 307591462      | Cyanothece_PCC_7822_uid52547                  | CAS-III-B                                              | 1 + x-2-x-x-x-x-x-10-cmr3g5-cmr4g7                                                                    |
| 218245380      | Cyanothece_PCC_8801_uid59027                  | CAS-I-D                                                | 2-1-4-6-csc1g5-csc2g7-10d-3                                                                           |
| 257058416      | Cyanothece_PCC_8802_uid59143                  | CAS-I-D                                                | 2-1-4-6-csc1g5-csc2g7-10d-3                                                                           |
| 434407100      | Cylindrospermum_stagnale_PCC_7417_uid183111   | CAS-I-D                                                | 10d-csc2g7-csc1g5-x-6-4-1-x-2                                                                         |
| 291278961      | Deferribacter_desulfuricans_SSM1_uid46653     | CAS-I                                                  | 3-x-x-5-x-x-8a1-6-2-1-4                                                                               |
| 73749217       | Dehalococcoides_CBDB1_uid58413                | CAS-I-E                                                | 1-6e-5-7-cse2S5-8e-3 + 3HD-x-x-x-4                                                                    |
| 289433192      | Dehalococcoides_GT_uid42115                   | CAS-I-E                                                | 2-1-6e-5-7-cse2S5-8e-3 + 3HD-x-x-x-4                                                                  |
| 94972104       | Deinococcus_geothermalis_DSM_11300_uid58275   | CAS-I-E                                                | 2-1-x-6e-5-7-cse2S5-8e-3 + 3HD                                                                        |
| 94984342       | Deinococcus_geothermalis_DSM_11300_uid58275   | CAS-I-C                                                | 2-1-4-7-8c-5-3 + 3HD                                                                                  |
| 386854797      | Deinococcus_gobiensis_I_0_uid162509           | CAS-I-A                                                | 4-2-1-5-7-8a2-3-6                                                                                     |
| 386855142      | Deinococcus_gobiensis_I_0_uid162509           | CAS-I-E                                                | 2-1-6e-5-7-cse2S5-8e-x-x-x-3 + 3HD                                                                    |
| 325284857      | Deinococcus_proteolyticus_MRP_uid63399        | CAS-I-E                                                | 3 + 3HD-8e-x-x-cse2S5-x-5-6e-1-2                                                                      |
| 333916900      | Delftia_Cs1_4_uid67319                        | CAS-I-F                                                | 6f-7f-5f-8f-x-x-3f-1                                                                                  |
| 160896657      | Delftia_acidovorans_SPH_1_uid58703            | CAS-I-F                                                | 1-x-x-8f-5f-7f-6f                                                                                     |
| 302343095      | Desulfarculus_baarsii_DSM_2075_uid51371       | CAS-I-C                                                | 3-5-8c-7-4-1-2                                                                                        |
| 302343124      | Desulfarculus_baarsii_DSM_2075_uid51371       | CAS-III-A                                              | csm3g7-csm3g7-csm3g7-10-1 + RT-2-6                                                                    |
| 218782762      | Desulfatibacillum_alkenivorans_AK_01_uid58913 | CAS-I-E                                                | 3 + 3HD-8e-cse2S5-6e-7-5-1-2                                                                          |
| 219668223      | Desulfotobacterium_hafniense_DCB_2_uid57749   | CAS-I-C                                                | 5-x-x-3-4-1-2                                                                                         |
| 219669947      | Desulfotobacterium_hafniense_DCB_2_uid57749   | CAS-I-B                                                | 2-1-4-3 + 3HD-x-x-5-x-x-x-x-6                                                                         |
| 89895510       | Desulfotobacterium_hafniense_Y51_uid58605     | CAS-I-B                                                | 2-1-4-3 + 3HD-x-x-x-5                                                                                 |
| 328951839      | Desulfobacca_acetoxidans_DSM_11109_uid65785   | CAS-I-A                                                | 4-x-5-7-csa5S5-3HD-3-2-1                                                                              |
| 328953000      | Desulfobacca_acetoxidans_DSM_11109_uid65785   | CAS-III                                                | 6-x-x-x-x-RT-x-x-1-2                                                                                  |
| 328953422      | Desulfobacca_acetoxidans_DSM_11109_uid65785   | CAS-III-A                                              | csm5g7-csm6-x-csx20-csx1-x-x-x-Prim2 + x-x-1-2                                                        |
| 328954440      | Desulfobacca_acetoxidans_DSM_11109_uid65785   | CAS-III-A                                              | 1 + RT-x-x-csm3g7-x-csm6-csm3g7-x-csm3g7-csm3g7                                                       |
| 224367660      | Desulfobacterium_autotrophicum_HRM2_uid59061  | CAS-I-B                                                | 1-2-x-8-x-7-5-3 + 3HD-4                                                                               |
| 408418420      | Desulfobacula_toluolica_Tol2_uid175777        | CAS-I-B                                                | 3-x-7-6-4-1-2                                                                                         |
| 408420400      | Desulfobacula_toluolica_Tol2_uid175777        | CAS-I-B                                                | 1-2-x-8-x-5-3 + 3HD-4                                                                                 |
| 320353599      | Desulfobulbus_propionicus_DSM_2032_uid62265   | CAS-I-C                                                | 3 + 3HD-5-8c-7-x-4-1-2                                                                                |
| 158522999      | Desulfococcus_oleovorans_Hxd3_uid58777        | CAS-I-E                                                | 3-8e-cse2S5-7-5-6e-1-2                                                                                |
| 392409180      | Desulfomonile_tiedjei_DSM_6799_uid168320      | CAS-I-C                                                | 3 + 3HD-5-8c-7-4-1-2                                                                                  |



Table S1 | Continued

| Cas1 GI number | Organism                                              | Automatically assigned CRISPR-Cas system (CAS) subtype | CRISPR-Cas-related gene neighbours (1, 2, 3, 4, 5, 6, 7, 8, 9 and 10 are respective <i>cas</i> genes) |
|----------------|-------------------------------------------------------|--------------------------------------------------------|-------------------------------------------------------------------------------------------------------|
| 392412844      | Desulfomonile_tiedjei_DSM_6799_uid168320              | CAS-I-E                                                | 3-8e-cse2SS-7-5-6e-1-2                                                                                |
| 392424830      | Desulfosporosinus_acidiphilus_SJ4_uid156759           | CAS-I-C                                                | 3 + 3HD-5-8c-7-1-2                                                                                    |
| 374994461      | Desulfosporosinus_orientis_DSM_765_uid82939           | CAS-I-C                                                | 3 + 3HD-5-8c-7-4-1-2                                                                                  |
| 258514214      | Desulfotomaculum_acetoxidans_DSM_771_uid59109         | CAS-I-B                                                | 6-8a1-7-5-3-4-1-2                                                                                     |
| 258516129      | Desulfotomaculum_acetoxidans_DSM_771_uid59109         | CAS-III-B                                              | csx1-6-2-1 + 4-cmr6g7-cmr5SS-cmr4g7-cmr3g5-10-cmr1g7 + x-csx1                                         |
| 258516154      | Desulfotomaculum_acetoxidans_DSM_771_uid59109         | CAS-I-B                                                | 2-1-4-3 + 3HD-5-x-x-6                                                                                 |
| 258516757      | Desulfotomaculum_acetoxidans_DSM_771_uid59109         | CAS-I-C                                                | 2-1-4-7-8c-5-3 + 3HD                                                                                  |
| 258517354      | Desulfotomaculum_acetoxidans_DSM_771_uid59109         | CAS-I-B                                                | 2-1-4-3-5-x-8-6                                                                                       |
| 333922763      | Desulfotomaculum_carboxydivorans_CO_1_SRB_uid67317    | CAS-I-C                                                | 3 + 3HD-5-8c-7-4-1-2                                                                                  |
| 333922948      | Desulfotomaculum_carboxydivorans_CO_1_SRB_uid67317    | CAS-I-A                                                | 6-8a1-7-5-3 + 3HD-1-2-4-4                                                                             |
| 333977937      | Desulfotomaculum_kuznetsovii_DSM_6115_uid67357        | CAS-III-B                                              | cmr1g7-cmr4g7-cmr5SS-cmr6g7-6-8a1-x-5-3-4-1-2                                                         |
| 333978075      | Desulfotomaculum_kuznetsovii_DSM_6115_uid67357        | CAS-I-B                                                | 6-8a1-7-5-3 + 3HD-4-1-2                                                                               |
| 333980328      | Desulfotomaculum_kuznetsovii_DSM_6115_uid67357        | CAS-I                                                  | 4-4-2-1-x-x-7-x-3 + 3HD-x-6                                                                           |
| 134298414      | Desulfotomaculum_reducens_MI_1_uid58277               | CAS-I-B                                                | 6-8-x-5-3 + 3HD-4-1-2                                                                                 |
| 134298871      | Desulfotomaculum_reducens_MI_1_uid58277               | CAS-I-C                                                | 3 + 3HD-5-8c-7-4-1-2                                                                                  |
| 134299482      | Desulfotomaculum_reducens_MI_1_uid58277               | CAS-III-A                                              | 1 + 4-2-10-csm2SS-csm3g7-csm4g5-csx1-6                                                                |
| 334339986      | Desulfotomaculum_ruminis_DSM_2154_uid67507            | CAS-I-C                                                | 3 + 3HD-5-8c-7-4-1-2                                                                                  |
| 334341514      | Desulfotomaculum_ruminis_DSM_2154_uid67507            | CAS-I-B                                                | 2-1-4-3 + 3HD-5-x-8-6                                                                                 |
| 220904201      | Desulfovibrio_desulfuricans_ATCC_27774_uid59213       | CAS-I-E                                                | 3 + 3HD-8e-cse2SS-6e-7-5-1-2                                                                          |
| 376297899      | Desulfovibrio_desulfuricans_ND132_uid63159            | CAS-I-C                                                | 3 + 3HD-5-8c-7-4-1-2                                                                                  |
| 436839745      | Desulfovibrio_hydrothermalis_AM13_DSM_14728_uid184831 | CAS-III-B                                              | 1 + RT-2-x-x-cmr6g7-cmr5SS-cmr4g7-cmr3g5-10-cmr1g7                                                    |
| 436842170      | Desulfovibrio_hydrothermalis_AM13_DSM_14728_uid184831 | CAS-I-F                                                | 6f-7f-5f-8f-3f-1                                                                                      |
| 239906078      | Desulfovibrio_magneticus_RS_1_uid59309                | CAS-I-C                                                | 3 + 3HD-5-8c-7-4-1-2                                                                                  |
| 239908820      | Desulfovibrio_magneticus_RS_1_uid59309                | CAS-I-F                                                | 6f-7f-5f-8f-x-3f-1                                                                                    |
| 120586827      | Desulfovibrio_vulgaris_DP4_uid58679                   | CAS-I-C                                                | 2-1-4-7-8c-5-3 + 3HD                                                                                  |
| 46562259       | Desulfovibrio_vulgaris_Hildenborough_uid57645         | CAS-I-C                                                | 3 + 3HD-5-8c-7-4-1-2                                                                                  |
| 387134024      | Desulfovibrio_vulgaris_RCH1_uid161961                 | CAS-I-C                                                | 3 + 3HD-5-8c-7-4-1-2                                                                                  |
| 218887066      | Desulfovibrio_vulgaris_Miyazaki_F_uid59089            | CAS-I-C                                                | 3 + 3HD-5-8c-7-4-1-2                                                                                  |
| 317051111      | Desulfurispirillum_indicum_S5_uid45897                | CAS-I-F                                                | 6f-7f-5f-x-x-8f-x-x-1                                                                                 |
| 317051217      | Desulfurispirillum_indicum_S5_uid45897                | CAS-III-A                                              | 10-csm2SS-csm3g7-csm4g5-csm5g7-x-x-csx1-csx20-x-1-2-x-2                                               |
| 297569499      | Desulfurivibrio_alkaliphilus_AHT2_uid49487            | CAS-I-F                                                | 6f-7f-5f-8f-3f-1                                                                                      |
| 390938732      | Desulfurococcus_fermentans_DSM_16532_uid75119         | CAS-I-A                                                | R-4-1-2-4-R-x-7-5-x-3-x-6                                                                             |
| 218884093      | Desulfurococcus_kamchatkensis_1221n_uid59133          | CAS-I-A                                                | 6-3HD-3-csaXg8-5-7-csa5SS-R-4-2-1-4-R-x-cmr3g5-10-cmr6g7-cmr1g7-cmr5SS-cmr4g7-csm6                    |
| 320101181      | Desulfurococcus_mucosus_DSM_2162_uid62227             | CAS-I-A                                                | 1-4-2-4-x-7-5-8a2-3-x-R                                                                               |
| 307130364      | Dickeya_dadantii_3937_uid52537                        | CAS-I-C                                                | 2-1-4-7-8c-5-3                                                                                        |
| 307132487      | Dickeya_dadantii_3937_uid52537                        | CAS-I-F                                                | 6f-7f-5f-8f-3f-1                                                                                      |
| 271498931      | Dickeya_dadantii_Ech586_uid42519                      | CAS-I-E                                                | 3-x-8e-cse2SS-7-5-6e-1-2                                                                              |
| 271501957      | Dickeya_dadantii_Ech586_uid42519                      | CAS-I-F                                                | 6f-7f-5f-8f-3f-1                                                                                      |
| 242238186      | Dickeya_dadantii_Ech703_uid59363                      | CAS-I-F                                                | 6f-7f-5f-8f-3f-1                                                                                      |
| 242240984      | Dickeya_dadantii_Ech703_uid59363                      | CAS-I-E                                                | 2-1-6e-5-7-cse2SS-8e-3                                                                                |

Table S1 | Continued

| Cas1 GI number | Organism                                              | Automatically assigned CRISPR-Cas system (CAS) subtype | CRISPR-Cas-related gene neighbours (1, 2, 3, 4, 5, 6, 7, 8, 9 and 10 are respective <i>cas</i> genes) |
|----------------|-------------------------------------------------------|--------------------------------------------------------|-------------------------------------------------------------------------------------------------------|
| 251788335      | <i>Dickeya_zeae_Ech1591_uid59297</i>                  | CAS-I-F                                                | 1-3f-8f-5f-7f-6f                                                                                      |
| 251788543      | <i>Dickeya_zeae_Ech1591_uid59297</i>                  | CAS-I-E                                                | 2-1-5-7-6e-cse2SS-8e-3 + 3HD                                                                          |
| 206900365      | <i>Dictyoglomus_thermophilum_H_6_12_uid59439</i>      | CAS-I-B                                                | 2-1-4-3 + 3HD-5-7-8a1-6                                                                               |
| 206900175      | <i>Dictyoglomus_thermophilum_H_6_12_uid59439</i>      | CAS-I                                                  | 6-8a1-x-5-3 + 3HD-4-1-2                                                                               |
| 217967015      | <i>Dictyoglomus_turgidum_DSM_6724_uid59177</i>        | CAS-I                                                  | csm4g5-csm3g7-csm2SS-10-csx3-x-x-x-x-2-1-4-3-5-x-8-6                                                  |
| 159042957      | <i>Dinoroseobacter_shibae_DFL_12_uid58707</i>         | CAS-II                                                 | 9-1-2                                                                                                 |
| 159045760      | <i>Dinoroseobacter_shibae_DFL_12_uid58707</i>         | CAS-I-E                                                | 3 + 3HD-8e-cse2SS-7-5-6e-1-2                                                                          |
| 339445982      | <i>Eggerthella_YY7918_uid68707</i>                    | CAS-II-A                                               | csn2-2-1-9                                                                                            |
| 257791721      | <i>Eggerthella_lenta_DSM_2243_uid59079</i>            | CAS-I-C                                                | 2-1-4-7-8c-5-3 + 3HD                                                                                  |
| 187250661      | <i>Elusimicrobium_minutum_Pei191_uid58949</i>         | CAS-II                                                 | 9-1-2                                                                                                 |
| 146311059      | <i>Enterobacter_638_uid58727</i>                      | CAS-I-F                                                | 1-3f-8f-5f-7f-6f                                                                                      |
| 397699067      | <i>Enterococcus_faecalis_D32_uid171261</i>            | CAS-II-A                                               | 9-1-2-csn2                                                                                            |
| 384512369      | <i>Enterococcus_faecalis_OG1RF_uid54927</i>           | CAS-II-A                                               | 9-1-2-csn2                                                                                            |
| 392988475      | <i>Enterococcus_hirae_ATCC_9790_uid70619</i>          | CAS-II-A                                               | 9-1-2-csn2                                                                                            |
| 385785743      | <i>Erwinia_Ejp617_uid159955</i>                       | CAS-I-E                                                | 2-1-6e-5-7-cse2SS-8e-3 + 3HD                                                                          |
| 292898489      | <i>Erwinia_amylovora_ATCC_49946_uid46943</i>          | CAS-I-E                                                | 3 + 3HD-8e-cse2SS-7-5-6e-1-2                                                                          |
| 292489282      | <i>Erwinia_amylovora_CFBP1430_uid46839</i>            | CAS-I-E                                                | 2-1-6e-5-7-cse2SS-8e-3 + 3HD                                                                          |
| 387870239      | <i>Erwinia_pyrifoliae_DSM_12163_uid159693</i>         | CAS-I-E                                                | 3 + 3HD-8e-cse2SS-7-5-6e-1-2                                                                          |
| 387870253      | <i>Erwinia_pyrifoliae_DSM_12163_uid159693</i>         | CAS-I-F                                                | 1-3f-x-x-x-8f-5f-7f-6f                                                                                |
| 259907486      | <i>Erwinia_pyrifoliae_Ep1_96_uid40659</i>             | CAS-I-E                                                | 3 + 3HD-8e-cse2SS-7-5-6e-1-2                                                                          |
| 259907498      | <i>Erwinia_pyrifoliae_Ep1_96_uid40659</i>             | CAS-I-F                                                | 1-3f-x-x-8f-5f-7f-6f                                                                                  |
| 188532985      | <i>Erwinia_tasmaniensis_Et1_99_uid59029</i>           | CAS-I-F                                                | 1-3f-x-x-8f-5f-7f-6f                                                                                  |
| 387890346      | <i>Escherichia_blattae_DSM_4481_uid165043</i>         | CAS-I-E                                                | 2-1-6e-5-7-cse2SS-8e-x-x-3                                                                            |
| 387608391      | <i>Escherichia_coli_042_uid161985</i>                 | CAS-I-E                                                | 2-1-6e-5-7-cse2SS-8e-3                                                                                |
| 218696353      | <i>Escherichia_coli_55989_uid59383</i>                | CAS-I-E                                                | 2-1-6e-5-7-cse2SS-8e-3                                                                                |
| 117623062      | <i>Escherichia_coli_APEC_O1_uid58623</i>              | CAS-I-F                                                | 1-3f-8f-5f-7f-6f                                                                                      |
| 443618784      | <i>Escherichia_coli_APEC_O78_uid187277</i>            | CAS-I-E                                                | 2-1-6e-5-7-cse2SS-8e-3-3HD                                                                            |
| 170018999      | <i>Escherichia_coli_ATCC_8739_uid58783</i>            | CAS-I-E                                                | 3-8e-cse2SS-7-5-6e-1-2                                                                                |
| 238901892      | <i>Escherichia_coli_BW2952_uid59391</i>               | CAS-I-E                                                | 2-1-6e-5-7-cse2SS-8e-3                                                                                |
| 386594505      | <i>Escherichia_coli_DH1_uid161951</i>                 | CAS-I-E                                                | 3-8e-cse2SS-7-5-6e-1-2                                                                                |
| 387622438      | <i>Escherichia_coli_DH1_uid162051</i>                 | CAS-I-E                                                | 2-1-6e-5-7-cse2SS-8e-3                                                                                |
| 157155405      | <i>Escherichia_coli_E24377A_uid58395</i>              | CAS-I-E                                                | 1-6e-5-7-cse2SS-8e-3                                                                                  |
| 218688665      | <i>Escherichia_coli_ED1a_uid59379</i>                 | CAS-I-F                                                | 1-3f-8f-5f-7f-6f                                                                                      |
| 387613378      | <i>Escherichia_coli_ETEC_H10407_uid161993</i>         | CAS-I-E                                                | 2-1-6e-5-7-cse2SS-8e                                                                                  |
| 157162204      | <i>Escherichia_coli_HS_uid58393</i>                   | CAS-I-E                                                | 1-6e-5-7-cse2SS-8e-x-3                                                                                |
| 218555302      | <i>Escherichia_coli_IAI1_uid59377</i>                 | CAS-I-E                                                | 2-1-6e-5-7-cse2SS-8e-3                                                                                |
| 386598616      | <i>Escherichia_coli_IHE3034_uid162007</i>             | CAS-I-F                                                | 1-3f-8f-7f-6f                                                                                         |
| 386700332      | <i>Escherichia_coli_KO11FL_uid162099</i>              | CAS-I-E                                                | 3-8e-cse2SS-7-5-6e-1-2                                                                                |
| 378711820      | <i>Escherichia_coli_KO11FL_uid52593</i>               | CAS-I-E                                                | 3-8e-cse2SS-7-5-6e-1-2                                                                                |
| 170082330      | <i>Escherichia_coli_K_12_substr_DH10B_uid58979</i>    | CAS-I-E                                                | 2-1-6e-5-7-cse2SS-8e-3                                                                                |
| 16130662       | <i>Escherichia_coli_K_12_substr_MG1655_uid57779</i>   | CAS-I-E                                                | 2-1-6e-5-7-cse2SS-8e-3                                                                                |
| 388478772      | <i>Escherichia_coli_K_12_substr_W3110_uid161931</i>   | CAS-I-E                                                | 2-1-6e-5-7-cse2SS-8e-3                                                                                |
| 222155607      | <i>Escherichia_coli_LF82_uid161965</i>                | CAS-I-F                                                | 1-3f-8f-5f-7f-6f                                                                                      |
| 260845402      | <i>Escherichia_coli_O103_H2_12009_uid41013</i>        | CAS-I-E                                                | 2-1-6e-5-cse2SS-8e-3                                                                                  |
| 410481280      | <i>Escherichia_coli_O104_H4_2009EL_2050_uid175905</i> | CAS-I-E                                                | 3-8e-cse2SS-7-5-6e-1-2                                                                                |
| 407470625      | <i>Escherichia_coli_O104_H4_2009EL_2071_uid176128</i> | CAS-I-E                                                | 3-8e-cse2SS-7-5-6e-1-2                                                                                |
| 407480714      | <i>Escherichia_coli_O104_H4_2011C_3493_uid176127</i>  | CAS-I-E                                                | 3-8e-cse2SS-7-5-6e-1-2                                                                                |
| 260869434      | <i>Escherichia_coli_O111_H_11128_uid41023</i>         | CAS-I-E                                                | 2-1-6e-5-7-cse2SS-8e-3                                                                                |

Table S1 | Continued

| Cas1 GI number | Organism                                              | Automatically assigned CRISPR-Cas system (CAS) subtype | CRISPR-Cas-related gene neighbours (1, 2, 3, 4, 5, 6, 7, 8, 9 and 10 are respective <i>cas</i> genes) |
|----------------|-------------------------------------------------------|--------------------------------------------------------|-------------------------------------------------------------------------------------------------------|
| 209397933      | <i>Escherichia_coli_O157_H7_EC4115_uid59091</i>       | CAS-I-E                                                | 2-1-6e-5-7-cse2SS-8e-3                                                                                |
| 15803272       | <i>Escherichia_coli_O157_H7_EDL933_uid57831</i>       | CAS-I-E                                                | 2-1-6e-5-7-cse2SS-8e-3                                                                                |
| 15832863       | <i>Escherichia_coli_O157_H7_Sakai_uid57781</i>        | CAS-I-E                                                | 2-1-6e-5-7-cse2SS-8e-3                                                                                |
| 254794695      | <i>Escherichia_coli_O157_H7_TW14359_uid59235</i>      | CAS-I-E                                                | 2-1-6e-5-7-cse2SS-8e-3                                                                                |
| 260856866      | <i>Escherichia_coli_O26_H11_11368_uid41021</i>        | CAS-I-E                                                | 2-1-6e-5-7-cse2SS-8e                                                                                  |
| 291284082      | <i>Escherichia_coli_O55_H7_CB9615_uid46655</i>        | CAS-I-E                                                | 2-1-6e-5-7-cse2SS-8e-3                                                                                |
| 387508107      | <i>Escherichia_coli_O55_H7_RM12579_uid162153</i>      | CAS-I-E                                                | 2-1-6e-5-7-cse2SS-8e-3                                                                                |
| 387616140      | <i>Escherichia_coli_O83_H1_NRG_857C_uid161987</i>     | CAS-I-F                                                | 1-3f-8f-5f-7f-6f                                                                                      |
| 218557787      | <i>Escherichia_coli_S88_uid62979</i>                  | CAS-I-F                                                | 1-3f-8f-7f-6f                                                                                         |
| 209920201      | <i>Escherichia_coli_SE11_uid59425</i>                 | CAS-I-E                                                | 2-1-6e-5-7-cse2SS-8e-3                                                                                |
| 170681830      | <i>Escherichia_coli_SMS_3_5_uid58919</i>              | CAS-I-E                                                | 2-1-6e-5-7-cse2SS-8e-3                                                                                |
| 386605207      | <i>Escherichia_coli_UM146_uid162043</i>               | CAS-I-F                                                | 6f-7f-8f-3f-1                                                                                         |
| 386615473      | <i>Escherichia_coli_UMNK88_uid161991</i>              | CAS-I-E                                                | 2-1-6e-5-7-cse2SS-8e-x-3                                                                              |
| 91209921       | <i>Escherichia_coli_UTI89_uid58541</i>                | CAS-I-F                                                | 1-3f-8f-5f-5f-7f-6f                                                                                   |
| 386610119      | <i>Escherichia_coli_W_uid162011</i>                   | CAS-I-E                                                | 2-1-6e-5-7-cse2SS-8e-3                                                                                |
| 386710611      | <i>Escherichia_coli_W_uid162101</i>                   | CAS-I-E                                                | 2-1-6e-5-7-cse2SS-8e-3                                                                                |
| 387883934      | <i>Escherichia_coli_Xuzhou21_uid163995</i>            | CAS-I-E                                                | 2-1-6e-5-7-cse2SS-8e-3                                                                                |
| 218547725      | <i>Escherichia_fergusonii_ATCC_35469_uid59375</i>     | CAS-I-E                                                | 3-8e-cse2SS-7-5-6e-1-2                                                                                |
| 317131634      | <i>Ethanoligenens_harbinense_YUAN_3_uid46255</i>      | CAS-I-C                                                | 2-1-4-7-8c-5-3 + 3HD                                                                                  |
| 310825770      | <i>Eubacterium_limosum_KIST612_uid59777</i>           | CAS-I-B                                                | 6-8b-x-5-3 + 3HD-4-1-2                                                                                |
| 238924076      | <i>Eubacterium_rectale_ATCC_33656_uid59169</i>        | CAS-II                                                 | 9-1-2                                                                                                 |
| 238924839      | <i>Eubacterium_rectale_ATCC_33656_uid59169</i>        | CAS-I-C                                                | 2-1-4-7-8c-5-x-x-3                                                                                    |
| 172056196      | <i>Exiguobacterium_sibiricum_255_15_uid58053</i>      | CAS-I-C                                                | 3-5-8c-7-4-1-2                                                                                        |
| 288932203      | <i>Ferroglobus_placidus_DSM_10642_uid40863</i>        | CAS-III-B                                              | 1-4-2-x-x-cmr4g7-10-x-x-cmr4g7-cmr1g7                                                                 |
| 385805115      | <i>Fervidococcus_fontis_Kam940_uid162201</i>          | CAS-I-A                                                | 6-R-3HD-3-8a2-5-7-x-x-4-1-2-4-R-R-x-x-csm6-cmr6g7-cmr1g7-cmr5SS                                       |
| 154249624      | <i>Fervidobacterium_nodosum_Rt17_B1_uid58625</i>      | CAS-I-B                                                | 6-8a1-x-5-3-4-1-2                                                                                     |
| 154250065      | <i>Fervidobacterium_nodosum_Rt17_B1_uid58625</i>      | CAS-III-A                                              | csx1-x-1-10-csm2SS-csm3g7-csm4g5-csm5g7-x-6-x-2-2                                                     |
| 154250301      | <i>Fervidobacterium_nodosum_Rt17_B1_uid58625</i>      | Unknown                                                | 1                                                                                                     |
| 383787172      | <i>Fervidobacterium_pennivorans_DSM_9078_uid78143</i> | CAS-III-A                                              | 2-2-x-6-x-csm5g7-csm4g5-csm3g7-csm2SS-10-1                                                            |
| 385789536      | <i>Fibrobacter_succinogenes_S85_uid161919</i>         | CAS-II                                                 | 9-1-2                                                                                                 |
| 385790829      | <i>Fibrobacter_succinogenes_S85_uid161919</i>         | CAS-III-A                                              | 1-2-x-csx1-10-csm3g7-csm3g7-x-csm3g7                                                                  |
| 261414554      | <i>Fibrobacter_succinogenes_S85_uid41169</i>          | CAS-II                                                 | 9-1-2                                                                                                 |
| 261415948      | <i>Fibrobacter_succinogenes_S85_uid41169</i>          | CAS-III-A                                              | 1-2-x-x-csx1-10-csm3g7-x-csm3g7-csx20                                                                 |
| 374307349      | <i>Filifactor_alocis_ATCC_35896_uid46625</i>          | CAS-I-C                                                | 3-5-8c-7-4-1-2                                                                                        |
| 374307737      | <i>Filifactor_alocis_ATCC_35896_uid46625</i>          | CAS-II-A                                               | csn2-2-1-9                                                                                            |
| 169823756      | <i>Fingoldia_magna_ATCC_29328_uid58867</i>            | CAS-II-A                                               | csa3-x-x-x-x-9-1-2-csn2-PDEDXK                                                                        |
| 365959405      | <i>Flavobacterium_columnare_ATCC_49512_uid80731</i>   | CAS-II                                                 | 9-x-x-x-1                                                                                             |
| 150025576      | <i>Flavobacterium_psychrophilum_JIP02_86_uid61627</i> | CAS-II                                                 | 9-1-2                                                                                                 |
| 392395717      | <i>Flexibacter_litoralis_DSM_6794_uid168257</i>       | Unknown                                                | 2-x-1                                                                                                 |
| 336323211      | <i>Flexistipes_sinusarabici_DSM_4947_uid68147</i>     | CAS-I-B                                                | 2-1-4-3 + 3HD-5-7-8a1-6                                                                               |
| 336323599      | <i>Flexistipes_sinusarabici_DSM_4947_uid68147</i>     | CAS-III-A                                              | csm5g7-csm4g5-csm3g7-csm2SS-x-csx1-6-x-2-1-Prim2                                                      |

Table S1 | Continued

| Cas1 GI number | Organism                                                 | Automatically assigned CRISPR-Cas system (CAS) subtype | CRISPR-Cas-related gene neighbours (1, 2, 3, 4, 5, 6, 7, 8, 9 and 10 are respective <i>cas</i> genes) |
|----------------|----------------------------------------------------------|--------------------------------------------------------|-------------------------------------------------------------------------------------------------------|
| 336323857      | <i>Flexistipes_sinusarabici_DSM_4947_uid68147</i>        | CAS-III-B                                              | cmr6g7-cmr5SS-cmr4g7-cmr3g5-10-cmr1g7-csx1-6-x-2-1-Prim2                                              |
| 327405118      | <i>Fluviicola_taffensis_DSM_16823_uid65271</i>           | CAS-II                                                 | 2-1-x-x-9                                                                                             |
| 385793361      | <i>Francisella_cf__novicida_Fx1_uid162105</i>            | Unknown                                                | 20G-x-x-x-x-csa3-2-1-4                                                                                |
| 118497353      | <i>Francisella_novicida_U112_uid58499</i>                | CAS-II-B                                               | 9-1-2-4                                                                                               |
| 118497969      | <i>Francisella_novicida_U112_uid58499</i>                | Unknown                                                | 20G-x-x-x-x-csa3-2-1-4                                                                                |
| 167627880      | <i>Francisella_philomiragia_ATCC_25017_uid59105</i>      | Unknown                                                | 4-1-2                                                                                                 |
| 86738746       | <i>Frankia_Ccl3_uid58397</i>                             | CAS-I-E                                                | 3-8e-cse2SS-7-5-6e-1-2                                                                                |
| 86742032       | <i>Frankia_Ccl3_uid58397</i>                             | CAS-I-C                                                | 3-5-8c-7-4-1-2                                                                                        |
| 111219951      | <i>Frankia_alni_ACN14a_uid58695</i>                      | CAS-I-E                                                | 3 + 3HD-8e-cse2SS-7-5-6e-1-2                                                                          |
| 111224947      | <i>Frankia_alni_ACN14a_uid58695</i>                      | CAS-I-B                                                | 6-x-7-3 + 5-4-1-2                                                                                     |
| 19704512       | <i>Fusobacterium_nucleatum_ATCC_25586_uid57885</i>       | CAS-I-B                                                | 2-1-4-3-x-7-8-6                                                                                       |
| 332290352      | <i>Gallibacterium_anatis_UMN179_uid66567</i>             | CAS-III-A                                              | csm3g7-csm4g5-x-x-csm3g7-6-csx16-csx1-csx1-2-1-2                                                      |
| 283783235      | <i>Gardnerella_vaginalis_409_05_uid43211</i>             | CAS-I-E                                                | 3 + 3HD-8e-cse2SS-7-5-6e-1-2                                                                          |
| 311114560      | <i>Gardnerella_vaginalis_ATCC_14019_uid55487</i>         | CAS-I-E                                                | 3 + 3HD-x-8e-cse2SS-7-5-6e-1-2                                                                        |
| 297529736      | <i>Geobacillus_C56_T3_uid49467</i>                       | CAS-I-B                                                | 6-8a1-7-5-3 + 3HD-4-1-2                                                                               |
| 239825879      | <i>Geobacillus_WCH70_uid59045</i>                        | CAS-III-B                                              | 8-x-5-3-4-1-2-6-csm6-csx1-cmr1g7-10-cmr3g5-cmr4g7-cmr5SS-cmr6g7                                       |
| 319765457      | <i>Geobacillus_Y412MC52_uid55381</i>                     | CAS-III-B                                              | 8-x-5-3 + 3HD-4-1-2-6-csm6-csx1-cmr1g7-10-cmr3g5-cmr4g7-cmr5SS-cmr6g7                                 |
| 261418641      | <i>Geobacillus_Y412MC61_uid41171</i>                     | CAS-III-B                                              | 8-x-5-3 + 3HD-4-1-2-6-csm6-csx1-cmr1g7-10-cmr3g5-cmr4g7-cmr5SS-cmr6g7                                 |
| 312110562      | <i>Geobacillus_Y4_1MC1_uid55779</i>                      | CAS-I-B                                                | csm6-x-6-8a1-7-5-3-4-1-2                                                                              |
| 312112401      | <i>Geobacillus_Y4_1MC1_uid55779</i>                      | CAS-I-B                                                | 6-2-1-4-3 + 3HD-5-x-8                                                                                 |
| 336235012      | <i>Geobacillus_thermoglucosidasius_C56_YS93_uid48129</i> | CAS-I-B                                                | 6-8a1 + x-7-5-3-4-1-2                                                                                 |
| 336236852      | <i>Geobacillus_thermoglucosidasius_C56_YS93_uid48129</i> | CAS-I-B                                                | 6-2-1-4-3 + 3HD-5-x-8                                                                                 |
| 222056492      | <i>Geobacter_FRC_32_uid58543</i>                         | CAS-I-C                                                | 2-1-4-x-7-8c-5-3                                                                                      |
| 189425531      | <i>Geobacter_lovleyi_SZ_uid58713</i>                     | CAS-I-E                                                | 2-x-1-6e-5-7-cse2SS-8e-3                                                                              |
| 404495934      | <i>Geobacter_metallireducens_GS_15_uid57731</i>          | CAS-I-C                                                | 3-5-8c-7-x-x-4-x-1-2                                                                                  |
| 409911919      | <i>Geobacter_sulfurreducens_KN400_uid161977</i>          | CAS-I-E                                                | 3 + 3HD-8e-cse2SS-7-5-6e-x-x-1-2                                                                      |
| 39995168       | <i>Geobacter_sulfurreducens_PCA_uid57743</i>             | CAS-I-U                                                | 3-8-csb1-csb2-x-x-1 + 4-2                                                                             |
| 39996494       | <i>Geobacter_sulfurreducens_PCA_uid57743</i>             | CAS-I-E                                                | 3 + 3HD-8e-cse2SS-7-5-6e-x-x-1-2                                                                      |
| 148262910      | <i>Geobacter_uraniireducens_Rf4_uid58475</i>             | CAS-I-E                                                | 3-8e-cse2SS-6e-7-5-x-x-x-1-x-2                                                                        |
| 434393783      | <i>Gloeocapsa_PCC_7428_uid183112</i>                     | CAS-I                                                  | 6-3 + 3HD-x-7-5-1 + 4-2                                                                               |
| 434395286      | <i>Gloeocapsa_PCC_7428_uid183112</i>                     | CAS-I-D                                                | 3-10d-csc2g7-csc1g5-20G-6-4-1-2                                                                       |
| 209542526      | <i>Gluconacetobacter_diazotrophicus_PAI_5_uid59075</i>   | CAS-II                                                 | 9-x-1-2                                                                                               |
| 209542604      | <i>Gluconacetobacter_diazotrophicus_PAI_5_uid59075</i>   | CAS-I-E                                                | 2-1-6e-5-7-cse2SS-8e-3 + 3HD                                                                          |
| 209543797      | <i>Gluconacetobacter_diazotrophicus_PAI_5_uid59075</i>   | CAS-I-C                                                | 3-x-x-5-8c-7-4-1-2                                                                                    |
| 162145897      | <i>Gluconacetobacter_diazotrophicus_PAI_5_uid61587</i>   | CAS-I-C                                                | 2-1-4-7-8c-5-x-x-3                                                                                    |
| 162147908      | <i>Gluconacetobacter_diazotrophicus_PAI_5_uid61587</i>   | CAS-II                                                 | 9-1-2                                                                                                 |
| 162147988      | <i>Gluconacetobacter_diazotrophicus_PAI_5_uid61587</i>   | CAS-I-E                                                | 2-1-6e-5-7-cse2SS-8e-3 + 3HD                                                                          |
| 347759998      | <i>Gluconacetobacter_xylinus_NBRC_3288_uid46523</i>      | CAS-I-E                                                | 2-1-6e-5-7-cse2SS-8e-3 + 3HD                                                                          |
| 414341117      | <i>Gluconobacter_oxydans_H24_uid179202</i>               | CAS-I-E                                                | 3 + 3HD-x-8e-cse2SS-7-5-6e-1-2                                                                        |
| 378719041      | <i>Gordonia_polyisoprenivorans_VH2_uid86651</i>          | CAS-I-U                                                | 2-1 + 4-csb2-csb1-8-3                                                                                 |
| 114328039      | <i>Granulibacter_bethesdensis_CGDNIH1_uid58661</i>       | CAS-I-E                                                | 2-1-6e-5-7-cse2SS-8e-3 + 3HD                                                                          |

Table S1 | Continued

| Cas1 GI number | Organism                                             | Automatically assigned CRISPR-Cas system (CAS) subtype | CRISPR-Cas-related gene neighbours (1, 2, 3, 4, 5, 6, 7, 8, 9 and 10 are respective <i>cas</i> genes) |
|----------------|------------------------------------------------------|--------------------------------------------------------|-------------------------------------------------------------------------------------------------------|
| 114328362      | <i>Granulibacter_bethesdensis_CGDNIH1_uid58661</i>   | CAS-I-E                                                | 3 + 3HD-8e-cse2SS-7-5-6e-1-2                                                                          |
| 345430423      | <i>Haemophilus_parainfluenzae_T3T1_uid72801</i>      | CAS-II                                                 | 9-1-2                                                                                                 |
| 83645586       | <i>Hahella_chejuensis_KCTC_2396_uid58483</i>         | CAS-I-C                                                | 3 + 3HD-5-8c-7-4-1-2                                                                                  |
| 312143828      | <i>Halanaerobium_hydrogeniformans_uid60191</i>       | CAS-I-B                                                | 4-2-1-3 + 3HD-5-x-8                                                                                   |
| 262198025      | <i>Haliangium_ochraceum_DSM_14365_uid41425</i>       | CAS-I-U                                                | csb1-csb2-3-x-1 + 4-2                                                                                 |
| 332662474      | <i>Haliscomenobacter_hydrossis_DSM_1100_uid66777</i> | CAS-I                                                  | 6-8a1-7-5-3 + 3HD-4-1-2                                                                               |
| 332668016      | <i>Haliscomenobacter_hydrossis_DSM_1100_uid66777</i> | Unknown                                                | RT-1-PDEDXK-2                                                                                         |
| 332661941      | <i>Haliscomenobacter_hydrossis_DSM_1100_uid66777</i> | CAS-III-B                                              | 2-1-x-RT-cmr6g7-x-cmr4g7-cmr3g5-10                                                                    |
| 344209644      | <i>Haloarcula_hispanica_ATCC_33960_uid72475</i>      | CAS-I-B                                                | 2-1-4-3 + 3HD-5-7-8b-6                                                                                |
| 55376278       | <i>Haloarcula_marismortui_ATCC_43049_uid57719</i>    | CAS-I-B                                                | 6-8-7-5-3-4-1-2                                                                                       |
| 435853686      | <i>Halobacteroides_halobius_DSM_5150_uid184862</i>   | CAS-I                                                  | 1-2-4-4-x-x-3 + 3HD-x-7-x-6                                                                           |
| 389849193      | <i>Haloferax_mediterranei_ATCC_33500_uid167315</i>   | CAS-I-B                                                | 6-8b-7-5-3 + 3HD-4-1-2                                                                                |
| 292653771      | <i>Haloferax_volcanii_DS2_uid46845</i>               | CAS-I-B                                                | 6-8b-7-5-3 + 3HD-4-1-2                                                                                |
| 257388877      | <i>Halomicrobium_mukohataei_DSM_12286_uid59107</i>   | CAS-I-B                                                | 6-8b-7-5-3 + 3HD-4-1-2                                                                                |
| 307543692      | <i>Halomonas_elongata_DSM_2581_uid52781</i>          | CAS-I-F                                                | 1-3f-8f-5f-7f                                                                                         |
| 385802707      | <i>Haloquadratum_walsbyi_C23_uid162019</i>           | CAS-I-D                                                | R-6-10d-csc2g7-csc1g5-3-4-1-2                                                                         |
| 385803535      | <i>Haloquadratum_walsbyi_C23_uid162019</i>           | CAS-I-B                                                | 6-8b-7-5-3 + 3HD-4-1-2                                                                                |
| 257052525      | <i>Halorhabdus_utahensis_DSM_12940_uid59189</i>      | CAS-I-B                                                | 2-1-4-3 + 3HD-5-7-8b-6                                                                                |
| 121997419      | <i>Halorhodospira_halophila_SL1_uid58473</i>         | CAS-III-B                                              | 1-2-1-2-csx1-csx16-csx1-cmr1g7-10-cmr3g5-cmr4g7-cmr5SS-cmr6g7                                         |
| 222481209      | <i>Halorubrum_lacusprofundi_ATCC_49239_uid58807</i>  | CAS-I-B                                                | 2-1-4-3 + 3HD-5-7-8b-6                                                                                |
| 222481446      | <i>Halorubrum_lacusprofundi_ATCC_49239_uid58807</i>  | CAS-I-D                                                | 6-10d-csc2g7-csc1g5-3-4-1-2                                                                           |
| 428775339      | <i>Halothece_PCC_7418_uid183338</i>                  | CAS-I-D                                                | csm6-csm3g7-x-csm3g7-x-csm3g7-x-6-4-1-2-csc1g5-csc2g7-10d-x-x-x-3                                     |
| 428775953      | <i>Halothece_PCC_7418_uid183338</i>                  | CAS-III-B                                              | 1-2-x-x-10-cmr3g5-cmr4g7-x-cmr1g7 + cmr6g7-csm6-csx1                                                  |
| 220932357      | <i>Halothermothrix_oreni_H_168_uid58585</i>          | CAS-III-B                                              | csm6-cmr6g7 + x-cmr5SS-cmr4g7-cmr3g5-10-cmr1g7-x-4-2-1-3-5-x-8                                        |
| 261855429      | <i>Halothiobacillus_neapolitanus_c2_uid41317</i>     | CAS-I-C                                                | 2-1-x-x-4-7-8c-5-3                                                                                    |
| 386750121      | <i>Helicobacter_cetorum_MIT_00_7128_uid162217</i>    | CAS-III                                                | csm5g7-csx1-x-x-x-x-x-x-2-1                                                                           |
| 386762034      | <i>Helicobacter_cinaedi_PAGU611_uid162219</i>        | CAS-II                                                 | 2-1-9                                                                                                 |
| 291276264      | <i>Helicobacter_mustelae_12198_uid46647</i>          | CAS-II                                                 | 2-1-9                                                                                                 |
| 167628642      | <i>Heliobacterium_modesticaldum_ice1_uid58279</i>    | CAS-I-A                                                | 4-4-2-1-x-6-5-7-x-3                                                                                   |
| 167628317      | <i>Heliobacterium_modesticaldum_ice1_uid58279</i>    | CAS-I-E                                                | 1-5-7-cse2SS-8e-3                                                                                     |
| 159898755      | <i>Herpetosiphon_aurantiacus_DSM_785_uid58599</i>    | CAS-I-D                                                | 10d-csc2g7-csc1g5-3-6-4-1-2                                                                           |
| 159898907      | <i>Herpetosiphon_aurantiacus_DSM_785_uid58599</i>    | Unknown                                                | RT-1-2                                                                                                |
| 159899002      | <i>Herpetosiphon_aurantiacus_DSM_785_uid58599</i>    | CAS-III-A                                              | 10-csm2SS-csm3g7-csm4g5-csm5g7-csx1-x-6-1-2                                                           |
| 159901591      | <i>Herpetosiphon_aurantiacus_DSM_785_uid58599</i>    | CAS-I-A                                                | 8a1-7-5-3 + 3HD-6-1-2-4                                                                               |
| 384129305      | <i>Hydrogenobacter_thermophilus_TK_6_uid159875</i>   | CAS-I-B                                                | 2-1-4-3 + x-5-x-8-6                                                                                   |
| 288818552      | <i>Hydrogenobacter_thermophilus_TK_6_uid45927</i>    | CAS-I-B                                                | 2-1-4-3 + x-5-x-8-6                                                                                   |
| 124027534      | <i>Hyperthermus_butylicus_DSM_5456_uid57755</i>      | CAS-I-A                                                | csaXg8-5-7-csa5SS-R-x-x-4-2-4-1-x-x-x-R                                                               |
| 385809790      | <i>Ignavibacterium_album_JCM_16511_uid162097</i>     | CAS-III-U                                              | csm5g7-x-csx1-csx20-csx1-csx1-x-x-x-1-2                                                               |

Table S1 | Continued

| Cas1 GI number | Organism                                                          | Automatically assigned CRISPR-Cas system (CAS) subtype | CRISPR-Cas-related gene neighbours (1, 2, 3, 4, 5, 6, 7, 8, 9 and 10 are respective <i>cas</i> genes) |
|----------------|-------------------------------------------------------------------|--------------------------------------------------------|-------------------------------------------------------------------------------------------------------|
| 385811610      | <i>Ignavibacterium_album_JCM_16511_uid162097</i>                  | CAS-II                                                 | 9-1-2                                                                                                 |
| 156937861      | <i>Ignicoccus_hospitalis_KIN4_I_uid58365</i>                      | CAS-III                                                | 6-x-x-1                                                                                               |
| 156937921      | <i>Ignicoccus_hospitalis_KIN4_I_uid58365</i>                      | CAS-I-A                                                | 4-1-2-4-3HD-3-x-5-7-csa5SS-R                                                                          |
| 305663330      | <i>Ignisphaera_aggregans_DSM_17230_uid51875</i>                   | CAS-I-A                                                | R-x-7-5-3-3HD-x-6-4-2-1-4                                                                             |
| 310780383      | <i>Ilyobacter_polytropus_DSM_2926_uid59769</i>                    | CAS-II                                                 | 2-1-9                                                                                                 |
| 320102061      | <i>Isosphaera_pallida_ATCC_43644_uid62207</i>                     | CAS-I-U                                                | 1 + 4-2-csb2                                                                                          |
| 310816367      | <i>Ketogulonicigenium_vulgare_Y25_uid59581</i>                    | CAS-I-C                                                | 3 + 3HD-5-8c-7-4-1-2                                                                                  |
| 357387505      | <i>Kitasatospora_setae_KM_6054_uid77027</i>                       | CAS-I-E                                                | 2-1-6e-5-7-cse2SS-8e-3 + 3HD                                                                          |
| 357393350      | <i>Kitasatospora_setae_KM_6054_uid77027</i>                       | CAS-I-E                                                | cse2SS-7-5-6e-1-2                                                                                     |
| 397659651      | <i>Klebsiella_oxytoca_E718_uid170256</i>                          | CAS-I-E                                                | 2-1-6e-5-7-cse2SS-8e-3                                                                                |
| 375259960      | <i>Klebsiella_oxytoca_KCTC_1686_uid83159</i>                      | CAS-I-F                                                | 1-3f-8f-5f-7f-6f                                                                                      |
| 402780419      | <i>Klebsiella_pneumoniae_1084_uid174151</i>                       | CAS-I-E                                                | 3 + 3HD-8e-cse2SS-6e-7-5-1-2                                                                          |
| 238895125      | <i>Klebsiella_pneumoniae_NTUH_K2044_uid59073</i>                  | CAS-I-E                                                | 2-1-5-7-6e-cse2SS-8e-3 + 3HD                                                                          |
| 288933828      | <i>Klebsiella_variicola_At_22_uid42113</i>                        | CAS-I-E                                                | 3-8e-cse2SS-7-5-6e-1-2                                                                                |
| 239617067      | <i>Kosmotoga_olearia_TBF_19_5_1_uid59205</i>                      | Unknown                                                | 2-csm3g7-x-cmr4g7-10-cmr6g7-cmr1g7-2-1-4-3-5-x-8-6                                                    |
| 295697238      | <i>Kyrpidia_tusciae_DSM_2912_uid48361</i>                         | CAS-I-U                                                | 2-1-csb2-7-8x1-3                                                                                      |
| 295697278      | <i>Kyrpidia_tusciae_DSM_2912_uid48361</i>                         | CAS-I-B                                                | 3-5-x-8-x-x-csx1-x-2-1-4-3 + 3HD-5-x-x-6                                                              |
| 385817592      | <i>Lactobacillus_amylovorus_GRL1118_uid160233</i>                 | CAS-I-E                                                | 3-8e-cse2SS-7-5-6e-1-2                                                                                |
| 331702227      | <i>Lactobacillus_buchneri_NRR1_B_30929_uid66205</i>               | CAS-II                                                 | 2-1-9                                                                                                 |
| 406025970      | <i>Lactobacillus_buchneri_uid73657</i>                            | CAS-I-E                                                | 3-8e-cse2SS-7-5-6e-1-2                                                                                |
| 406027702      | <i>Lactobacillus_buchneri_uid73657</i>                            | CAS-II                                                 | 2-1-9                                                                                                 |
| 116493922      | <i>Lactobacillus_casei_ATCC_334_uid57985</i>                      | CAS-I-E                                                | 3 + 3HD-8e-cse2SS-7-5-6e-1-2                                                                          |
| 385824064      | <i>Lactobacillus_casei_BD_II_uid162119</i>                        | CAS-II                                                 | 2-1-9                                                                                                 |
| 191639136      | <i>Lactobacillus_casei_BL23_uid59237</i>                          | CAS-II                                                 | 2-1-9                                                                                                 |
| 385820879      | <i>Lactobacillus_casei_LC2W_uid162121</i>                         | CAS-II                                                 | 2-1-9                                                                                                 |
| 409997998      | <i>Lactobacillus_casei_W56_uid178736</i>                          | CAS-II                                                 | 2-1-9                                                                                                 |
| 301067198      | <i>Lactobacillus_casei_Zhang_uid50673</i>                         | CAS-II                                                 | 2-1-9                                                                                                 |
| 295693070      | <i>Lactobacillus_crispatus_ST1_uid48359</i>                       | CAS-I-E                                                | 2 + x-1-6e-5-7-cse2SS-8e-3 + 3HD                                                                      |
| 104773928      | <i>Lactobacillus_delbrueckii_bulgaricus_ATCC_11842_uid58647</i>   | CAS-I-E                                                | 3-8e-cse2SS-7-5-6e-1-2                                                                                |
| 116513937      | <i>Lactobacillus_delbrueckii_bulgaricus_ATCC_BAA_365_uid57987</i> | CAS-I-E                                                | 3 + 3HD-8e-cse2SS-7-5-6e-1-2                                                                          |
| 313123566      | <i>Lactobacillus_delbrueckii_bulgaricus_ND02_uid60621</i>         | CAS-I-E                                                | 3 + 3HD-8e-cse2SS-7-5-6e-1-2                                                                          |
| 385812192      | <i>Lactobacillus_fermentum_CECT_5716_uid162003</i>                | CAS-I-E                                                | 3 + 3HD-x-8e-7-1                                                                                      |
| 385812491      | <i>Lactobacillus_fermentum_CECT_5716_uid162003</i>                | CAS-I-C                                                | 1-7-8c-5-x-3                                                                                          |
| 184155173      | <i>Lactobacillus_fermentum_IFO_3956_uid58865</i>                  | CAS-I-E                                                | 3 + 3HD-x-8e-cse2SS-7-5-6e-1                                                                          |
| 184155685      | <i>Lactobacillus_fermentum_IFO_3956_uid58865</i>                  | CAS-I-C                                                | 2-1-4-7-8c-5-x-3                                                                                      |
| 161507871      | <i>Lactobacillus_helveticus_DPC_4571_uid58761</i>                 | CAS-I-C                                                | 1-4-7-8c-5-3                                                                                          |
| 385813367      | <i>Lactobacillus_helveticus_H10_uid162017</i>                     | CAS-I-C                                                | 3-5-8c-7-4-1-2                                                                                        |
| 403514602      | <i>Lactobacillus_helveticus_R0052_uid174439</i>                   | CAS-I-C                                                | 3-5-8c-7-4-1-2                                                                                        |
| 385826040      | <i>Lactobacillus_johnsonii_DPC_6026_uid162057</i>                 | CAS-II                                                 | 1-9                                                                                                   |
| 385828838      | <i>Lactobacillus_rhamnosus_GG_uid161983</i>                       | CAS-II                                                 | 2-1-9                                                                                                 |
| 258509198      | <i>Lactobacillus_rhamnosus_GG_uid59313</i>                        | CAS-II                                                 | 2-1-9                                                                                                 |
| 347525458      | <i>Lactobacillus_ruminis_ATCC_27782_uid73417</i>                  | CAS-III-A                                              | 2-1-csm5g7-csm4g5-csm3g7-csm2SS-10-6                                                                  |
| 347525482      | <i>Lactobacillus_ruminis_ATCC_27782_uid73417</i>                  | CAS-I-B                                                | 1-4-3-5-7-8a1-6                                                                                       |
| 385839901      | <i>Lactobacillus_salivarius_CECT_5713_uid162005</i>               | CAS-II-A                                               | 9-9-x-1-csn2                                                                                          |
| 90961086       | <i>Lactobacillus_salivarius_UCC118_uid58233</i>                   | CAS-II-A                                               | 9-x-x-1-2-csn2                                                                                        |
| 347534531      | <i>Lactobacillus_sanfranciscensis_TMW_1_1304_uid72937</i>         | CAS-II                                                 | 2-1-9                                                                                                 |

Table S1 | Continued

| Cas1 GI number | Organism                                                           | Automatically assigned CRISPR-Cas system (CAS) subtype | CRISPR-Cas-related gene neighbours (1, 2, 3, 4, 5, 6, 7, 8, 9 and 10 are respective cas genes) |
|----------------|--------------------------------------------------------------------|--------------------------------------------------------|------------------------------------------------------------------------------------------------|
| 296106563      | Legionella_pneumophila_2300_99_Alcoy_uid48801                      | CAS-I-F                                                | 20G-x-x-x-x-1-3 + 3f-x-x-6f                                                                    |
| 54292958       | Legionella_pneumophila_Lens_uid58209                               | CAS-I-F                                                | 6f-7f-5f-8f-3f-1                                                                               |
| 54295747       | Legionella_pneumophila_Lens_uid58209                               | CAS-I-F                                                | 1-3f-8f-5f-7f-6f                                                                               |
| 54296139       | Legionella_pneumophila_Paris_uid58211                              | CAS-II-B                                               | 9-1-2-4                                                                                        |
| 116331946      | Leptospira_borgpetersenii_serovar_Hardjo_bovis_JB197_uid58509      | CAS-I-E                                                | 3 + 3HD-8e-cse2SS-7-5-6e-x-1-2                                                                 |
| 116327441      | Leptospira_borgpetersenii_serovar_Hardjo_bovis_L550_uid58507       | CAS-I-E                                                | 2-1-x-6e-5-7-cse2SS-8e-3 + 3HD                                                                 |
| 45656830       | Leptospira_interrogans_serovar_Copenhageni_Fiocruz_L1_130_uid58065 | CAS-I-C                                                | 5-7-8c + 8c2-3 + 3HD-6-x-2-1-4                                                                 |
| 294828260      | Leptospira_interrogans_serovar_Lai_56601_uid57881                  | CAS-I-C                                                | 1 + 4-2-x-x-6-3-8c-7-5                                                                         |
| 386075004      | Leptospira_interrogans_serovar_Lai_IPAV_uid161957                  | CAS-I-C                                                | 1 + 4-2-x-x-6-3 + 3HD-8c + 8c2-7-5                                                             |
| 171057839      | Leptothrix_cholodnii_SP_6_uid58971                                 | CAS-I-C                                                | 2-1-4-x-x-7-8c-5-3 + 3HD                                                                       |
| 257125579      | Leptotrichia_buccalis_C_1013_b_uid59211                            | CAS-I-B                                                | 2-1-4-3 + 3HD-5-7-8a1-6                                                                        |
| 257125862      | Leptotrichia_buccalis_C_1013_b_uid59211                            | CAS-III                                                | csm3g7-6-x-x-x-x-x-4-2-1-x-x-csx1-csx20                                                        |
| 406600270      | Leuconostoc_gelidum_JB7_uid175682                                  | CAS-II-A                                               | csn2-2-1-9                                                                                     |
| 347547913      | Listeria_ivanovii_PAM_55_uid73473                                  | CAS-I                                                  | 6-8a1-7-5-3-4-1-2                                                                              |
| 386044901      | Listeria_monocytogenes_10403S_uid54461                             | CAS-II-A                                               | csn2-2-1-9                                                                                     |
| 386052779      | Listeria_monocytogenes_Finland_1998_uid54443                       | CAS-I-B                                                | 6-8 + 8a1-7-5-3-4-1-2                                                                          |
| 386048323      | Listeria_monocytogenes_J0161_uid54459                              | CAS-II-A                                               | csn2-2-1-9                                                                                     |
| 405756713      | Listeria_monocytogenes_SLCC2540_uid175106                          | CAS-II-A                                               | csn2-2-1-9                                                                                     |
| 404282158      | Listeria_monocytogenes_SLCC2755_uid52455                           | CAS-II-A                                               | csn2-2-1-9                                                                                     |
| 404411843      | Listeria_monocytogenes_SLCC5850_uid175110                          | CAS-II-A                                               | csn2-2-1-9                                                                                     |
| 404287972      | Listeria_monocytogenes_serotype_7_SLCC2482_uid174871               | CAS-II-A                                               | csn2-2-1-9                                                                                     |
| 289433792      | Listeria_seeligeri_serovar_1_2b_SLCC3954_uid46215                  | CAS-I-B                                                | 6-8 + 8a1-7-5-3-4-1-2                                                                          |
| 117926798      | Magnetococcus_MC_1_uid57833                                        | CAS-I-C                                                | 3 + 3HD-5-8c-7-4-1-2                                                                           |
| 332982754      | Mahella_australiensis_50_1_BON_uid66917                            | CAS-I-B                                                | 2-1-4-3-5-x-8-6                                                                                |
| 52425036       | Mannheimia_succiniciproducens_MBEL55E_uid58197                     | CAS-I-C                                                | 2-1-x-x-x-4-7-8c-5-x-x-3 + 3HD                                                                 |
| 52425690       | Mannheimia_succiniciproducens_MBEL55E_uid58197                     | CAS-III-U                                              | 2-1-2-x-csx1-csx1-csx16-x-6                                                                    |
| 328949815      | Marinithermus_hydrothermalis_DSM_14884_uid65783                    | CAS-I-C                                                | 3 + 3HD-5-8c-7-4-1-2                                                                           |
| 328950501      | Marinithermus_hydrothermalis_DSM_14884_uid65783                    | CAS-I-E                                                | 3 + 3HD-8e-cse2SS-7-5-6e-1-2                                                                   |
| 328951570      | Marinithermus_hydrothermalis_DSM_14884_uid65783                    | CAS-I                                                  | 6-8a1-x-3 + 3HD-4-1-2                                                                          |
| 374339292      | Marinitoga_piezophila_KA3_uid81629                                 | CAS-I                                                  | 6-8a1-7-5-3-4-1-2                                                                              |
| 374339409      | Marinitoga_piezophila_KA3_uid81629                                 | CAS-III-B                                              | Prim2 + x-1-2-x-csx1 + x-csm6-6-cmr6g7-cmr5SS-cmr4g7-cmr3g5-10                                 |
| 152997544      | Marinomonas_MWYL1_uid58715                                         | CAS-I-E                                                | 2-1-x-6e-5-7-cse2SS-8e-3                                                                       |
| 326793969      | Marinomonas_mediterranea_MMB_1_uid64753                            | CAS-III-B                                              | 2-6-x-x-cmr6g7-cmr5SS-cmr4g7-cmr3g5-10-cmr1g7                                                  |
| 326796560      | Marinomonas_mediterranea_MMB_1_uid64753                            | CAS-I-F                                                | 6f-7f-5f-8f-x-3f-1                                                                             |
| 348026605      | Megasphaera_elsdenii_DSM_20460_uid71135                            | CAS-III-A                                              | 1-2-10-csm2SS-csm3g7-csm4g5-csm5g7-6-csm6                                                      |
| 348026839      | Megasphaera_elsdenii_DSM_20460_uid71135                            | CAS-I-C                                                | 4-1-2                                                                                          |
| 348027012      | Megasphaera_elsdenii_DSM_20460_uid71135                            | CAS-I-F                                                | 3f-1-6f-7f-5f-8f                                                                               |
| 291294626      | Meiothermus_ruber_DSM_1279_uid46661                                | CAS-III-A                                              | 10-csm2SS-csm3g7-csm4g5-csm5g7-x-x-6-csx1-1-2-x-csx1                                           |

Table S1 | Continued

| Cas1 GI number | Organism                                                | Automatically assigned CRISPR-Cas system (CAS) subtype | CRISPR-Cas-related gene neighbours (1, 2, 3, 4, 5, 6, 7, 8, 9 and 10 are respective <i>cas</i> genes) |
|----------------|---------------------------------------------------------|--------------------------------------------------------|-------------------------------------------------------------------------------------------------------|
| 291295861      | <i>Meiothermus_ruber</i> _DSM_1279_uid46661             | CAS-III-B                                              | 2-1-4-csm6-cmr6g7-cmr5SS-cmr4g7-cmr3g5-10-cmr1g7-7-8c                                                 |
| 291297379      | <i>Meiothermus_ruber</i> _DSM_1279_uid46661             | CAS-I-E                                                | 2-1-6e-5-7-x-cse2SS-8e-3                                                                              |
| 297565159      | <i>Meiothermus_silvanus</i> _DSM_9946_uid49485          | CAS-III-A                                              | 10-csm2SS-csm3g7-csm4g5-csm5g7-x-x-6-csx1-1-2-csx1                                                    |
| 297565669      | <i>Meiothermus_silvanus</i> _DSM_9946_uid49485          | CAS-I-E                                                | 3 + 3HD-x-8e-cse2SS-x-7-5-6e-1-2                                                                      |
| 297567720      | <i>Meiothermus_silvanus</i> _DSM_9946_uid49485          | CAS-III-B                                              | DinG + x-x-x-x-x-x-x-2-1-4-csm6-x-csx1-cmr6g7-cmr5SS-cmr4g7-cmr3g5-10-cmr1g7                          |
| 297567845      | <i>Meiothermus_silvanus</i> _DSM_9946_uid49485          | CAS-I                                                  | 2-1-4-x-3 + 3HD-x-7-x-6                                                                               |
| 397689809      | <i>Melioribacter_roseus</i> _P3M_uid170941              | CAS-I-B                                                | 2-1-x-4-3 + 3HD-5-7-x-8a1-6                                                                           |
| 397690169      | <i>Melioribacter_roseus</i> _P3M_uid170941              | CAS-II                                                 | 2-1                                                                                                   |
| 332687143      | <i>Melissococcus_plutonium</i> _ATCC_35311_uid66803     | CAS-I-C                                                | 2-1-4-4-7-8c-5-x-3-3HD                                                                                |
| 379726963      | <i>Melissococcus_plutonium</i> _DAT561_uid89371         | CAS-I-C                                                | 3 + x-5-8c-7-4-1-2                                                                                    |
| 389844445      | <i>Mesotoga_prima</i> _MesG1_Ag_4_2_uid52599            | CAS-III-B                                              | cmr6g7-cmr5SS-cmr4g7-cmr3g5-10-cmr1g7-csm6-2-x-x-1-4-3-5-7                                            |
| 389845095      | <i>Mesotoga_prima</i> _MesG1_Ag_4_2_uid52599            | CAS-III                                                | csm3g7-x-cmr4g7-10 + x-cmr6g7-cmr1g7-2-1-4-3-5-x-8-6                                                  |
| 330834963      | <i>Metallosphaera_cuprina</i> _Ar_4_uid66329            | CAS-I                                                  | 1-2-x-4-4-x-csx1                                                                                      |
| 146303916      | <i>Metallosphaera_sedula</i> _DSM_5348_uid58717         | CAS-I-A                                                | 6-x-csaXg8-x-3-5-7-csa5SS-R-4-1-x-2-4-R-6-csx1-csx1                                                   |
| 333987620      | <i>Methanobacterium_SWAN</i> _1_uid67359                | CAS-I-A                                                | 2-1-4-6-3-5-7-8a1                                                                                     |
| 288560055      | <i>Methanobrevibacter_ruminantium</i> _M1_uid45857      | CAS-I                                                  | 6-8a1-x-5-3 + 3HD-4-1-2                                                                               |
| 288560430      | <i>Methanobrevibacter_ruminantium</i> _M1_uid45857      | CAS-III-A                                              | 1-x-2-6-csx1-csm5g7-csm4g5-csm3g7-csm2SS-10                                                           |
| 148642083      | <i>Methanobrevibacter_smithii</i> _ATCC_35061_uid58827  | Unknown                                                | 1-2                                                                                                   |
| 148642224      | <i>Methanobrevibacter_smithii</i> _ATCC_35061_uid58827  | CAS-I-A                                                | 2-1-4-3-5-7-8a1-6                                                                                     |
| 289192644      | <i>Methanocaldococcus_FS406_22</i> _uid42499            | CAS-I-A                                                | 6-x-7-5-3-4-1-csa5SS-7-5-8a2-3-x-R-2                                                                  |
| 256811373      | <i>Methanocaldococcus_fervens</i> _AG86_uid59347        | CAS-I-A                                                | 2-R-x-3-8a2-5-7-csa5SS-1-4-3-5-7-x-6                                                                  |
| 296109603      | <i>Methanocaldococcus_infernus</i> _ME_uid48803         | CAS-I                                                  | 8a1-7-5-3-1-2                                                                                         |
| 296109866      | <i>Methanocaldococcus_infernus</i> _ME_uid48803         | CAS-I-B                                                | 3 + 3HD-5-x-8-1-2-4                                                                                   |
| 15668554       | <i>Methanocaldococcus_jannaschii</i> _DSM_2661_uid57713 | CAS-I-A                                                | 6-3-4-1-R-x-7-5-3-3HD-8a2-2                                                                           |
| 261402133      | <i>Methanocaldococcus_vulcanius</i> _M7_uid41131        | CAS-I-D                                                | 2-1-4-3-csc1g5-csc2g7-10d-R-6                                                                         |
| 147920423      | <i>Methanocella_arvoryzae</i> _MRE50_uid61623           | CAS-I-E                                                | 2-1-6e-5-7-cse2SS-8e-3 + 3HD                                                                          |
| 147921327      | <i>Methanocella_arvoryzae</i> _MRE50_uid61623           | Unknown                                                | 1                                                                                                     |
| 383319612      | <i>Methanocella_conradii</i> _HZ254_uid157911           | CAS-I-A                                                | 4-1-4-2-csa3-x-x-x-x-x-7                                                                              |
| 91772593       | <i>Methanococcoides_burtonii</i> _DSM_6242_uid58023     | Unknown                                                | 1                                                                                                     |
| 91772605       | <i>Methanococcoides_burtonii</i> _DSM_6242_uid58023     | Unknown                                                | 1                                                                                                     |
| 91772613       | <i>Methanococcoides_burtonii</i> _DSM_6242_uid58023     | Unknown                                                | 1                                                                                                     |
| 91772628       | <i>Methanococcoides_burtonii</i> _DSM_6242_uid58023     | CAS-I-E                                                | 3-8e-cse2SS-7-5-6e-1-2                                                                                |
| 91773111       | <i>Methanococcoides_burtonii</i> _DSM_6242_uid58023     | CAS-I-B                                                | 6-x-x-5-3 + 3HD-4-1-2                                                                                 |
| 150401497      | <i>Methanococcus_aeolicus</i> _Nankai_3_uid58823        | CAS-III-A                                              | 6-3-5-7-8-1-2-4-x-csx1-csm5g7-csm4g5-csm3g7-csm2SS-10                                                 |
| 134045811      | <i>Methanococcus_maripaludis</i> _C5_uid58741           | CAS-I-B                                                | 3-5-x-8-1-2-4                                                                                         |
| 340624264      | <i>Methanococcus_maripaludis</i> _X1_uid70729           | CAS-I-B                                                | 3 + 3HD-5-7-8-1-2-4                                                                                   |



Table S1 | Continued

| Cas1 GI number | Organism                                                | Automatically assigned CRISPR-Cas system (CAS) subtype | CRISPR-Cas-related gene neighbours (1, 2, 3, 4, 5, 6, 7, 8, 9 and 10 are respective <i>cas</i> genes) |
|----------------|---------------------------------------------------------|--------------------------------------------------------|-------------------------------------------------------------------------------------------------------|
| 150398872      | Methanococcus_vannielii_SB_uid58767                     | CAS-III-B                                              | 10-cmr3g5-cmr4g7-cmr5SS-cmr6g7-x-x-6-1-2                                                              |
| 150398983      | Methanococcus_vannielii_SB_uid58767                     | CAS-I-B                                                | 4-2-1-8-7-5-3 + 3HD                                                                                   |
| 297619051      | Methanococcus_voltae_A3_uid49529                        | CAS-III-B                                              | 4-2-1-8-7-5-3 + 3HD-x-x-cmr6g7-cmr5SS-cmr4g7-cmr3g5                                                   |
| 297619085      | Methanococcus_voltae_A3_uid49529                        | CAS-III-B                                              | cmr6g7-cmr5SS-cmr4g7-x-cmr3g5-10-cmr1g7-2-1-4-3-5-7-x-8b-6                                            |
| 124485266      | Methanocorpusculum_labreanum_Z_uid58785                 | Unknown                                                | 1                                                                                                     |
| 124485674      | Methanocorpusculum_labreanum_Z_uid58785                 | CAS-I-C                                                | 7-8c-5-3 + 3HD-4-1-2                                                                                  |
| 397780289      | Methanoculleus_bourgensis_MS2_uid171377                 | Unknown                                                | 1                                                                                                     |
| 397781631      | Methanoculleus_bourgensis_MS2_uid171377                 | CAS-I-U                                                | 3-8x1-7-csb2-1 + 4                                                                                    |
| 126178701      | Methanoculleus_marisnigri_JR1_uid58561                  | Unknown                                                | 1                                                                                                     |
| 294495965      | Methanohalophilus_mahii_DSM_5219_uid47313               | Unknown                                                | 1                                                                                                     |
| 410669380      | Methanobolus_psychrophilus_R15_uid177925                | Unknown                                                | 1                                                                                                     |
| 410669394      | Methanobolus_psychrophilus_R15_uid177925                | Unknown                                                | 1                                                                                                     |
| 435851317      | Methanomethylovorans_hollandica_DSM_15978_uid184864     | CAS-III-B                                              | 1-2-4-x-x-x-cmr1g7-csm3g7-10-cmr4g7                                                                   |
| 307352568      | Methanoplanus_petrolearius_DSM_11571_uid52695           | Unknown                                                | 1                                                                                                     |
| 20094748       | Methanopyrus_kandleri_AV19_uid57883                     | CAS-III-A                                              | 2-x-1-x-10-csm2SS-csm3g7-csm4g5-csx1-csm5g7                                                           |
| 154150254      | Methanoregula_boonei_6A8_uid58815                       | Unknown                                                | 1                                                                                                     |
| 432331395      | Methanoregula_formicicum_SMSP_uid184406                 | Unknown                                                | 1                                                                                                     |
| 432331519      | Methanoregula_formicicum_SMSP_uid184406                 | CAS-I-B                                                | 4-2-1-x-3-5-x-8-x-x-DinG                                                                              |
| 432331857      | Methanoregula_formicicum_SMSP_uid184406                 | Unknown                                                | 1                                                                                                     |
| 432332081      | Methanoregula_formicicum_SMSP_uid184406                 | CAS-I-C                                                | 2-1-4-7-8c-5-3 + 3HD                                                                                  |
| 330508932      | Methanosaeta_concilii_GP6_uid66207                      | CAS-I-B                                                | 3 + 3HD-5-x-8-4-2-1                                                                                   |
| 330509017      | Methanosaeta_concilii_GP6_uid66207                      | CAS-I-A                                                | 4-4-2-1-3-x-x-x-x-5                                                                                   |
| 386002385      | Methanosaeta_harundinacea_6Ac_uid81199                  | CAS-III-B                                              | 1 + 4-2-x-csx3-x-cmr6g7-cmr5SS-cmr4g7-cmr3g5-10-cmr1g7                                                |
| 116754851      | Methanosaeta_thermophila_PT_uid58469                    | CAS-I-D                                                | csc2g7-csc1g5-3-4-1-2-R-6                                                                             |
| 336477473      | Methanosalsum_zhilinae_DSM_4017_uid68249                | CAS-I-E                                                | 2-1-6e-5-7-cse2SS-8e-3                                                                                |
| 20092470       | Methanosarcina_acetivorans_C2A_uid57879                 | CAS-I-A                                                | 3-5-7-8a1-2-1-4-6                                                                                     |
| 73667852       | Methanosarcina_barkeri_Fusaro_uid57715                  | CAS-I-A                                                | 6-4-1-2-x-8a1-7-5-3                                                                                   |
| 73670571       | Methanosarcina_barkeri_Fusaro_uid57715                  | CAS-I-U                                                | 2-1 + 4-csb2-csb1-8x1-3 + 3HD                                                                         |
| 21226661       | Methanosarcina_mazei_Go1_uid57893                       | CAS-I-B                                                | 4-2-1-6-3-5-7-8-csa3                                                                                  |
| 21229351       | Methanosarcina_mazei_Go1_uid57893                       | Unknown                                                | 1                                                                                                     |
| 84489236       | Methanosphaera_stadtmanae_DSM_3091_uid58407             | CAS-I-B                                                | 6-8-7-5-3-4-1-2                                                                                       |
| 84489745       | Methanosphaera_stadtmanae_DSM_3091_uid58407             | CAS-I                                                  | 8a1-x-5-3 + 3HD-6-4-1-2                                                                               |
| 219852205      | Methanosphaerula_palustris_E1_9c_uid59193               | CAS-I-E                                                | 2-1-6e-5-7-cse2SS-8e-3                                                                                |
| 219852754      | Methanosphaerula_palustris_E1_9c_uid59193               | Unknown                                                | 1                                                                                                     |
| 88602029       | Methanospirillum_hungatei_JF_1_uid58181                 | CAS-III-A                                              | csx1-x-x-x-csx1-csx1-x-x-2-1-x-x-csm3g7-csm3g7-x-x-csm3g7-csm3g7-10                                   |
| 88602656       | Methanospirillum_hungatei_JF_1_uid58181                 | CAS-I-E                                                | 2-1-6e-5-7-cse2SS-8e                                                                                  |
| 88603116       | Methanospirillum_hungatei_JF_1_uid58181                 | CAS-I-D                                                | 2-1-4-x-3-csc1g5-csc2g7-10d-6-R                                                                       |
| 15679095       | Methanothermobacter_thermautotrophicus_Delta_H_uid57877 | CAS-III-A                                              | csx1-csm5g7-csm5g7-csm4g5-csm3g7-csm2SS-10-2-1-4-3-5-7-x-x-6                                          |
| 336121113      | Methanothermococcus_okinawensis_IH1_uid51535            | CAS-I-D                                                | 6-2-1-4-3-csc1g5-csc2g7-10d                                                                           |

Table S1 | Continued

| Cas1 GI number | Organism                                               | Automatically assigned CRISPR-Cas system (CAS) subtype | CRISPR-Cas-related gene neighbours (1, 2, 3, 4, 5, 6, 7, 8, 9 and 10 are respective <i>cas</i> genes) |
|----------------|--------------------------------------------------------|--------------------------------------------------------|-------------------------------------------------------------------------------------------------------|
| 333910103      | <i>Methanoterris_igneus_Kol_5_uid67321</i>             | CAS-I-D                                                | R-10d-csc2g7-csc1g5-3-4-1-2                                                                           |
| 91774961       | <i>Methylobacillus_flagellatus_KT_uid58049</i>         | CAS-I-C                                                | 3 + x-5-8c-7-4-1-2                                                                                    |
| 220925254      | <i>Methylobacterium_nodulans_OR5_2060_uid59023</i>     | CAS-I-E                                                | 2-1-6e-5-7-cse2SS-8e-3 + 3HD                                                                          |
| 53804988       | <i>Methylococcus_capsulatus_Bath_uid57607</i>          | CAS-I-C                                                | 2-1-4-x-7-8c-5-3 + 3HD                                                                                |
| 53804737       | <i>Methylococcus_capsulatus_Bath_uid57607</i>          | CAS-I-E                                                | 2-1-6e-5-7-cse2SS-8e-3                                                                                |
| 357404710      | <i>Methylomicrobium_alcaliphilum_uid77119</i>          | CAS-I-C                                                | 3-5-8c-7-4-1-2                                                                                        |
| 357405511      | <i>Methylomicrobium_alcaliphilum_uid77119</i>          | CAS-I-C                                                | 2-1-4-7-8c-5-3 + 3HD                                                                                  |
| 357407021      | <i>Methylomicrobium_alcaliphilum_uid77119</i>          | CAS-I-E                                                | 2-1-x-x-x-x-x-x-x-6e-5-7                                                                              |
| 333983108      | <i>Methylomonas_methanica_MC09_uid67363</i>            | CAS-I-F                                                | 1-3f-8f-5f-7f-6f                                                                                      |
| 333984705      | <i>Methylomonas_methanica_MC09_uid67363</i>            | CAS-I-C                                                | 3 + x-x-5-8c-7-x-4-1-2                                                                                |
| 387128443      | <i>Methylophaga_JAM1_uid162947</i>                     | CAS-I-F                                                | 6f-x-x-3 + 3f-1                                                                                       |
| 387130001      | <i>Methylophaga_JAM7_uid162949</i>                     | CAS-I-F                                                | 6f-7f-5f-8f-3f-1                                                                                      |
| 428311522      | <i>Microcoleus_PCC_7113_uid183114</i>                  | CAS-I-D                                                | 2-1-4-6-x-3-csc1g5-csc2g7                                                                             |
| 428314604      | <i>Microcoleus_PCC_7113_uid183114</i>                  | CAS-III-A                                              | 1 + x-1-2-x-x-x-csx1-6 + x-x-csm3g7-x-csm3g7                                                          |
| 428314605      | <i>Microcoleus_PCC_7113_uid183114</i>                  | CAS-III-A                                              | 1 + x-1-2-x-x-x-csx1-6 + x-x-csm3g7-x-csm3g7                                                          |
| 428314640      | <i>Microcoleus_PCC_7113_uid183114</i>                  | Unknown                                                | 6-x-x-4-1 + 2                                                                                         |
| 166365827      | <i>Microcystis_aeruginosa_NIES_843_uid59101</i>        | CAS-I                                                  | 5-3-x-x-x-x-6-4-1-2                                                                                   |
| 336116789      | <i>Microlunatus_phosphovorius_NM_1_uid68055</i>        | CAS-III-A                                              | 10-csm3g7-cmr3g5-csm3g7-x-x-x-6-1 + RT-2-x-10-csm3g7-cmr3g5-csm3g7                                    |
| 298345382      | <i>Mobiluncus_curtisii_ATCC_43063_uid49695</i>         | CAS-I-E                                                | 2-1-6e-5-3HD + 7                                                                                      |
| 83589357       | <i>Moorella_thermoacetica_ATCC_39073_uid58051</i>      | CAS-I-C                                                | 2-1-4-7-8c-5-3 + 3HD                                                                                  |
| 83590562       | <i>Moorella_thermoacetica_ATCC_39073_uid58051</i>      | CAS-I-B                                                | 2-1-4-3-5-7-8a1-6                                                                                     |
| 296112254      | <i>Moraxella_catarrhalis_RH4_uid48809</i>              | CAS-I-F                                                | 1-3f-8f-5f-7f-6f                                                                                      |
| 339632828      | <i>Mycobacterium_africanum_GM041182_uid68839</i>       | CAS-III-A                                              | 2-1-csm5g7-csm3g7-csm2SS-10-6                                                                         |
| 31793993       | <i>Mycobacterium_bovis_AF2122_97_uid57695</i>          | CAS-III-A                                              | 2-1-csm6-csm5g7-csm4g5-csm3g7-csm2SS-10-6                                                             |
| 378772551      | <i>Mycobacterium_bovis_BCG_Mexico_uid86889</i>         | CAS-III-A                                              | 2-1-csm6-csm5g7-csm4g5-csm3g7-csm2SS-10-6                                                             |
| 121638696      | <i>Mycobacterium_bovis_BCG_Pasteur_1173P2_uid58781</i> | CAS-III-A                                              | 2-1-csm6-csm5g7-csm4g5-csm3g7-csm2SS-10-6                                                             |
| 224991188      | <i>Mycobacterium_bovis_BCG_Tokyo_172_uid59281</i>      | CAS-III-A                                              | 2-1-csm6-csm5g7-csm4g5-csm3g7-csm2SS-10-6                                                             |
| 340627813      | <i>Mycobacterium_canettii_CIPT_140010059_uid70731</i>  | CAS-III-A                                              | 2-1-csm6-csm5g7-csm4g5-csm3g7-csm2SS-10                                                               |
| 433627935      | <i>Mycobacterium_canettii_CIPT_140060008_uid184829</i> | CAS-III-A                                              | 2-1-csm6-csm5g7-csm4g5-csm3g7-csm2SS-10-6                                                             |
| 433643006      | <i>Mycobacterium_canettii_CIPT_140070008_uid184832</i> | CAS-I-U                                                | 2-1 + 4-csb2-7-8x1-3                                                                                  |
| 433631663      | <i>Mycobacterium_canettii_CIPT_140070010_uid184828</i> | CAS-I-C                                                | 2-1-4-7-8c-5-3                                                                                        |
| 433631914      | <i>Mycobacterium_canettii_CIPT_140070010_uid184828</i> | CAS-I-U                                                | 2-1 + 4-csb2-csb1-8x1-3                                                                               |
| 433635878      | <i>Mycobacterium_canettii_CIPT_140070017_uid184830</i> | CAS-I-U                                                | 2-1 + 4-csb2-7-8x1-3 + 3HD                                                                            |
| 15842358       | <i>Mycobacterium_tuberculosis_CDC1551_uid57775</i>     | CAS-III-A                                              | 2-1-csm6-csm5g7-csm4g5-csm3g7-csm2SS-10-6                                                             |
| 385999602      | <i>Mycobacterium_tuberculosis_CTRL_2_uid161997</i>     | CAS-III-A                                              | 2-1-csm6-csm5g7-csm4g5-csm3g7-csm2SS-10-6                                                             |
| 148824006      | <i>Mycobacterium_tuberculosis_F11_uid58417</i>         | CAS-III-A                                              | 2-1-csm6-csm5g7-csm4g5-csm3g7-csm2SS-10-6                                                             |

**Table S1 | Continued**

| Cas1 GI number | Organism                                                      | Automatically assigned CRISPR-Cas system (CAS) subtype | CRISPR-Cas-related gene neighbours (1, 2, 3, 4, 5, 6, 7, 8, 9 and 10 are respective <i>cas</i> genes) |
|----------------|---------------------------------------------------------------|--------------------------------------------------------|-------------------------------------------------------------------------------------------------------|
| 148662659      | <i>Mycobacterium_tuberculosis_H37Ra_uid58853</i>              | CAS-III-A                                              | 2-1-csm6-csm5g7-csm4g5-csm3g7-csm2S5-10-6                                                             |
| 397674731      | <i>Mycobacterium_tuberculosis_H37Rv_uid170532</i>             | CAS-III-A                                              | 2-1-csm6-csm5g7-csm4g5-csm3g7-csm2S5-10-6                                                             |
| 15609954       | <i>Mycobacterium_tuberculosis_H37Rv_uid57777</i>              | CAS-III-A                                              | 2-1-csm6-csm5g7-csm4g5-csm3g7-csm2S5-10-6                                                             |
| 253798098      | <i>Mycobacterium_tuberculosis_KZN_1435_uid59069</i>           | CAS-III-A                                              | 6-10-csm2S5-csm3g7-csm4g5-csm5g7-csm6-1-2                                                             |
| 375295366      | <i>Mycobacterium_tuberculosis_KZN_4207_uid83619</i>           | CAS-III-A                                              | 6-10-csm2S5-csm3g7-csm4g5-csm5g7-csm6-1-2                                                             |
| 392431574      | <i>Mycobacterium_tuberculosis_KZN_605_uid54947</i>            | CAS-III-A                                              | 6-10-csm2S5-csm3g7-csm4g5-csm5g7-csm6-1-2                                                             |
| 383308570      | <i>Mycobacterium_tuberculosis_RGTB327_uid157907</i>           | CAS-III-A                                              | 2-1-csm6-csm5g7-csm4g5-csm3g7-csm2S5-10-6                                                             |
| 386005689      | <i>Mycobacterium_tuberculosis_RGTB423_uid162179</i>           | CAS-III-A                                              | 2-1-csm6-csm5g7-csm3g7-csm2S5-10-6                                                                    |
| 392387446      | <i>Mycobacterium_tuberculosis_UT205_uid162183</i>             | CAS-III-A                                              | 2-1-csm6-csm5g7-csm4g5-csm3g7-csm2S5-10-6                                                             |
| 193216853      | <i>Mycoplasma_arthritis_158L3_1_uid58005</i>                  | CAS-II                                                 | 1-2                                                                                                   |
| 433625053      | <i>Mycoplasma_cynos_C142_uid184824</i>                        | CAS-II                                                 | 2-1-9                                                                                                 |
| 401771108      | <i>Mycoplasma_gallisepticum_CA06_2006_052_5_2P_uid172630</i>  | CAS-II                                                 | 9-1-2                                                                                                 |
| 385326555      | <i>Mycoplasma_gallisepticum_F_uid162001</i>                   | CAS-II                                                 | 9-1-2                                                                                                 |
| 401767319      | <i>Mycoplasma_gallisepticum_NC95_13295_2_2P_uid172625</i>     | CAS-II                                                 | 9-1-2                                                                                                 |
| 401768091      | <i>Mycoplasma_gallisepticum_NC96_1596_4_2P_uid172626</i>      | CAS-II                                                 | 9-1-2                                                                                                 |
| 401768852      | <i>Mycoplasma_gallisepticum_NY01_2001_047_5_1P_uid172627</i>  | CAS-II                                                 | 9-1-2                                                                                                 |
| 385325799      | <i>Mycoplasma_gallisepticum_R_high_uid161999</i>              | CAS-II                                                 | 9-1-2                                                                                                 |
| 294660601      | <i>Mycoplasma_gallisepticum_R_low_uid57993</i>                | CAS-II                                                 | 9-1-2                                                                                                 |
| 401766564      | <i>Mycoplasma_gallisepticum_VA94_7994_1_7P_uid172624</i>      | CAS-II                                                 | 1-2                                                                                                   |
| 401769599      | <i>Mycoplasma_gallisepticum_WI01_2001_043_13_2P_uid172628</i> | CAS-II                                                 | 9-1-2                                                                                                 |
| 47458867       | <i>Mycoplasma_mobile_163K_uid58077</i>                        | CAS-II                                                 | 1-9                                                                                                   |
| 71894593       | <i>Mycoplasma_synoviae_53_uid58061</i>                        | CAS-II-A                                               | 9-1-2-csn2-1                                                                                          |
| 338531918      | <i>Myxococcus_fulvus_HW_1_uid68443</i>                        | CAS-I-C                                                | 3-5-8c-7-x-4-1-2                                                                                      |
| 442324547      | <i>Myxococcus_stipitatus_DSM_14675_uid186549</i>              | CAS-I-C                                                | 2-1-4-7-8c-5-3                                                                                        |
| 442324860      | <i>Myxococcus_stipitatus_DSM_14675_uid186549</i>              | CAS-III-B                                              | 2-1 + 4-5-7-x-3 + 3HD-6-cmr6g7-cmr5S5-cmr4g7-cmr3g5-10                                                |
| 108763792      | <i>Myxococcus_xanthus_DK_1622_uid58003</i>                    | CAS-I-C                                                | 2-1-4-7-8c-5-3HD                                                                                      |
| 108761389      | <i>Myxococcus_xanthus_DK_1622_uid58003</i>                    | CAS-I-C                                                | 2-1 + 4-5-7-8c + 8c2-3 + 3HD-6                                                                        |
| 258653218      | <i>Nakamurella_multipartita_DSM_44233_uid59221</i>            | CAS-I-E                                                | 2-1-6e-5-7-cse2S5-8e-3 + 3HD                                                                          |
| 41614813       | <i>Nanoarchaeum_equitans_Kin4_M_uid58009</i>                  | CAS-I-B                                                | 2-1-x-7-5-3-4                                                                                         |
| 397772707      | <i>Natrinema_J7_uid171337</i>                                 | CAS-I-B                                                | 6-8b-7-5-3-4-1-2                                                                                      |
| 429193351      | <i>Natronobacterium_gregoryi_SP2_uid74439</i>                 | CAS-I-B                                                | 6-8b-7-5-3 + 3HD-4-1-2                                                                                |
| 76802276       | <i>Natronomonas_pharaonis_DSM_2160_uid58435</i>               | CAS-I-D                                                | R-6-10d-csc2g7-csc1g5-3-4-1-2                                                                         |
| 313668836      | <i>Neisseria_lactamica_020_06_uid60851</i>                    | CAS-I-C                                                | 2-1                                                                                                   |
| 313669045      | <i>Neisseria_lactamica_020_06_uid60851</i>                    | CAS-II                                                 | 9-1-2                                                                                                 |
| 385324781      | <i>Neisseria_meningitidis_8013_uid161967</i>                  | CAS-II                                                 | 9-1-2                                                                                                 |
| 385855844      | <i>Neisseria_meningitidis_M01_240355_uid162075</i>            | CAS-II                                                 | 1-2                                                                                                   |
| 385337434      | <i>Neisseria_meningitidis_WUE_2594_uid162093</i>              | CAS-II                                                 | 2-1-9                                                                                                 |
| 218767587      | <i>Neisseria_meningitidis_Z2491_uid57819</i>                  | CAS-II                                                 | 2-1-9                                                                                                 |
| 254804355      | <i>Neisseria_meningitidis_alpha14_uid61649</i>                | CAS-II                                                 | 2-1-9                                                                                                 |

Table S1 | Continued

| Cas1 GI number | Organism                                            | Automatically assigned CRISPR-Cas system (CAS) subtype | CRISPR-Cas-related gene neighbours (1, 2, 3, 4, 5, 6, 7, 8, 9 and 10 are respective <i>cas</i> genes) |
|----------------|-----------------------------------------------------|--------------------------------------------------------|-------------------------------------------------------------------------------------------------------|
| 319956800      | Nitratifactor_salsuginis_DSM_16511_uid62183         | CAS-I-B                                                | 8-x-5-3 + 3HD-x-x-4-2-1                                                                               |
| 319957207      | Nitratifactor_salsuginis_DSM_16511_uid62183         | CAS-II                                                 | 9-1-2                                                                                                 |
| 75676127       | Nitrobacter_winogradskyi_Nb_255_uid58295            | CAS-I-C                                                | 2-1-4-7-8c-5-3 + 3HD                                                                                  |
| 292491305      | Nitrosococcus_halophilus_Nc4_uid46803               | CAS-I-F                                                | 3f-1-x-5f-7f-6f                                                                                       |
| 292492002      | Nitrosococcus_halophilus_Nc4_uid46803               | CAS-I-C                                                | 3-5-8c-7-4-1-2                                                                                        |
| 292492856      | Nitrosococcus_halophilus_Nc4_uid46803               | CAS-III                                                | csm4g5-csm5g7-x-csx1-x-x-csx1-csx1-x-2-1-x-2                                                          |
| 292492938      | Nitrosococcus_halophilus_Nc4_uid46803               | CAS-I-D                                                | 6-10d-csc2g7-x-3-4-1-2                                                                                |
| 77166205       | Nitrosococcus_oceani_ATCC_19707_uid58403            | CAS-I-F                                                | 3f-1-8f-5f-7f-6f                                                                                      |
| 300114059      | Nitrosococcus_watsonii_C_113_uid50331               | CAS-I-E                                                | 2-1-6e-5-7-cse2SS                                                                                     |
| 300115372      | Nitrosococcus_watsonii_C_113_uid50331               | CAS-I-F                                                | 1-8f-5f-7f-6f                                                                                         |
| 325980970      | Nitrosomonas_AL212_uid55727                         | Unknown                                                | 1                                                                                                     |
| 325982105      | Nitrosomonas_AL212_uid55727                         | CAS-I-C                                                | 2-1-4-x-7-8c-5-3                                                                                      |
| 30248142       | Nitrosomonas_europaea_ATCC_19718_uid57647           | CAS-III                                                | 2-1-2-csx1-x-csx1-csx16-6-x-csm5g7-csm4g5-csm3g7                                                      |
| 114331015      | Nitrosomonas_eutropha_C91_uid58363                  | CAS-I-C                                                | 2-1-4-7-8c                                                                                            |
| 114332190      | Nitrosomonas_eutropha_C91_uid58363                  | CAS-III-A                                              | csm4g5-csm5g7-6-csx16-csx1-x-csx1-x-x-2-1-2                                                           |
| 54026395       | Nocardia_farcinica_IFM_10152_uid58203               | CAS-I-E                                                | 1-6e-5-7-cse2SS-8e-3 + 3HD                                                                            |
| 297560256      | Nocardiosis_dassonvillei_DSM_43111_uid49483         | CAS-I-E                                                | 8e-cse2SS-7-5-6e-1-2                                                                                  |
| 427706868      | Nostoc_PCC_7107_uid182932                           | CAS-I-D                                                | 2-1-4-6-20G-3 + x-csc1g5-csc2g7-10d                                                                   |
| 427708213      | Nostoc_PCC_7107_uid182932                           | CAS-III                                                | csx19-csm3g7-x-x-x-6-x-x-x-2-1-x-x-1 + RT                                                             |
| 427708216      | Nostoc_PCC_7107_uid182932                           | CAS-III                                                | csx19-csm3g7-x-x-x-6-x-x-x-2-1-x-x-1 + RT                                                             |
| 17227877       | Nostoc_PCC_7120_uid57803                            | CAS-III-B                                              | csx18-1-2                                                                                             |
| 17228961       | Nostoc_PCC_7120_uid57803                            | CAS-III-A                                              | 1 + RT-x-x-x-csm3g7-csx19-csm3g7-csm3g7-x-csm3g7-csm3g7                                               |
| 17229060       | Nostoc_PCC_7120_uid57803                            | CAS-I-D                                                | 10d-csc2g7-csc1g5-3-20G-6-4-1-x-2                                                                     |
| 427726427      | Nostoc_PCC_7524_uid182933                           | CAS-III-B                                              | 1-2-10-cmr3g5-cmr4g7-x-cmr1g7 + cmr6g7                                                                |
| 427728185      | Nostoc_PCC_7524_uid182933                           | CAS-I-D                                                | 2-1-4-x-6-20G-x-csc1g5-csc2g7-10d                                                                     |
| 186682976      | Nostoc_punctiforme_PCC_73102_uid57767               | CAS-I-D                                                | 2-1-4-6-20G-3-csc1g5-csc2g7-10d                                                                       |
| 325279973      | Odoribacter_splanchnicus_DSM_20712_uid63397         | CAS-I-B                                                | 2-1-4-3 + 3HD-5-x-x-6                                                                                 |
| 302336019      | Olsenella_uli_DSM_7084_uid51367                     | CAS-II-A                                               | csn2-2-1-9                                                                                            |
| 392391492      | Ornithobacterium_rhinotracheale_DSM_15997_uid168256 | CAS-II                                                 | 2-1-9                                                                                                 |
| 428320277      | Oscillatoria_PCC_7112_uid183110                     | CAS-I-D                                                | csc2g7-csc1g5-3-6-4-1-2                                                                               |
| 428216097      | Oscillatoria_acuminata_PCC_6304_uid183003           | CAS-I-D                                                | csc2g7-csc1g5-3-x-6-4-1-2                                                                             |
| 374323589      | Paenibacillus_terrae_HPL_003_uid82371               | CAS-III-B                                              | 3-5-8c-7-4-1-2-x-x-x-cmr1g7-10-cmr3g5-cmr4g7-cmr5SS-cmr6g7                                            |
| 150007825      | Parabacteroides_distasonis_ATCC_8503_uid58301       | CAS-I-C                                                | 3-5-8c-7-4-1-2                                                                                        |
| 154250554      | Parvibaculum_lavamentivorans_DS_1_uid58739          | CAS-II                                                 | 2-1-9                                                                                                 |
| 304321090      | Parvularcula_bermudensis_HTCC2503_uid51641          | CAS-I-C                                                | 2-1-4-x-8c-5-3 + 3HD                                                                                  |
| 386834577      | Pasteurella_multocida_3480_uid161955                | CAS-I-F                                                | 3f-1-6f-7f-5f-8f                                                                                      |
| 378774028      | Pasteurella_multocida_36950_uid86887                | CAS-I-F                                                | 8f-5f-7f-6f-1-3f                                                                                      |

Table S1 | Continued

| Cas1 GI number | Organism                                                              | Automatically assigned CRISPR-Cas system (CAS) subtype | CRISPR-Cas-related gene neighbours (1, 2, 3, 4, 5, 6, 7, 8, 9 and 10 are respective <i>cas</i> genes) |
|----------------|-----------------------------------------------------------------------|--------------------------------------------------------|-------------------------------------------------------------------------------------------------------|
| 383309947      | <i>Pasteurella_multocida</i> _HN06_uid156881                          | CAS-I-F                                                | 8f-5f-7f-6f-1-3f                                                                                      |
| 15602176       | <i>Pasteurella_multocida</i> _Pm70_uid57627                           | CAS-I-F                                                | 8f-5f-7f-6f-x-x-1-3f                                                                                  |
| 15602991       | <i>Pasteurella_multocida</i> _Pm70_uid57627                           | CAS-II                                                 | 2-1-9                                                                                                 |
| 50122600       | <i>Pectobacterium_atrosepticum</i> _SCRI1043_uid57957                 | CAS-I-F                                                | 1-3f-8f-5f-7f-6f                                                                                      |
| 403056816      | <i>Pectobacterium_carotovorum</i> _PCC21_uid174335                    | CAS-I-E                                                | 3 + 3HD-x-x-8e-cse2SS-7-5-6e-1-2                                                                      |
| 403059938      | <i>Pectobacterium_carotovorum</i> _PCC21_uid174335                    | CAS-I-F                                                | 1-3f-8f-5f-7f-6f                                                                                      |
| 261819747      | <i>Pectobacterium_wasabiae</i> _WPP163_uid41297                       | CAS-I-E                                                | 3 + 3HD-8e-cse2SS-7-5-6e-1-2                                                                          |
| 261822895      | <i>Pectobacterium_wasabiae</i> _WPP163_uid41297                       | CAS-I-F                                                | 6f-7f-5f-8f-3f-1                                                                                      |
| 404492576      | <i>Pelobacter_carbinolicus</i> _DSM_2380_uid58241                     | CAS-I-E                                                | 3-8e-cse2SS-7-5-6e-x-x-1-2                                                                            |
| 118580752      | <i>Pelobacter_propionicus</i> _DSM_2379_uid58255                      | CAS-I-E                                                | 2-1-6e-5-7-cse2SS-8e-3 + 3HD                                                                          |
| 194336722      | <i>Pelodictyon_phaeoclathratiforme</i> _BU_1_uid58173                 | CAS-I-C                                                | 3HD-3-5-8c-x-4-1-2                                                                                    |
| 194337466      | <i>Pelodictyon_phaeoclathratiforme</i> _BU_1_uid58173                 | CAS-III-A                                              | 6-csx1-csm5g7-csm4g5-csm3g7-csm2SS-10-x-csx15-2-1                                                     |
| 147678249      | <i>Pelotomaculum_thermopropionicum</i> _SI_uid58877                   | CAS-I                                                  | 2-1-4-3 + 3HD-5-x-x-x-6-6-cmr6g7-cmr5SS                                                               |
| 147678325      | <i>Pelotomaculum_thermopropionicum</i> _SI_uid58877                   | CAS-I-C                                                | 2-1 + 4-7-8c-5-3 + 3HD                                                                                |
| 225850878      | <i>Persephonella_marina</i> _EX_H1_uid58119                           | CAS-I-B                                                | 6-8a1-7-x-5-3-x-4-x-x-1-2                                                                             |
| 160903306      | <i>Petrotoga_mobilis</i> _SJ95_uid58747                               | CAS-I-B                                                | 2-1-4-3 + 3HD-5-x-x-8-6                                                                               |
| 47104059       | <i>Photobacterium_profundum</i> _SS9_uid62923                         | CAS-I-E                                                | 2-1-8e-5-7-cse2SS-6e-3 + 3HD                                                                          |
| 54303647       | <i>Photobacterium_profundum</i> _SS9_uid62923                         | CAS-I-F                                                | 6f-x-x-3 + 3f-1                                                                                       |
| 253990199      | <i>Photorhabdus_asymbiotica</i> _uid59243                             | CAS-I-F                                                | 6f-7f-5f-8f-1                                                                                         |
| 383765764      | <i>Phycisphaera_mikurensis</i> _NBRC_102666_uid157331                 | CAS-I-C                                                | 2-1-4-7-8c-5-3 + 3HD                                                                                  |
| 48477075       | <i>Picrophilus_torridus</i> _DSM_9790_uid58041                        | CAS-I-D                                                | 2-1-4-3-csc1g5-csc2g7-10d-6                                                                           |
| 48477121       | <i>Picrophilus_torridus</i> _DSM_9790_uid58041                        | CAS-III-A                                              | 2-1-csm5g7-csm4g5-csm3g7-10-6-x-csx1-csx1-csx1                                                        |
| 283778924      | <i>Pirellula_staleyii</i> _DSM_6068_uid43209                          | CAS-III-A                                              | 1 + RT-2-x-10-csm3g7-csm3g7                                                                           |
| 325110400      | <i>Planctomyces_brasiliensis</i> _DSM_5305_uid60583                   | CAS-I-C                                                | 2-1-x-4-7-8c-5-3 + 3HD                                                                                |
| 325110641      | <i>Planctomyces_brasiliensis</i> _DSM_5305_uid60583                   | CAS-I-C                                                | 2-1-x-4-7-8c-5-3 + 3HD                                                                                |
| 296121696      | <i>Planctomyces_limnophilus</i> _DSM_3776_uid48643                    | Unknown                                                | 2-1 + 4                                                                                               |
| 428202534      | <i>Pleurocapsa_PCC_7327</i> _uid183006                                | CAS-III-B                                              | csm6-cmr1g7 + cmr6g7-x-cmr4g7-cmr3g5-x-10-x-x-1-2                                                     |
| 428203734      | <i>Pleurocapsa_PCC_7327</i> _uid183006                                | CAS-I-D                                                | csc2g7-csc1g5-3-6-4-1-2                                                                               |
| 328544463      | <i>Polymorphum_gilvum</i> _SL003B_26A1_uid65447                       | CAS-I-E                                                | 3 + 3HD-8e-cse2SS-7-5-6e-1-2                                                                          |
| 332300108      | <i>Porphyromonas_asaccharolytica</i> _DSM_20707_uid66603              | CAS-I-C                                                | 3-5-8c-7-4-1-2                                                                                        |
| 188995823      | <i>Porphyromonas_gingivalis</i> _ATCC_33277_uid58879                  | CAS-I-B                                                | 2-1-4-7-x-3 + 3HD-x-6                                                                                 |
| 334146064      | <i>Porphyromonas_gingivalis</i> _TDC60_uid67407                       | CAS-III-B                                              | 2-1 + x-cmr6g7-x-cmr4g7-cmr3g5-10                                                                     |
| 334146098      | <i>Porphyromonas_gingivalis</i> _TDC60_uid67407                       | CAS-I                                                  | 2-1-4-3 + 3HD-7-8c-5-6                                                                                |
| 34541577       | <i>Porphyromonas_gingivalis</i> _W83_uid57641                         | CAS-III-B                                              | 2-1 + RT-cmr6g7-x-cmr4g7-cmr3g5-10                                                                    |
| 34541603       | <i>Porphyromonas_gingivalis</i> _W83_uid57641                         | CAS-I                                                  | 2-1-4-3 + 3HD-7-8c-5-6                                                                                |
| 327314603      | <i>Prevotella_denticola</i> _F0289_uid65091                           | CAS-III                                                | 10-cmr6g7-5g10-csm3g7-x-csm3g7-csx1-csx1-1-Prim-2                                                     |
| 387132278      | <i>Prevotella_intermedia</i> _17_uid163151                            | CAS-II                                                 | 9-1-2                                                                                                 |
| 410867500      | <i>Propionibacterium_acidipropionici</i> _ATCC_4875_uid179069         | CAS-I-E                                                | 3-8e-7-5-6e-1-2                                                                                       |
| 386070350      | <i>Propionibacterium_acnes</i> _ATCC_11828_uid162177                  | CAS-I-E                                                | 3 + 3HD-8e-cse2SS-7-5-6e-1-2                                                                          |
| 297625585      | <i>Propionibacterium_freudenreichii_shermanii</i> _CIRM_BIA1_uid49535 | CAS-I-U                                                | 2-1 + 4-csb3-3-5b6-csb1                                                                               |
| 397669411      | <i>Propionibacterium_propionicum</i> _F0230a_uid170533                | CAS-I-U                                                | 2-1 + 4-x-csb1                                                                                        |
| 397671369      | <i>Propionibacterium_propionicum</i> _F0230a_uid170533                | CAS-I                                                  | 2-1 + 4-8x1-3 + 3HD                                                                                   |

Table S1 | Continued

| Cas1 GI number | Organism                                                 | Automatically assigned CRISPR-Cas system (CAS) subtype | CRISPR-Cas-related gene neighbours (1, 2, 3, 4, 5, 6, 7, 8, 9 and 10 are respective <i>cas</i> genes) |
|----------------|----------------------------------------------------------|--------------------------------------------------------|-------------------------------------------------------------------------------------------------------|
| 194334221      | <i>Prosthecochloris_aestuarii</i> _DSM_271_uid58151      | CAS-I-E                                                | 2-1-5-7-6e-cse2SS-8e-3 + 3HD                                                                          |
| 386744974      | <i>Providencia_stuartii</i> _MRSN_2154_uid162193         | CAS-I-F                                                | 1-3f-8f-5f-7f-6f                                                                                      |
| 428217990      | <i>Pseudanabaena_PCC_7367</i> _uid183004                 | CAS-I-C                                                | 3 + 3HD-5-8c-7-4-1-2                                                                                  |
| 347538517      | <i>Pseudogulbenkiania_NH8B</i> _uid73423                 | CAS-I-E                                                | 3 + 3HD-x-8e-cse2SS-7-5-6e-1-2                                                                        |
| 392984024      | <i>Pseudomonas_aeruginosa_DK2</i> _uid168996             | CAS-I-F                                                | 6f-7f-5f-8f-3f-1                                                                                      |
| 386058681      | <i>Pseudomonas_aeruginosa_M18</i> _uid162089             | CAS-I-F                                                | 6f-7f-5f-8f-3f-1                                                                                      |
| 116050364      | <i>Pseudomonas_aeruginosa_UCBPP_PA14</i> _uid57977       | CAS-I-F                                                | 6f-7f-5f-8f-3f-1                                                                                      |
| 146308770      | <i>Pseudomonas_mendocina_ympp</i> _uid58723              | CAS-I-E                                                | 2-1-6e-5-7-cse2SS-8e-x-x-3 + 3HD                                                                      |
| 146284062      | <i>Pseudomonas_stutzeri_A1501</i> _uid58641              | CAS-I-C                                                | 3-5-8c-7-4-1-2                                                                                        |
| 357418717      | <i>Pseudoxanthomonas_spadix_BD_a59</i> _uid75113         | CAS-I-C                                                | 3 + 3HD-5-8c-7-4-1-2                                                                                  |
| 408489715      | <i>Psychroflexus_torquis_ATCC_700755</i> _uid54205       | CAS-II                                                 | 9-x-1-2                                                                                               |
| 119945309      | <i>Psychromonas_ingrahamii_37</i> _uid58521              | CAS-I-E                                                | 3 + 3HD-6e-cse2SS-7-5-8e-1-2                                                                          |
| 374326393      | <i>Pyrobaculum_1860</i> _uid82379                        | CAS-I                                                  | 4-1-2-4                                                                                               |
| 374326449      | <i>Pyrobaculum_1860</i> _uid82379                        | CAS-I-A                                                | 4-2-1-4-R-x-7-5-x-3                                                                                   |
| 18311699       | <i>Pyrobaculum_aerophilum_IM2</i> _uid57727              | CAS-I-A                                                | 3HD-3-x-x-x-6-csa3-x-4-2-1-4                                                                          |
| 18311772       | <i>Pyrobaculum_aerophilum_IM2</i> _uid57727              | CAS-I-A                                                | 6-4-2-1-4-csa3-x-8a2-3HD-3-5-7-csa5SS-6                                                               |
| 145591351      | <i>Pyrobaculum_arsenaticum_DSM_13514</i> _uid58409       | CAS-III-B                                              | cmr6g7-cmr1g7-cmr5SS-cmr4g7-10-cmr3g5-csx1-4-2-1-4-R-x-7-5-x-3-3HD-x-6                                |
| 126459887      | <i>Pyrobaculum_calidifontis_JCM_11548</i> _uid58787      | CAS-III-B                                              | 3HD-3-x-5-7-x-R-4-1-2-4-6-x-csx1-csm6-x-cmr3g5-10-cmr4g7                                              |
| 171185047      | <i>Pyrobaculum_neutrophilum_V24Sta</i> _uid58421         | CAS-I                                                  | csx1-x-x-x-4-2-1-4                                                                                    |
| 171185597      | <i>Pyrobaculum_neutrophilum_V24Sta</i> _uid58421         | CAS-I                                                  | 8a2-x-3-5-7-x-R-4-1-2-4-x-csm6-x-x-x-csm3g7-csm4g5                                                    |
| 379004063      | <i>Pyrobaculum_oguniense_TE7</i> _uid84411               | Unknown                                                | 4-1-2-x-x-x-6                                                                                         |
| 379004113      | <i>Pyrobaculum_oguniense_TE7</i> _uid84411               | CAS-III-B                                              | 8a2-x-3-5-7-x-R-4-1-2-4-csx1-cmr3g5-10-cmr4g7-cmr5SS-cmr1g7-cmr6g7                                    |
| 332159453      | <i>Pyrococcus_NA2</i> _uid66551                          | CAS-I-A                                                | 2-1-4-x-8a2-x-3-5-7-x-R                                                                               |
| 389851559      | <i>Pyrococcus_ST04</i> _uid167261                        | CAS-III-A                                              | csm5g7-csm4g5-csm3g7-csm2SS-10-6-x-3-4-2-1                                                            |
| 397651620      | <i>Pyrococcus_furiosus_COM1</i> _uid169620               | CAS-III-B                                              | 2-1-4-3-5-7-8a1-cmr6g7-cmr5SS-cmr4g7-csx1-cmr3g5                                                      |
| 18977490       | <i>Pyrococcus_furiosus_DSM_3638</i> _uid57873            | CAS-III-B                                              | 2-1-4-3-5-7-8b-cmr6g7-cmr5SS-cmr4g7-csm6-cmr3g5                                                       |
| 14590110       | <i>Pyrococcus_horikoshii_OT3</i> _uid57753               | CAS-III-A                                              | 10-csm2SS-csm3g7-csm4g5-csm5g7-csm6-8b-7-5-x-1-2-4-3-csx1                                             |
| 14591064       | <i>Pyrococcus_horikoshii_OT3</i> _uid57753               | CAS-I-A                                                | 2-1-4-4-3-5-7-8a1-6                                                                                   |
| 337284443      | <i>Pyrococcus_yayanosii_CH1</i> _uid68281                | CAS-I-A                                                | 6-8a1-7-5-3 + 3HD-4-1-csa5SS-7-5-8a2-3-3HD-R-6-2                                                      |
| 337284924      | <i>Pyrococcus_yayanosii_CH1</i> _uid68281                | CAS-III-A                                              | csm3g7-csm4g5-csm5g7-csx1-x-7-5-x-x-1-2-4-3                                                           |
| 347523053      | <i>Pyrolobus_fumariorum_1A</i> _uid73415                 | CAS-I-A                                                | 4-x-x-x-x-2-1-4-R-x-x-3HD-3-8a2-5-7-csa5SS                                                            |
| 383189738      | <i>Rahnella_aquatilis_CIP_78_65</i> _ATCC_33071_uid86855 | CAS-I-F                                                | 1-3f-8f-5f-7f-6f                                                                                      |
| 300703390      | <i>Ralstonia_solanacearum_CFBP2957</i> _uid50545         | CAS-I-E                                                | 3 + 3HD-8e-cse2SS-7-5-6e-1-2                                                                          |
| 386332757      | <i>Ralstonia_solanacearum_Po82</i> _uid162133            | CAS-I-E                                                | 3 + 3HD-8e-cse2SS-7-5-6e-1-2                                                                          |

Table S1 | Continued

| Cas1 GI number | Organism                                     | Automatically assigned CRISPR-Cas system (CAS) subtype | CRISPR-Cas-related gene neighbours (1, 2, 3, 4, 5, 6, 7, 8, 9 and 10 are respective <i>cas</i> genes) |
|----------------|----------------------------------------------|--------------------------------------------------------|-------------------------------------------------------------------------------------------------------|
| 337281134      | Ramlibacter_tataouinensis_TTB310_uid68279    | CAS-I-C                                                | 3-5-8c-7-4-1-2                                                                                        |
| 294676823      | Rhodobacter_capsulatus_SB_1003_uid47509      | CAS-III-A                                              | RT-x-x-x-x-x-10-csm3g7-csm3g7-2-1 + RT-RT-6                                                           |
| 294676849      | Rhodobacter_capsulatus_SB_1003_uid47509      | CAS-I-C                                                | 3 + 3HD-5-8c-7-4-1-2                                                                                  |
| 221640061      | Rhodobacter_sphaeroides_KD131_uid59277       | CAS-I-C                                                | 3 + 3HD-5-8c-7-4-1-2                                                                                  |
| 89885834       | Rhodoferax_ferrireducens_T118_uid58353       | CAS-I-E                                                | 1-6e-csf3g5-csf2g7-x-csf1g8-DinG                                                                      |
| 89902666       | Rhodoferax_ferrireducens_T118_uid58353       | CAS-I-C                                                | 3-5-8c-7-x-4-1-2                                                                                      |
| 312113992      | Rhodomicrobium_vannielii_ATCC_17100_uid43247 | CAS-I-C                                                | 3 + 3HD-5-8c-7-4-1-2                                                                                  |
| 312114617      | Rhodomicrobium_vannielii_ATCC_17100_uid43247 | CAS-III-A                                              | RT-2-1-csm3g7-csx19-csm3g7-csm3g7-10-x-csm6-csx1-x-csx16                                              |
| 90425960       | Rhodopseudomonas_palustris_BisB18_uid58443   | CAS-II                                                 | 2-1-9                                                                                                 |
| 91975510       | Rhodopseudomonas_palustris_BisB5_uid58441    | CAS-II                                                 | 9-1                                                                                                   |
| 316934446      | Rhodopseudomonas_palustris_DX_1_uid43327     | CAS-I-C                                                | 3 + 3HD-x-8c-7-4-1-2                                                                                  |
| 209966592      | Rhodospirillum_centenum_SW_uid58805          | CAS-I-E                                                | 2-1-6e-5-7-cse2SS-8e-3                                                                                |
| 209966743      | Rhodospirillum_centenum_SW_uid58805          | CAS-III-B                                              | 10-cmr3g5-cmr4g7-cmr5SS-cmr1g7 + cmr6g7-csx1-1-2                                                      |
| 384261706      | Rhodospirillum_photometricum_uid159003       | CAS-I-E                                                | 6e-5-7-cse2SS-8e-3 + 3HD-2-1                                                                          |
| 384262419      | Rhodospirillum_photometricum_uid159003       | CAS-I-E                                                | 2-1-6e-5-7-8e-3 + 3HD                                                                                 |
| 83591509       | Rhodospirillum_rubrum_ATCC_11170_uid57655    | CAS-I-E                                                | 2-1-6e-5-7-cse2SS-8e-3-x-x-2-1 + 4-csb2-x-x-csm3g7-csm3g7-csm3g7-10                                   |
| 83591519       | Rhodospirillum_rubrum_ATCC_11170_uid57655    | CAS-I-E                                                | 2-1-6e-5-7-cse2SS-8e-3-x-x-2-1 + 4-csb2-x-x-csm3g7-csm3g7-csm3g7-10                                   |
| 83591687       | Rhodospirillum_rubrum_ATCC_11170_uid57655    | CAS-I-E                                                | 3 + 3HD-8e-x-cse2SS-7-5-6e-1-2                                                                        |
| 83592169       | Rhodospirillum_rubrum_ATCC_11170_uid57655    | CAS-I-C                                                | 3 + 3HD-5-8c-7-4-1-2                                                                                  |
| 83592490       | Rhodospirillum_rubrum_ATCC_11170_uid57655    | CAS-III-A                                              | csm3g7-csm3g7-csm3g7-10-6-2-1                                                                         |
| 386348188      | Rhodospirillum_rubrum_F11_uid162149          | CAS-I-E                                                | 2-1-6e-5-7-cse2SS-8e-3 + 3HD-x-x-2-1 + 4-x-x-csm3g7 + x-csm3g7-csm3g7                                 |
| 386348198      | Rhodospirillum_rubrum_F11_uid162149          | CAS-I-E                                                | 2-1-6e-5-7-cse2SS-8e-3 + 3HD-x-x-2-1 + 4-x-x-csm3g7 + x-csm3g7-csm3g7                                 |
| 386348372      | Rhodospirillum_rubrum_F11_uid162149          | CAS-I-E                                                | 3 + 3HD-x-8e-x-cse2SS-7-5-6e-1-2                                                                      |
| 386348878      | Rhodospirillum_rubrum_F11_uid162149          | CAS-I-C                                                | 3 + 3HD-5-8c-7-4-1-2                                                                                  |
| 386349209      | Rhodospirillum_rubrum_F11_uid162149          | CAS-III-A                                              | csm3g7-cmr3g5 + csm3g7-10-6-2-1                                                                       |
| 268316057      | Rhodothermus_marinus_DSM_4252_uid41729       | CAS-I-E                                                | 3 + 3HD-8e-cse2SS-7-5-6e-1-2                                                                          |
| 268317185      | Rhodothermus_marinus_DSM_4252_uid41729       | CAS-III-A                                              | 2-1-x-csx1-csm5g7-csm4g5-csm3g7-csm2SS-10-4-3-5                                                       |
| 268318378      | Rhodothermus_marinus_DSM_4252_uid41729       | CAS-III-U                                              | csx1-csx20-x-x-csx1-csx1-6-x-2-1 + 4                                                                  |
| 268318441      | Rhodothermus_marinus_DSM_4252_uid41729       | Unknown                                                | 2-1 + 4                                                                                               |
| 345303027      | Rhodothermus_marinus_SG0_5JP17_172_uid72767  | CAS-III-A                                              | 5g10-x-csm3g7-csm3g7-x-csm3g7-x-csx1-csx1-x-1-2-10-csm2SS-csm3g7-csm4g5-csm5g7 + x-csx1               |
| 345301858      | Rhodothermus_marinus_SG0_5JP17_172_uid72767  | Unknown                                                | csx1-x-x-x-csx1-csx1-6-x-2-1 + 4-x-x-x-x-x-x-csx1                                                     |

Table S1 | Continued

| Cas1 GI number | Organism                                                         | Automatically assigned CRISPR-Cas system (CAS) subtype | CRISPR-Cas-related gene neighbours (1, 2, 3, 4, 5, 6, 7, 8, 9 and 10 are respective cas genes) |
|----------------|------------------------------------------------------------------|--------------------------------------------------------|------------------------------------------------------------------------------------------------|
| 383485593      | Riemerella_anatipestifer_ATCC_11845__DSM_15868_uid159857         | CAS-II                                                 | 2-1-9                                                                                          |
| 313206287      | Riemerella_anatipestifer_ATCC_11845__DSM_15868_uid60727          | CAS-II                                                 | 2-1                                                                                            |
| 407451860      | Riemerella_anatipestifer_RA_CH_1_uid175469                       | CAS-II                                                 | 9-1-2                                                                                          |
| 442314524      | Riemerella_anatipestifer_RA_CH_2_uid186548                       | CAS-II                                                 | 9-1-2                                                                                          |
| 386321728      | Riemerella_anatipestifer_RA_GD_uid162013                         | CAS-II                                                 | 9-1-2                                                                                          |
| 427738347      | Rivularia_PCC_7116_uid182929                                     | Unknown                                                | 1-2                                                                                            |
| 347532818      | Roseburia_hominis_A2_183_uid73419                                | CAS-I-C                                                | 2-1-4-7-8c-5-3 + 3HD                                                                           |
| 148654810      | Roseiflexus_RS_1_uid58523                                        | CAS-I-E                                                | 1-6e-5-7-cse2SS-8e-3 + 3HD                                                                     |
| 148656004      | Roseiflexus_RS_1_uid58523                                        | CAS-III-U                                              | csm3g7-10-csx1-csx1-csx3-8b-7-5-3-6-1-2-4                                                      |
| 148657121      | Roseiflexus_RS_1_uid58523                                        | CAS-III-U                                              | 2-x-1-RT-x-x-x-csx15-csx1-x-csx1                                                               |
| 148658413      | Roseiflexus_RS_1_uid58523                                        | CAS-I-C                                                | 2-1-4-7-8c-5-3 + 3HD                                                                           |
| 156741961      | Roseiflexus_castenholzii_DSM_13941_uid58287                      | CAS-III-A                                              | 10-csm2SS-csm3g7-csm4g5-csm5g7-csx1-6-1-2                                                      |
| 156742636      | Roseiflexus_castenholzii_DSM_13941_uid58287                      | Unknown                                                | 2-x-1-x-x-x-csx15-csx1-x-csx1                                                                  |
| 156743243      | Roseiflexus_castenholzii_DSM_13941_uid58287                      | CAS-I                                                  | 5g10 + csm3g7-10-csx1-csx1 + x-csx3 + x-8a1-7-5-3-6-1-2-4                                      |
| 283458258      | Rothia_mucilaginoso_uid43093                                     | CAS-I-U                                                | csb3-3-5b6-x-csb1-2-1 + 4                                                                      |
| 383756542      | Rubrivivax_gelatinosus_IL144_uid158163                           | CAS-I-E                                                | 2-1-6e-5-7-cse2SS-8e-3 + 3HD                                                                   |
| 108803109      | Rubrobacter_xylanophilus_DSM_9941_uid58057                       | CAS-III-B                                              | 2-1-csm6-cmr6g7-cmr5SS-cmr4g7-cmr3g5-10-cmr1g7-csx1-4-3 + 3HD                                  |
| 317055826      | Ruminococcus_albus_7_uid51721                                    | CAS-I-C                                                | 3 + 3HD-5-8c-7-4-1-2                                                                           |
| 338214362      | Runella_slithiformis_DSM_19594_uid68317                          | CAS-I                                                  | 6-6-x-3 + 3HD-x-x-7-x-x-4-1-2                                                                  |
| 257055744      | Saccharomonospora_viridis_DSM_43017_uid59055                     | CAS-I-E                                                | 3 + 3HD-8e-cse2SS-7-5-6e-1-2                                                                   |
| 257055753      | Saccharomonospora_viridis_DSM_43017_uid59055                     | CAS-I-E                                                | 2-1-6e-5-7-cse2SS-8e-3 + 3HD                                                                   |
| 134101617      | Saccharopolyspora_erythraea_NRRL_2338_uid62947                   | CAS-III-A                                              | 1 + 4-2-x-x-x-csm3g7-cmr3g5-csm3g7-10                                                          |
| 433603791      | Saccharothrix_espanaensis_DSM_44229_uid184826                    | CAS-I-E                                                | 2-1-6e-5-7-cse2SS-8e-3 + 3HD                                                                   |
| 159037600      | Salinispora_arenicola_CNS_205_uid58659                           | CAS-I-E                                                | 3 + 3HD-8e-cse2SS-7-5-6e-1-2                                                                   |
| 159038158      | Salinispora_arenicola_CNS_205_uid58659                           | CAS-I-E                                                | 3 + 3HD-8e-cse2SS-7-5-6e-1-2                                                                   |
| 145593555      | Salinispora_tropica_CNB_440_uid58565                             | CAS-III-A                                              | 2-1-4-3 + 3HD-5-7-x-6-csm3g7-csm3g7-5g10 + csm3g7-10                                           |
| 340000487      | Salmonella_bongori_NCTC_12419_uid70155                           | CAS-I-E                                                | 2-1-6e-7-cse2SS-8e-3                                                                           |
| 197248534      | Salmonella_enterica_serovar_Agona_SL483_uid59431                 | CAS-I-E                                                | 2-1-6e-5-7-cse2SS-8e-3                                                                         |
| 62181440       | Salmonella_enterica_serovar_Choleraesuis_SC_B67_uid58017         | CAS-I-E                                                | 2-1-6e-5-7-cse2SS                                                                              |
| 198243044      | Salmonella_enterica_serovar_Dublin_CT_02021853_uid58917          | CAS-I-E                                                | 2-1-6e-5-7-cse2SS-8e                                                                           |
| 207858198      | Salmonella_enterica_serovar_Enteritidis_P125109_uid59247         | CAS-I-E                                                | 2-1-6e-5-7-cse2SS-8e-3                                                                         |
| 205353879      | Salmonella_enterica_serovar_Gallinarum_287_91_uid59249           | CAS-I-E                                                | 2-1-6e-5-7-cse2SS-8e                                                                           |
| 378956558      | Salmonella_enterica_serovar_Gallinarum_pullorum_RKS5078_uid87035 | CAS-I-E                                                | 1-6e-5-7-cse2SS-8e-3                                                                           |
| 386592622      | Salmonella_enterica_serovar_Heidelberg_B182_uid162195            | CAS-I-E                                                | 2-1-6e-5-7-cse2SS-8e-3                                                                         |
| 194448225      | Salmonella_enterica_serovar_Heidelberg_SL476_uid58973            | CAS-I-E                                                | 2-1-6e-5-7-cse2SS-8e-3                                                                         |
| 194444085      | Salmonella_enterica_serovar_Newport_SL254_uid58831               | CAS-I-E                                                | 2-1-6e-5-7-cse2SS-8e                                                                           |
| 197363813      | Salmonella_enterica_serovar_Paratyphi_A_AKU_12601_uid59269       | CAS-I-E                                                | 2-1-6e-5-7-cse2SS                                                                              |
| 56414885       | Salmonella_enterica_serovar_Paratyphi_A_ATCC_9150_uid58201       | CAS-I-E                                                | 2-1-6e-5-7-cse2SS                                                                              |
| 224584717      | Salmonella_enterica_serovar_Paratyphi_C_RKS4594_uid59063         | CAS-I-E                                                | 2-1-6e-5-7-cse2SS-8e-3                                                                         |
| 194734989      | Salmonella_enterica_serovar_Schwarzengrund_CVM19633_uid58915     | CAS-I-E                                                | 2-1-6e-5-7-cse2SS-8e                                                                           |
| 16761710       | Salmonella_enterica_serovar_Typhi_CT18_uid57793                  | CAS-I-E                                                | 2-1-6e-5-7-cse2SS-8e-3                                                                         |



Table S1 | Continued

| Cas1 GI number | Organism                                                        | Automatically assigned CRISPR-Cas system (CAS) subtype | CRISPR-Cas-related gene neighbours (1, 2, 3, 4, 5, 6, 7, 8, 9 and 10 are respective <i>cas</i> genes) |
|----------------|-----------------------------------------------------------------|--------------------------------------------------------|-------------------------------------------------------------------------------------------------------|
| 378961003      | <i>Salmonella_enterica_serovar_Typhi_P_stx_12_uid87001</i>      | CAS-I-E                                                | 2-1-6e-5-7-cse2SS-8e-3                                                                                |
| 29143194       | <i>Salmonella_enterica_serovar_Typhi_Ty2_uid57973</i>           | CAS-I-E                                                | 2-1-6e-5-7-cse2SS-8e-3                                                                                |
| 378451691      | <i>Salmonella_enterica_serovar_Typhimurium_140285_uid86059</i>  | CAS-I-E                                                | 2-1-6e-5-7-cse2SS-8e-3                                                                                |
| 383497609      | <i>Salmonella_enterica_serovar_Typhimurium_798_uid158047</i>    | CAS-I-E                                                | 2-1-6e-5-7-cse2SS-8e-3                                                                                |
| 16766244       | <i>Salmonella_enterica_serovar_Typhimurium_LT2_uid57799</i>     | CAS-I-E                                                | 2-1-6e-5-7-cse2SS-8e-3                                                                                |
| 378700849      | <i>Salmonella_enterica_serovar_Typhimurium_SL1344_uid86645</i>  | CAS-I-E                                                | 2-1-6e-5-7-cse2SS-8e-3                                                                                |
| 379702192      | <i>Salmonella_enterica_serovar_Typhimurium_ST4_74_uid84393</i>  | CAS-I-E                                                | 2-1-6e-5-7-cse2SS-8e-3                                                                                |
| 378985528      | <i>Salmonella_enterica_serovar_Typhimurium_T000240_uid84397</i> | CAS-I-E                                                | 2-1-6e-5-7-cse2SS-8e-3                                                                                |
| 378990262      | <i>Salmonella_enterica_serovar_Typhimurium_UK_1_uid87049</i>    | CAS-I-E                                                | 2-1-6e-5-7-cse2SS-8e-3                                                                                |
| 378446294      | <i>Salmonella_enterica_serovar_Typhimurium_uid86061</i>         | CAS-I-E                                                | 2-1-6e-5-7-cse2SS-8e-3                                                                                |
| 379728404      | <i>Saprosira_grandis_Lewin_uid89375</i>                         | Unknown                                                | 2-x-1                                                                                                 |
| 383753766      | <i>Selenomonas_ruminantium_lactilytica_TAM6421_uid157247</i>    | CAS-I-F                                                | 1-3f-8f-5f-7f-6f                                                                                      |
| 330839805      | <i>Selenomonas_sputigena_ATCC_35185_uid55329</i>                | CAS-I-C                                                | 2-1-4-7-8c-5-3 + 3HD                                                                                  |
| 440229170      | <i>Serratia_marcescens_FGI94_uid185180</i>                      | CAS-I-F                                                | 1-3f-8f-5f-7f-6f                                                                                      |
| 120598999      | <i>Shewanella_W3_18_1_uid58341</i>                              | CAS-I-F                                                | DinG-6f-7f-5f-8f-3f-1                                                                                 |
| 153001750      | <i>Shewanella_baltica_OS185_uid58743</i>                        | CAS-I-F                                                | 6f-7f-5f-8f-3f-1                                                                                      |
| 160876483      | <i>Shewanella_baltica_OS195_uid58261</i>                        | CAS-I-F                                                | 6f-7f-5f-8f-3f-1                                                                                      |
| 378709684      | <i>Shewanella_baltica_OS678_uid50553</i>                        | CAS-I-F                                                | 6f-7f-5f-8f-3f-1                                                                                      |
| 386313929      | <i>Shewanella_putrefaciens_200_uid161927</i>                    | CAS-I-F                                                | DinG-6f-x-x-3 + 3f-1                                                                                  |
| 146292917      | <i>Shewanella_putrefaciens_CN_32_uid58267</i>                   | CAS-I-F                                                | 1-3 + 3f-x-x-6f-DinG                                                                                  |
| 82545172       | <i>Shigella_boydii_Sb227_uid58215</i>                           | CAS-I-E                                                | 3-8e-cse2SS-7-5-6e-1-2                                                                                |
| 430741373      | <i>Singulisphaera_acidiphila_DSM_18658_uid81777</i>             | CAS-I-C                                                | 2-1 + 4-5-7-8c + 8c2-3 + 3HD-6                                                                        |
| 162457462      | <i>Sorangium_cellulosum_So_ce_56_uid61629</i>                   | CAS-I-C                                                | 6-3-8c-7-5-1-2                                                                                        |
| 269929332      | <i>Sphaerobacter_thermophilus_DSM_20745_uid41997</i>            | CAS-I-E                                                | 2-1-6e-5-7-cse2SS-8e-3 + 3HD                                                                          |
| 374317550      | <i>Sphaerochaeta_pleomorpha_Grapes_uid82365</i>                 | CAS-I-C                                                | 3-5-8c-7-4-1-2                                                                                        |
| 347528128      | <i>Sphingobium_SYK_6_uid73353</i>                               | CAS-I-C                                                | 3 + 3HD-5-8c-7-4-1-2                                                                                  |
| 325972002      | <i>Spirochaeta_Buddy_uid63633</i>                               | CAS-II                                                 | 2-1-9                                                                                                 |
| 383789641      | <i>Spirochaeta_africana_DSM_8902_uid81779</i>                   | CAS-I-F                                                | 1-3f-8f-5f-7f-6f                                                                                      |
| 339500527      | <i>Spirochaeta_caldaria_DSM_7334_uid68753</i>                   | CAS-I-C                                                | 2-1-4-7-8c-5-3 + 3HD                                                                                  |
| 330837093      | <i>Spirochaeta_coccoides_DSM_17374_uid66331</i>                 | CAS-I-E                                                | 3-8e-cse2SS-6e-7-5-1-2                                                                                |
| 330837112      | <i>Spirochaeta_coccoides_DSM_17374_uid66331</i>                 | CAS-I-F                                                | 6f-7f-5f-8f-3f-1                                                                                      |
| 302337595      | <i>Spirochaeta_smaragdinae_DSM_11293_uid51369</i>               | CAS-I-C                                                | 3 + 3HD-5-8c-7-4-1-2                                                                                  |
| 307718095      | <i>Spirochaeta_thermophila_DSM_6192_uid53037</i>                | CAS-I-C                                                | 3-5-x-7-4-1-2                                                                                         |
| 386346101      | <i>Spirochaeta_thermophila_DSM_6578_uid162041</i>               | CAS-I-C                                                | 1-2                                                                                                   |
| 386346444      | <i>Spirochaeta_thermophila_DSM_6578_uid162041</i>               | CAS-I-D                                                | 3 + x-3HD-x-x-csc2g7-x-4-2-1-x-x-x-6                                                                  |
| 284040851      | <i>Spirosoma_linguale_DSM_74_uid43413</i>                       | CAS-I-B                                                | 8-7-5-3-6-1-2-4                                                                                       |
| 434397028      | <i>Stanieria_cyanosphaera_PCC_7437_uid183115</i>                | CAS-III-B                                              | 1-x-cmr1g7 + cmr6g7-x-cmr4g7-cmr3g5-2                                                                 |
| 434399186      | <i>Stanieria_cyanosphaera_PCC_7437_uid183115</i>                | CAS-I-C                                                | 2-1 + 4-5-7-8c + 8c2-3 + 3HD-6                                                                        |
| 434408292      | <i>Stanieria_cyanosphaera_PCC_7437_uid183115</i>                | CAS-I-D                                                | 2-1-4-6-csc1g5-csc2g7-10d-x-3                                                                         |
| 404477384      | <i>Staphylococcus_aureus_08BA02176_uid175257</i>                | CAS-III-A                                              | 1-2-10-csm2SS-csm3g7-csm4g5-csm5g7-csm6-6                                                             |
| 379794576      | <i>Staphylococcus_aureus_MSHR1132_uid89393</i>                  | CAS-III-A                                              | 1-2-10-csm2SS-csm3g7-csm4g5-csm5g7-csm6-6                                                             |
| 57865886       | <i>Staphylococcus_epidermidis_RP62A_uid57663</i>                | CAS-III-A                                              | 6-csm6-csm5g7-csm4g5-csm3g7-csm2SS-10-2-1                                                             |
| 289549397      | <i>Staphylococcus_lugdunensis_HKU09_01_uid46233</i>             | CAS-III-A                                              | 1-2-10-csm2SS-csm3g7-csm4g5-csm5g7-csm6-csm6-6                                                        |

Table S1 | Continued

| Cas1 GI number | Organism                                                            | Automatically assigned CRISPR-Cas system (CAS) subtype | CRISPR-Cas-related gene neighbours (1, 2, 3, 4, 5, 6, 7, 8, 9 and 10 are respective <i>cas</i> genes) |
|----------------|---------------------------------------------------------------------|--------------------------------------------------------|-------------------------------------------------------------------------------------------------------|
| 385783005      | <i>Staphylococcus lugdunensis</i> _N920143_uid162143                | CAS-III-A                                              | 1-2-10-csm25S-csm3g7-csm4g5-csm5g7-6                                                                  |
| 386318631      | <i>Staphylococcus pseudintermedius</i> _ED99_uid162109              | CAS-II                                                 | 9-1-2                                                                                                 |
| 126465226      | <i>Staphylothermus marinus</i> _F1_uid58719                         | CAS-I-A                                                | csm3g7-csm4g5-csm5g7-10-x-x-1-4-2-4-6-R-csa55S-7-5-csa8a2-3                                           |
| 269123825      | <i>Streptobacillus moniliformis</i> _DSM_12112_uid41863             | CAS-II                                                 | 2-1-9                                                                                                 |
| 22537058       | <i>Streptococcus agalactiae</i> _2603V_R_uid57943                   | CAS-II-A                                               | 9-1-2-csn2                                                                                            |
| 76786845       | <i>Streptococcus agalactiae</i> _A909_uid57935                      | CAS-II-A                                               | 9-1-2-csn2                                                                                            |
| 406709384      | <i>Streptococcus agalactiae</i> _GD201008_001_uid175780             | CAS-II-A                                               | 9-1-2-csn2                                                                                            |
| 25010966       | <i>Streptococcus agalactiae</i> _NEM316_uid61585                    | CAS-II-A                                               | 9-1-2-csn2                                                                                            |
| 410594451      | <i>Streptococcus agalactiae</i> _SA20_06_uid178722                  | CAS-II-A                                               | 9-1-2-csn2                                                                                            |
| 410494912      | <i>Streptococcus dysgalactiae equisimilis</i> _AC_2713_uid178644    | CAS-II-A                                               | csn2-2-1-9                                                                                            |
| 410495372      | <i>Streptococcus dysgalactiae equisimilis</i> _AC_2713_uid178644    | CAS-I-C                                                | 2-1-4-7-8c-5-3                                                                                        |
| 386317165      | <i>Streptococcus dysgalactiae equisimilis</i> _ATCC_12394_uid161979 | CAS-II-A                                               | csn2-2-1-9                                                                                            |
| 386317483      | <i>Streptococcus dysgalactiae equisimilis</i> _ATCC_12394_uid161979 | CAS-I-C                                                | 2-1-4-7-8c-5-3                                                                                        |
| 251782636      | <i>Streptococcus dysgalactiae equisimilis</i> _GG5_124_uid59103     | CAS-II-A                                               | csn2-2-1-9                                                                                            |
| 408401786      | <i>Streptococcus dysgalactiae equisimilis</i> _RE378_uid176684      | CAS-II-A                                               | csn2-2-1-9                                                                                            |
| 408402093      | <i>Streptococcus dysgalactiae equisimilis</i> _RE378_uid176684      | CAS-I-C                                                | 2-1-4-7-8c-5-3                                                                                        |
| 414563500      | <i>Streptococcus equi zooepidemicus</i> _ATCC_35246_uid162155       | CAS-I-C                                                | 3 + x-x-5-8c-7-4-1-2                                                                                  |
| 195977694      | <i>Streptococcus equi zooepidemicus</i> _MGCS10565_uid59263         | CAS-I-C                                                | 3-5-8c-7-4-1-2                                                                                        |
| 195978434      | <i>Streptococcus equi zooepidemicus</i> _MGCS10565_uid59263         | CAS-II-A                                               | csn2-2-1-9                                                                                            |
| 225869002      | <i>Streptococcus equi zooepidemicus</i> _uid59261                   | CAS-I-C                                                | 2-1-4-7-8c-5-3                                                                                        |
| 386338080      | <i>Streptococcus gallolyticus</i> _ATCC_43143_uid162103             | CAS-II                                                 | 2-1-9                                                                                                 |
| 386338090      | <i>Streptococcus gallolyticus</i> _ATCC_43143_uid162103             | CAS-II-A                                               | csn2-2-1-9                                                                                            |
| 325978668      | <i>Streptococcus gallolyticus</i> _ATCC_BAA_2069_uid63617           | CAS-II-A                                               | csn2-2-1-9                                                                                            |
| 288905631      | <i>Streptococcus gallolyticus</i> _UCN34_uid46061                   | CAS-II-A                                               | 2-1-9-x-x-x-csn2-2-1-9                                                                                |
| 288905638      | <i>Streptococcus gallolyticus</i> _UCN34_uid46061                   | CAS-II-A                                               | 2-1-9-x-x-x-csn2-2-1-9                                                                                |
| 157149930      | <i>Streptococcus gordonii</i> _Challis_substr_CH1_uid57667          | CAS-II                                                 | 2-1-9                                                                                                 |
| 379705579      | <i>Streptococcus infantarius</i> _CJ18_uid87033                     | CAS-II-A                                               | csn2-2-1-9                                                                                            |
| 374338349      | <i>Streptococcus macedonicus</i> _ACA_DC_198_uid81631               | CAS-II                                                 | 2-1-9                                                                                                 |
| 397650021      | <i>Streptococcus mutans</i> _GS_5_uid169223                         | CAS-II-A                                               | csn2-2-1-9                                                                                            |
| 397650106      | <i>Streptococcus mutans</i> _GS_5_uid169223                         | CAS-I-E                                                | 2 + x-1-6e-5-7-cse25S-3 + 3HD                                                                         |
| 387785565      | <i>Streptococcus mutans</i> _LJ23_uid162197                         | CAS-I-C                                                | 3-5-8c-7-4-1-2                                                                                        |
| 387785883      | <i>Streptococcus mutans</i> _LJ23_uid162197                         | CAS-II-A                                               | 9-1-2-csn2                                                                                            |
| 290580135      | <i>Streptococcus mutans</i> _NN2025_uid46353                        | CAS-I-E                                                | 3 + 3HD-8e-cse25S-7-5-6e-1-2                                                                          |
| 290580221      | <i>Streptococcus mutans</i> _NN2025_uid46353                        | CAS-II-A                                               | 9-1-2-csn2                                                                                            |
| 24379808       | <i>Streptococcus mutans</i> _UA159_uid57947                         | CAS-II-A                                               | csn2-2-1-9                                                                                            |
| 337281888      | <i>Streptococcus parasanguinis</i> _ATCC_15912_uid49313             | CAS-I-C                                                | 3-5-8c-7-4-1-2                                                                                        |
| 336064610      | <i>Streptococcus pasteurianus</i> _ATCC_43144_uid68019              | CAS-II                                                 | 2-1-9                                                                                                 |
| 410680444      | <i>Streptococcus pyogenes</i> _A20_uid178106                        | CAS-II-A                                               | 9-1-2-csn2                                                                                            |
| 410680951      | <i>Streptococcus pyogenes</i> _A20_uid178106                        | CAS-I-C                                                | 2-1-4-7-8c-5-3                                                                                        |
| 15675042       | <i>Streptococcus pyogenes</i> _M1_GAS_uid57845                      | CAS-II-A                                               | 9-1-2-csn2                                                                                            |
| 15675454       | <i>Streptococcus pyogenes</i> _M1_GAS_uid57845                      | CAS-I-C                                                | 2-1-4-7-8c-5-3                                                                                        |
| 94990396       | <i>Streptococcus pyogenes</i> _MGAS10270_uid58571                   | CAS-II-A                                               | 9-1-2-csn2                                                                                            |
| 94994318       | <i>Streptococcus pyogenes</i> _MGAS10750_uid58575                   | CAS-II-A                                               | 9-1-2-csn2                                                                                            |
| 94994789       | <i>Streptococcus pyogenes</i> _MGAS10750_uid58575                   | CAS-I-C                                                | 2-1-4-7-8c-5-x-3                                                                                      |
| 383479947      | <i>Streptococcus pyogenes</i> _MGAS15252_uid158037                  | CAS-II-A                                               | 9-1-2-csn2                                                                                            |
| 383493862      | <i>Streptococcus pyogenes</i> _MGAS1882_uid158061                   | CAS-II-A                                               | 9-1-2-csn2                                                                                            |
| 94992341       | <i>Streptococcus pyogenes</i> _MGAS2096_uid58573                    | CAS-II-A                                               | 9-1-2-csn2                                                                                            |

Table S1 | Continued

| Cas1 GI number | Organism                                                      | Automatically assigned CRISPR-Cas system (CAS) subtype | CRISPR-Cas-related gene neighbours (1, 2, 3, 4, 5, 6, 7, 8, 9 and 10 are respective <i>cas</i> genes) |
|----------------|---------------------------------------------------------------|--------------------------------------------------------|-------------------------------------------------------------------------------------------------------|
| 94992802       | <i>Streptococcus pyogenes</i> _MGAS2096_uid58573              | CAS-I-C                                                | 2-1-4-7-8c-5-3                                                                                        |
| 21910214       | <i>Streptococcus pyogenes</i> _MGAS315_uid57911               | CAS-II-A                                               | 9-1-2-csn2                                                                                            |
| 71910583       | <i>Streptococcus pyogenes</i> _MGAS5005_uid58337              | CAS-II-A                                               | 9-1-2-csn2                                                                                            |
| 71911099       | <i>Streptococcus pyogenes</i> _MGAS5005_uid58337              | CAS-I-C                                                | 2-1-4-7-8c-5-3                                                                                        |
| 71903414       | <i>Streptococcus pyogenes</i> _MGAS6180_uid58335              | CAS-II-A                                               | 9-1-2-csn2                                                                                            |
| 71903952       | <i>Streptococcus pyogenes</i> _MGAS6180_uid58335              | CAS-I-C                                                | 2-1-4-7-8c-5-3                                                                                        |
| 94988517       | <i>Streptococcus pyogenes</i> _MGAS9429_uid58569              | CAS-II-A                                               | 9-1-2-csn2                                                                                            |
| 94988910       | <i>Streptococcus pyogenes</i> _MGAS9429_uid58569              | CAS-I-C                                                | 2-1-4-7-8c-5-3                                                                                        |
| 209559357      | <i>Streptococcus pyogenes</i> _NZ131_uid59035                 | CAS-II-A                                               | 9-1-2-csn2                                                                                            |
| 209559719      | <i>Streptococcus pyogenes</i> _NZ131_uid59035                 | CAS-I-C                                                | 2-1-4-7-8c-5-3                                                                                        |
| 28896087       | <i>Streptococcus pyogenes</i> _SSI_1_uid57895                 | CAS-II-A                                               | csn2-2-1-9                                                                                            |
| 387761326      | <i>Streptococcus salivarius</i> _57_I_uid162151               | CAS-I-E                                                | 2 + x-1-6e-5-7-cse2SS-8e-3 + 3HD                                                                      |
| 340398858      | <i>Streptococcus salivarius</i> _CCHSS3_uid70481              | CAS-I-E                                                | 2 + x-1-6e-5-7-cse2SS-8e-3 + 3HD                                                                      |
| 387783793      | <i>Streptococcus salivarius</i> _JIM8777_uid162145            | CAS-II                                                 | 9-1-2                                                                                                 |
| 386584495      | <i>Streptococcus suis</i> _D9_uid162125                       | CAS-II                                                 | 2-1-9                                                                                                 |
| 389856935      | <i>Streptococcus suis</i> _ST1_uid167482                      | CAS-II-A                                               | csn2-2-1-9                                                                                            |
| 330833103      | <i>Streptococcus suis</i> _ST3_uid66327                       | CAS-II                                                 | 2-1-9                                                                                                 |
| 55822628       | <i>Streptococcus thermophilus</i> _CNRZ1066_uid58221          | CAS-II                                                 | 9-1-2                                                                                                 |
| 386344354      | <i>Streptococcus thermophilus</i> _JIM_8232_uid162157         | CAS-II                                                 | 9-1-2                                                                                                 |
| 386344649      | <i>Streptococcus thermophilus</i> _JIM_8232_uid162157         | CAS-III-A                                              | 1-2-6-10-csm2SS-csm3g7-csm4g5-csm5g7-csm6-csm6                                                        |
| 116627543      | <i>Streptococcus thermophilus</i> _LMD_9_uid58327             | CAS-II                                                 | 9-1-2                                                                                                 |
| 116627764      | <i>Streptococcus thermophilus</i> _LMD_9_uid58327             | CAS-III-A                                              | 1-2-6-csm2SS-csm3g7-csm4g5-csm5g7-x-csm6                                                              |
| 116628212      | <i>Streptococcus thermophilus</i> _LMD_9_uid58327             | CAS-II-A                                               | csn2-2-1-9                                                                                            |
| 55820736       | <i>Streptococcus thermophilus</i> _LMG_18311_uid58219         | CAS-II                                                 | 9-1-2                                                                                                 |
| 387909442      | <i>Streptococcus thermophilus</i> _MN_ZLW_002_uid166827       | CAS-II                                                 | 9-1-2                                                                                                 |
| 387909738      | <i>Streptococcus thermophilus</i> _MN_ZLW_002_uid166827       | CAS-III-A                                              | csm6-csm5g7-csm4g5-csm3g7-csm2SS-10-6-2-1                                                             |
| 387910219      | <i>Streptococcus thermophilus</i> _MN_ZLW_002_uid166827       | CAS-II-A                                               | csn2-2-1-9                                                                                            |
| 386086349      | <i>Streptococcus thermophilus</i> _ND03_uid162015             | CAS-II                                                 | 9-1-2                                                                                                 |
| 386086605      | <i>Streptococcus thermophilus</i> _ND03_uid162015             | CAS-III-A                                              | 1-2-6-10-csm2SS-csm3g7-csm4g5-csm5g7-x-csm6                                                           |
| 386087119      | <i>Streptococcus thermophilus</i> _ND03_uid162015             | CAS-II-A                                               | csn2-2-1-9                                                                                            |
| 29834079       | <i>Streptomyces avermitilis</i> _MA_4680_uid57739             | CAS-I-E                                                | 1-6e-5-7-cse2SS-8e-3                                                                                  |
| 357409215      | <i>Streptomyces flavogriseus</i> _ATCC_33331_uid40839         | CAS-I-E                                                | 3 + 3HD-8e-cse2SS-7-5-6e-1-2                                                                          |
| 182437340      | <i>Streptomyces griseus</i> _NBRC_13350_uid58983              | CAS-I-E                                                | 3 + 3HD + 8e-cse2SS-7-5-6e-1-2                                                                        |
| 386835890      | <i>Streptomyces hygrosopicus</i> _jinggangensis_5008_uid89409 | CAS-I-E                                                | 1-6e-5-7-cse2SS-8e-3 + 3HD                                                                            |
| 379008964      | <i>Sulfobacillus acidophilus</i> _DSM_10332_uid88061          | CAS-I-B                                                | 2-1-4-3 + 3HD-5-x-x-6                                                                                 |
| 339628806      | <i>Sulfobacillus acidophilus</i> _TPY_uid68841                | CAS-I-B                                                | 2-1-4-3 + 3HD-5-x-x-6                                                                                 |
| 70607609       | <i>Sulfolobus acidocaldarius</i> _DSM_639_uid58379            | CAS-I-D                                                | 3-csc1g5-csc2g7-10d-R-6-x-2-4-1-x-x-x-x-x-x-x-csm3g7                                                  |
| 70607733       | <i>Sulfolobus acidocaldarius</i> _DSM_639_uid58379            | Unknown                                                | 6-x-2-1-4                                                                                             |
| 385772426      | <i>Sulfolobus islandicus</i> _HVE10_4_uid162067               | CAS-I-A                                                | 6-csaXg8-3HD-3-5-7-csa5SS-R-4-1-2-4-R                                                                 |
| 385772765      | <i>Sulfolobus islandicus</i> _HVE10_4_uid162067               | CAS-I-D                                                | 3-csc1g5-csc2g7-x-R-6-1-x-x-x-x-x-x-x-4                                                               |
| 284997246      | <i>Sulfolobus islandicus</i> _L_D_8_5_uid43679                | CAS-I-A                                                | cmr4g7-csx1-x-x-x-x-x-4-1-2-4-R-R-csa5SS-7-5-3-3HD-csaXg8                                             |

Table S1 | Continued

| Cas1 GI number | Organism                                               | Automatically assigned CRISPR-Cas system (CAS) subtype | CRISPR-Cas-related gene neighbours (1, 2, 3, 4, 5, 6, 7, 8, 9 and 10 are respective <i>cas</i> genes) |
|----------------|--------------------------------------------------------|--------------------------------------------------------|-------------------------------------------------------------------------------------------------------|
| 284997293      | <i>Sulfolobus_islandicus_L_D_8_5_uid43679</i>          | CAS-I-D                                                | 3-csc1g5-csc2g7-x-x-R-6-x-1                                                                           |
| 227829656      | <i>Sulfolobus_islandicus_L_S_2_15_uid58871</i>         | CAS-I-A                                                | csm3g7-10-csm3g7-x-csm3g7-x-x-2-csx1-4-1-2-4-R-R-csa55S-7-5-3-3HD-csaXg8                              |
| 227827183      | <i>Sulfolobus_islandicus_M_14_25_uid58849</i>          | CAS-I                                                  | 7-5-x-3-3HD-2-1-6-x-csx1-x-4-4-csm3g7-x-csm3g7-10                                                     |
| 227827211      | <i>Sulfolobus_islandicus_M_14_25_uid58849</i>          | CAS-I-A                                                | csm6-x-x-x-R-4-2-1-4-R-csa55S-7-5-3-3HD-csaXg8-6                                                      |
| 229584404      | <i>Sulfolobus_islandicus_M_16_27_uid58851</i>          | CAS-III-A                                              | 7-5-x-3-3HD-2-1-6-x-csx1-4-4-csm3g7-x-csm3g7-10-csm3g7                                                |
| 229584430      | <i>Sulfolobus_islandicus_M_16_27_uid58851</i>          | CAS-I-A                                                | csm6-x-x-x-x-4-1-2-4-R-R-csa55S-7-5-3-3HD-csaXg8                                                      |
| 238619345      | <i>Sulfolobus_islandicus_M_16_4_uid58841</i>           | CAS-I-A                                                | cmr4g7-csx1-x-x-csm6-x-x-x-4-1-2-4-R                                                                  |
| 385775488      | <i>Sulfolobus_islandicus_REY15A_uid162071</i>          | CAS-I-A                                                | 4-1-2-4-R-R-csa55S-7-5-3-3HD-csaXg8                                                                   |
| 229578570      | <i>Sulfolobus_islandicus_Y_G_57_14_uid58923</i>        | CAS-I-A                                                | cmr3g5-x-x-x-R-4-2-x-x-1-4-R-csa55S-7-5-3-3HD-csaXg8-6                                                |
| 229582665      | <i>Sulfolobus_islandicus_Y_N_15_51_uid58825</i>        | CAS-I-A                                                | csaXg8-3HD-3-5-7-csa55S-R-R-4-2-1-4-x-x-x-x-csx1                                                      |
| 384434706      | <i>Sulfolobus_solfataricus_98_2_uid167998</i>          | CAS-I-A                                                | csx1-x-7-5-x-3-3HD-2-1-6-x-x-x-x-4-2-1-4                                                              |
| 15898245       | <i>Sulfolobus_solfataricus_P2_uid57721</i>             | CAS-I-A                                                | csx1-csa55S-7-5-csaXg8-3-3HD-2-1-6                                                                    |
| 15898286       | <i>Sulfolobus_solfataricus_P2_uid57721</i>             | CAS-I-A                                                | csaXg8-3HD-3-5-7-csa55S-R-R-x-4-1-4                                                                   |
| 15920199       | <i>Sulfolobus_tokodaii_7_uid57807</i>                  | CAS-I-A                                                | csx1-x-x-x-4-csx1-x-x-2-1-4-x-7-5-x-3-x-6                                                             |
| 15922975       | <i>Sulfolobus_tokodaii_7_uid57807</i>                  | CAS-I-A                                                | R-4-1-2-4-x-x-csa55S-7-5-3-3HD-csaXg8                                                                 |
| 188996612      | <i>Sulfurihydrogenibium_YO3AOP1_uid58855</i>           | CAS-I-B                                                | 6-x-8a1-7-5-3 + 3HD-4-1-2                                                                             |
| 225848645      | <i>Sulfurihydrogenibium_azorense_Az_Fu1_uid58121</i>   | CAS-I-B                                                | 6-8a1-7-5-3 + 3HD-4-1-2                                                                               |
| 390940098      | <i>Sulfurospirillum_barnesii_SES_3_uid168117</i>       | CAS-I-B                                                | 6-x-x-5-3-4-1-2                                                                                       |
| 268679538      | <i>Sulfurospirillum_deleyianum_DSM_6946_uid41861</i>   | CAS-I-B                                                | 6-x-7-5-3 + 3HD-4-1-2                                                                                 |
| 51891801       | <i>Symbiobacterium_thermophilum_IAM_14863_uid58165</i> | CAS-I-E                                                | 1-3-8e-cse2SS-7-5-6e                                                                                  |
| 86608317       | <i>Synechococcus_JA_2_3B_a_2_13_uid58537</i>           | CAS-III-B                                              | 2-1-x-cmr1g7 + csm3g7-x-x-cmr4g7-cmr3g5-10-csx1                                                       |
| 86605441       | <i>Synechococcus_JA_3_3Ab_uid58535</i>                 | CAS-I-E                                                | 2-1-6e-5-7-cse2SS-8e-3 + 3HD                                                                          |
| 427712290      | <i>Synechococcus_PCC_6312_uid182934</i>                | CAS-I-C                                                | 2-1 + 4-x-x-5-7-8c + 8c2-3 + 3HD-x-x-6                                                                |
| 427713845      | <i>Synechococcus_PCC_6312_uid182934</i>                | CAS-III-B                                              | 2-1-x-x-x-cmr1g7 + cmr6g7-x-cmr4g7-cmr3g5-10                                                          |
| 170078384      | <i>Synechococcus_PCC_7002_uid59137</i>                 | CAS-I-C                                                | 6-3 + 3HD-8c + 8c2-7-x-x-5-1 + 4-2                                                                    |
| 170079501      | <i>Synechococcus_PCC_7002_uid59137</i>                 | CAS-I-D                                                | 2-1-4-6-csc1g5-csc2g7-10d-3                                                                           |
| 170079607      | <i>Synechococcus_PCC_7002_uid59137</i>                 | CAS-III-B                                              | cmr1g7 + cmr6g7-x-cmr4g7-cmr3g5-10-x-x-x-x-1                                                          |
| 428222741      | <i>Synechococcus_PCC_7502_uid183008</i>                | CAS-III-B                                              | 2-1-x-x-csm6-x-cmr1g7 + cmr6g7-x-x-cmr4g7-cmr3g5-10                                                   |

Table S1 | Continued

| Cas1 GI number | Organism                                                            | Automatically assigned CRISPR-Cas system (CAS) subtype | CRISPR-Cas-related gene neighbours (1, 2, 3, 4, 5, 6, 7, 8, 9 and 10 are respective <i>cas</i> genes) |
|----------------|---------------------------------------------------------------------|--------------------------------------------------------|-------------------------------------------------------------------------------------------------------|
| 38505684       | <i>Synechocystis_PCC_6803_uid57659</i>                              | CAS-I-D                                                | 3-10d-csc2g7-csc1g5-6-4-1-2                                                                           |
| 38505739       | <i>Synechocystis_PCC_6803_uid57659</i>                              | CAS-III-A                                              | csx1-csm6-csm3g7-x-csm3g7-5g10 + csm3g7-10-6-x-x-1-2                                                  |
| 38505760       | <i>Synechocystis_PCC_6803_uid57659</i>                              | CAS-III-B                                              | cmr6g7-cmr5S5-cmr4g7-x-cmr3g5-10-csx18-1-2                                                            |
| 116748794      | <i>Syntrophobacter_fumaroxidans_MPOB_uid58177</i>                   | CAS-III-A                                              | csm5g7-csm4g5-csm3g7-csm2S5-10-6-csx20-csx1-x-Prim2-1-2                                               |
| 116750256      | <i>Syntrophobacter_fumaroxidans_MPOB_uid58177</i>                   | CAS-I-E                                                | 3 + 3HD-8e-cse2S5-7-5-6e-1-2                                                                          |
| 325289071      | <i>Syntrophobotulus_glycolicus_DSM_8271_uid63343</i>                | CAS-I-C                                                | 3-5-8c-7-4-1-2                                                                                        |
| 325289514      | <i>Syntrophobotulus_glycolicus_DSM_8271_uid63343</i>                | CAS-I-B                                                | 6-8a1-7-5-3-4-1-2                                                                                     |
| 114566032      | <i>Syntrophomonas_wolfei_Goettingen_uid58179</i>                    | CAS-I-C                                                | 3-5-8c-7-4-1-2                                                                                        |
| 114567264      | <i>Syntrophomonas_wolfei_Goettingen_uid58179</i>                    | CAS-III-A                                              | csm6-x-2-1-x-6-csm5g7-csm4g5-csm3g7-csm2S5-10                                                         |
| 114567318      | <i>Syntrophomonas_wolfei_Goettingen_uid58179</i>                    | CAS-I-B                                                | 2-1-4-3 + 3HD-5-x-x-6                                                                                 |
| 114568021      | <i>Syntrophomonas_wolfei_Goettingen_uid58179</i>                    | CAS-I-B                                                | 6-2-1-4-3 + 3HD-5-x-8-8-x-csm3g7-x-csm3g7                                                             |
| 297617513      | <i>Syntrophothermus_lipocalidus_DSM_12680_uid49527</i>              | CAS-III-B                                              | 6-x-2-1-4-3 + 3HD-5-7-8a1-x-x-cmr6g7-cmr5S5-cmr4g7                                                    |
| 297617712      | <i>Syntrophothermus_lipocalidus_DSM_12680_uid49527</i>              | CAS-I-C                                                | 2-1-4-x-8c-5-3 + 3HD                                                                                  |
| 85858452       | <i>Syntrophus_aciditrophicus_SB_uid58539</i>                        | CAS-III-B                                              | cmr5S5-cmr6g7-csm6-csx1-x-x-x-x-x-1-2-2                                                               |
| 85860584       | <i>Syntrophus_aciditrophicus_SB_uid58539</i>                        | CAS-I-C                                                | 2-1-4-7-8c-5-3                                                                                        |
| 375256010      | <i>Tannerella_forsythia_ATCC_43037_uid83157</i>                     | CAS-III-A                                              | 3-x-x-4-10-csm2S5-csm3g7-csm4g5-csm5g7-csx1-1-2                                                       |
| 348589565      | <i>Taylorella_asinigenitalis_MCE3_uid73771</i>                      | CAS-I-F                                                | 1-3f                                                                                                  |
| 397661233      | <i>Taylorella_equigenitalis_ATCC_35865_uid170255</i>                | CAS-I-C                                                | 3-2-1-4-7-8c-5                                                                                        |
| 254787056      | <i>Teredinibacter_turnerae_T7901_uid59267</i>                       | CAS-I-C                                                | 2-1-4-7-8c-5-3                                                                                        |
| 217970636      | <i>Thauera_MZ1T_uid58987</i>                                        | CAS-I-E                                                | 3 + 3HD-8e-cse2S5-7-5-6e-1-2                                                                          |
| 410668222      | <i>Thermacetogenium_phaeum_DSM_12270_uid177811</i>                  | CAS-I-D                                                | 4-4-2-1-x-x-csc2g7-x-x-3HD-3-x-6                                                                      |
| 410668744      | <i>Thermacetogenium_phaeum_DSM_12270_uid177811</i>                  | CAS-I-B                                                | 6-2-1-4-3 + 3HD-5-x-8-8-csx1-6-x-csm3g7                                                               |
| 296133388      | <i>Thermincola_potens_JR_uid48823</i>                               | CAS-I-C                                                | 2-1-4-7-8c-5-3 + 3HD                                                                                  |
| 296133514      | <i>Thermincola_potens_JR_uid48823</i>                               | CAS-III-A                                              | 2-1-csm6-6-csm5g7-csm4g5-csm3g7-csm2S5-10                                                             |
| 296133980      | <i>Thermincola_potens_JR_uid48823</i>                               | CAS-I-B                                                | 5g10 + csm3g7-10-csx1-x-x-x-x-x-x-2-1-4-3 + 3HD-5-x-8-8-x-6                                           |
| 307725454      | <i>Thermoanaerobacter_X513_uid53065</i>                             | CAS-I-B                                                | 2-1-4-x-x-x-3 + 3HD-5-x-8-6                                                                           |
| 167040929      | <i>Thermoanaerobacter_X514_uid58589</i>                             | CAS-I-B                                                | 2-1-4-x-x-x-3 + 3HD-5-x-8-6                                                                           |
| 320114993      | <i>Thermoanaerobacter_brockii_finnii_Ako_1_uid55639</i>             | CAS-I-B                                                | 8-x-5-3-x-x-x-x-x-4-1-2                                                                               |
| 289579423      | <i>Thermoanaerobacter_italicus_Ab9_uid46241</i>                     | CAS-I-B                                                | 2-1-4-x-x-x-3-5-x-8                                                                                   |
| 297543518      | <i>Thermoanaerobacter_mathranii_A3_uid49481</i>                     | CAS-I-B                                                | 2-1-4-3 + 3HD-5-7-8a1-6                                                                               |
| 297545564      | <i>Thermoanaerobacter_mathranii_A3_uid49481</i>                     | CAS-I-B                                                | 2-1-4-x-x-x-x-x-3 + 3HD-5-x-8                                                                         |
| 167036565      | <i>Thermoanaerobacter_pseudethanolicus_ATCC_33223_uid58339</i>      | CAS-I-B                                                | 5-3-x-x-x-x-x-x-x-4-1-2                                                                               |
| 20809002       | <i>Thermoanaerobacter_tengcongensis_MB4_uid57813</i>                | CAS-I                                                  | 2-1-4-3 + 3HD-5-7-8a1-6-csx15-csx1 + x-6                                                              |
| 345018873      | <i>Thermoanaerobacter_wiegellii_Rt8_B1_uid52581</i>                 | CAS-I-B                                                | 2-1-4-x-x-3 + 3HD-5-x-8-x-6                                                                           |
| 390933511      | <i>Thermoanaerobacterium_saccharolyticum_JW_SL_YS485_uid167781</i>  | CAS-I-B                                                | 2-1-4-x-3 + 3HD-5-x-8-6                                                                               |
| 304318003      | <i>Thermoanaerobacterium_thermosaccharolyticum_DSM_571_uid51639</i> | CAS-I-B                                                | csx1-2-1-4-x-x-x-x-x-3 + 3HD-5-x-8                                                                    |

Table S1 | Continued

| Cas1 GI number | Organism                                                            | Automatically assigned CRISPR-Cas system (CAS) subtype | CRISPR-Cas-related gene neighbours (1, 2, 3, 4, 5, 6, 7, 8, 9 and 10 are respective <i>cas</i> genes) |
|----------------|---------------------------------------------------------------------|--------------------------------------------------------|-------------------------------------------------------------------------------------------------------|
| 304318086      | <i>Thermoanaerobacterium_thermosaccharolyticum_DSM_571_uid51639</i> | CAS-I                                                  | 6-2-1-4-x-7-x-3 + 3HD                                                                                 |
| 433656210      | <i>Thermoanaerobacterium_thermosaccharolyticum_M0795_uid184821</i>  | CAS-I-B                                                | 2-1-4-x-x-3 + 3HD-5-x-8-6-x-csm3g7                                                                    |
| 333898074      | <i>Thermoanaerobacterium_xylanolyticum_LX_11_uid63163</i>           | CAS-I-B                                                | 2-1-4-x-3 + 3HD-5-x-8-6-x-csm3g7-csm3g7                                                               |
| 333898147      | <i>Thermoanaerobacterium_xylanolyticum_LX_11_uid63163</i>           | CAS-I-A                                                | 6-2-1-4-3-5-7-8a1                                                                                     |
| 430751276      | <i>Thermobacillus_composti_KWC4_uid74021</i>                        | CAS-I-B                                                | 5g10 + csm3g7-x-csx1-x-x-x-x-x-2-1-4-3 + 3HD-5-x-x-6                                                  |
| 269838937      | <i>Thermobaculum_terrenum_ATCC_BAA_798_uid42011</i>                 | CAS-I-E                                                | 3 + 3HD-8e-cse2SS-7-5-6e-1-2                                                                          |
| 269839455      | <i>Thermobaculum_terrenum_ATCC_BAA_798_uid42011</i>                 | CAS-I-B                                                | 8a1-x-5-3 + 3HD-4-1-2                                                                                 |
| 72161989       | <i>Thermobifida_fusca_YX_uid57703</i>                               | CAS-I-E                                                | 10-cmr3g5-cmr4g7-cmr5SS-cmr6g7-cmr1g7-1-6e-5-7-cse2SS-8e-3 + 3HD-6e-5-7-cse2SS                        |
| 296269507      | <i>Thermobispora_bispora_DSM_43833_uid48999</i>                     | CAS-I-E                                                | 2-1-6e-5-7-cse2SS-8e-3                                                                                |
| 341581203      | <i>Thermococcus_4557_uid70841</i>                                   | CAS-I-B                                                | 3-4-2-1-5-7-x-6                                                                                       |
| 341581817      | <i>Thermococcus_4557_uid70841</i>                                   | CAS-I                                                  | 6-3 + 3HD-x-x-7-x-4-1-4-2                                                                             |
| 223476990      | <i>Thermococcus_AM4_uid54735</i>                                    | CAS-I-B                                                | 2-4-1-4-3-5-7-x-x-6                                                                                   |
| 390960552      | <i>Thermococcus_CL1_uid168259</i>                                   | CAS-I-A                                                | 6-8a1-7-5-3 + 3HD-4-1-4-2                                                                             |
| 390961970      | <i>Thermococcus_CL1_uid168259</i>                                   | CAS-I-B                                                | 3-4-2-1-5-7-x-6                                                                                       |
| 390962116      | <i>Thermococcus_CL1_uid168259</i>                                   | CAS-III-A                                              | 6-10-csm2SS-csm3g7-csm4g5-csm5g7-R2-csx3-2-1                                                          |
| 315230242      | <i>Thermococcus_barophilus_MP_uid54733</i>                          | CAS-I                                                  | 6-3 + 3HD-x-x-7-5-4-1-2                                                                               |
| 57640390       | <i>Thermococcus_kodakarensis_KOD1_uid58225</i>                      | CAS-I-A                                                | 2-4-6-R-3HD-3-8a2-5-7-csa5SS-1-x-x-4-x-3-5-7-8a1-6                                                    |
| 242399467      | <i>Thermococcus_sibiricus_MM_739_uid59399</i>                       | CAS-I-B                                                | 6-x-7-5-3 + 3HD-4-1-4-2                                                                               |
| 337285608      | <i>Thermodesulfatator_indicus_DSM_15286_uid68285</i>                | CAS-I                                                  | cmr4g7 + csm3g7-x-x-x-x-7-5-3 + 3HD-x-4-1-2                                                           |
| 337286709      | <i>Thermodesulfatator_indicus_DSM_15286_uid68285</i>                | CAS-III-B                                              | cmr5SS-cmr4g7-x-x-cmr3g5-10-cmr1g7-x-2-x-1-2-6                                                        |
| 337288662      | <i>Thermodesulfobacterium_OPB45_uid68283</i>                        | CAS-III-A                                              | 10-csm2SS-csm3g7-csm4g5-csm5g7-6-csx1-x-2-1-2                                                         |
| 337288767      | <i>Thermodesulfobacterium_OPB45_uid68283</i>                        | CAS-I-B                                                | 6-5-3-4-1-2                                                                                           |
| 332295661      | <i>Thermodesulfobium_narugense_DSM_14796_uid66601</i>               | CAS-III-A                                              | 6-8-x-5-3-4-1-2-x-csx1-10-5g10 + csm3g7 + x-csm3g7-x-csm3g7                                           |
| 332296542      | <i>Thermodesulfobium_narugense_DSM_14796_uid66601</i>               | CAS-III-A                                              | 4-x-2-1-Prim2-csm5g7-csm4g5-csm3g7-csm2SS-10-csx1-csx1-6                                              |
| 206890539      | <i>Thermodesulfobivrio_yellowstonii_DSM_11347_uid59257</i>          | CAS-III-A                                              | csm2SS-csm3g7-csm4g5-csm5g7-6-x-x-x-x-2-1-1-2                                                         |
| 206889641      | <i>Thermodesulfobivrio_yellowstonii_DSM_11347_uid59257</i>          | CAS-III-B                                              | cmr6g7-10-cmr4g7-x-x-csa5SS-x-7-5-4-1                                                                 |
| 206889560      | <i>Thermodesulfobivrio_yellowstonii_DSM_11347_uid59257</i>          | CAS-I-B                                                | 2-x-1-4-x-3-5-7-8a1-6                                                                                 |
| 119720226      | <i>Thermofilum_pendens_Hrk_5_uid58563</i>                           | CAS-III-B                                              | cmr3g5-10-cmr6g7-cmr1g7-cmr5SS-cmr4g7-1-2-3-csc1g5-csc2g7-x-10d                                       |
| 389861365      | <i>Thermogladius_1633_uid167488</i>                                 | CAS-I-A                                                | 6-x-x-4-1-4-R                                                                                         |
| 221632058      | <i>Thermomicrobium_roseum_DSM_5159_uid59341</i>                     | CAS-I-B                                                | 6-8b-7-5-3 + 3HD-4-1-2                                                                                |

Table S1 | Continued

| Cas1 GI number | Organism                                               | Automatically assigned CRISPR-Cas system (CAS) subtype | CRISPR-Cas-related gene neighbours (1, 2, 3, 4, 5, 6, 7, 8, 9 and 10 are respective <i>cas</i> genes) |
|----------------|--------------------------------------------------------|--------------------------------------------------------|-------------------------------------------------------------------------------------------------------|
| 269125191      | <i>Thermomonospora_curvata</i> _DSM_43183_uid41885     | CAS-I-E                                                | 6-x-7-3 + 3HD + 5-4-1-2-x-x-3 + 3HD-8e + cse2SS-7-5-6e-1-2                                            |
| 269125200      | <i>Thermomonospora_curvata</i> _DSM_43183_uid41885     | CAS-I-E                                                | 6-x-7-3 + 3HD + 5-4-1-2-x-x-3 + 3HD-8e + cse2SS-7-5-6e-1-2                                            |
| 269126905      | <i>Thermomonospora_curvata</i> _DSM_43183_uid41885     | CAS-I-E                                                | 3 + 3HD-8e-cse2SS-7-5-6e-1-2                                                                          |
| 13540937       | <i>Thermoplasma_volcanium</i> _GSS1_uid57751           | CAS-III-A                                              | 2-1-csx1-csm5g7-csm4g5-csm3g7-csm2SS-10-6-csm6                                                        |
| 302388669      | <i>Thermosediminibacter_oceani</i> _DSM_16646_uid51421 | CAS-I-B                                                | 6-x-5-3 + 3HD-4-1-2-x-x-6                                                                             |
| 217076447      | <i>Thermosiphon_africanus</i> _TCF52B_uid59095         | CAS-III-B                                              | cmr3g5-10-cmr1g7-6-csx1-x-x-x-x-2-1-2                                                                 |
| 217077321      | <i>Thermosiphon_africanus</i> _TCF52B_uid59095         | CAS-I-B                                                | 2-1-4-x-x-3-5-x-8-6                                                                                   |
| 217078000      | <i>Thermosiphon_africanus</i> _TCF52B_uid59095         | CAS-I-B                                                | 2-1-4-3 + 3HD-5-x-8b-6                                                                                |
| 150020249      | <i>Thermosiphon_melanesiensis</i> _BI429_uid58683      | CAS-I-B                                                | 2-1-4-x-3-5-x-8b-6                                                                                    |
| 150021526      | <i>Thermosiphon_melanesiensis</i> _BI429_uid58683      | CAS-III-B                                              | 2-1-2-x-x-x-csm6-cmr1g7-10-cmr3g5-cmr4g7-cmr5SS                                                       |
| 296242547      | <i>Thermosphaera_aggregans</i> _DSM_11486_uid48993     | CAS-I-A                                                | 3HD-3-x-5-7-x-R-R-4-2-1-4                                                                             |
| 170288818      | <i>Thermotoga_RQ2</i> _uid58935                        | CAS-III-B                                              | csm5g7-x-x-x-x-8a1-7-5-3-4-1-2-cmr1g7-10-cmr3g5-cmr4g7-cmr5SS-cmr6g7                                  |
| 157363075      | <i>Thermotoga_lettingae</i> _TMO_uid58419              | CAS-I-B                                                | 3 + 3HD-5-7-8-2-1-4-6                                                                                 |
| 15644541       | <i>Thermotoga_maritima</i> _MSB8_uid57723              | CAS-III-B                                              | cmr6g7-cmr4g7-cmr3g5-10-cmr1g7-2-1-4-3-5-7-8a1-x-x-x-x-csm5g7                                         |
| 222099688      | <i>Thermotoga_neapolitana</i> _DSM_4359_uid59065       | CAS-I-B                                                | 6-8a1-7-5-3-4-1-2                                                                                     |
| 148270212      | <i>Thermotoga_petrophila</i> _RKU_1_uid58655           | CAS-I-B                                                | 2-1-4-3 + 3HD-5-7-8a1-6                                                                               |
| 338730939      | <i>Thermotoga_thermarum</i> _DSM_5069_uid68449         | CAS-III-B                                              | csx1 + x-csm6-6-x-7-5-3 + 3HD-4-1-2-x-x-x-cmr1g7 + x-x-cmr1g7-10-cmr3g5-csm6                          |
| 338731442      | <i>Thermotoga_thermarum</i> _DSM_5069_uid68449         | CAS-I-B                                                | 6-4-1-2-8-7-5-3 + 3HD                                                                                 |
| 319790504      | <i>Thermovibrio_ammonificans</i> _HB_1_uid62095        | Unknown                                                | 2-2-2-1                                                                                               |
| 357419113      | <i>Thermovirga_lienii</i> _DSM_17291_uid77129          | CAS-I-B                                                | 6-8a1-8b-x-5-3 + 3HD-4-1-2                                                                            |
| 384438634      | <i>Thermus_CCB_US3_UF1</i> _uid81197                   | CAS-III-B                                              | cmr6g7-cmr5SS-cmr4g7-cmr1g7-cmr3g5-10-csx1-1-4-4-3 + 3HD-6-8a1-x-x-2                                  |
| 384439730      | <i>Thermus_CCB_US3_UF1</i> _uid81197                   | CAS-III-A                                              | 6-10-csm2SS-csm3g7-csm4g5-csm5g7-csx1-2-x-1-csx1                                                      |
| 410732171      | <i>Thermus_oshimai</i> _JL_2_uid178948                 | CAS-I-E                                                | 3 + 3HD-8e-cse2SS-7-5-6e-1-2                                                                          |
| 320450318      | <i>Thermus_scotoductus</i> _SA_01_uid62273             | CAS-I-E                                                | 2-1-6e-5-7-cse2SS-8e-3 + 3HD                                                                          |
| 46255267       | <i>Thermus_thermophilus</i> _HB27_uid58033             | CAS-I-A                                                | 2-1-4-x-8a-7-5-6                                                                                      |
| 55978328       | <i>Thermus_thermophilus</i> _HB8_uid58223              | CAS-III-A                                              | csx1-1-x-10-csm2SS-csm3g7-csm4g5-csm5g7-csx1-x-x-csx1                                                 |
| 55978376       | <i>Thermus_thermophilus</i> _HB8_uid58223              | CAS-I-E                                                | 3 + 3HD-8e-cse2SS-7-5-6e-1-2                                                                          |
| 55978407       | <i>Thermus_thermophilus</i> _HB8_uid58223              | CAS-I                                                  | 2-1-4-x-x-x-x-3 + x-6                                                                                 |
| 386361489      | <i>Thermus_thermophilus</i> _JL_18_uid162129           | CAS-I-E                                                | 3 + 3HD-8e-cse2SS-7-5-6e-1-2                                                                          |
| 386361517      | <i>Thermus_thermophilus</i> _JL_18_uid162129           | CAS-I                                                  | 2-1-4-x-x-x-x-3 + x-6                                                                                 |
| 384432243      | <i>Thermus_thermophilus</i> _SG0_5JP17_16_uid159537    | CAS-I                                                  | 2-1-4-x-x-x-x-3 + x-6                                                                                 |
| 384432300      | <i>Thermus_thermophilus</i> _SG0_5JP17_16_uid159537    | CAS-I-C                                                | 3-5-8c-x-4-1-2                                                                                        |
| 289209607      | <i>Thioalkalivibrio_K90mix</i> _uid46181               | CAS-I-F                                                | 1-3f-8f-5f-7f-6f                                                                                      |

Table S1 | Continued

| Cas1 GI number | Organism                                                     | Automatically assigned CRISPR-Cas system (CAS) subtype | CRISPR-Cas-related gene neighbours (1, 2, 3, 4, 5, 6, 7, 8, 9 and 10 are respective <i>cas</i> genes) |
|----------------|--------------------------------------------------------------|--------------------------------------------------------|-------------------------------------------------------------------------------------------------------|
| 430760780      | <i>Thioalkalivibrio_nitratireducens</i> _DSM_14787_uid184011 | CAS-III-B                                              | cmr4g7-cmr5SS-cmr6g7-csx1-x-csx1-x-x-6-2-1-1-2                                                        |
| 430761718      | <i>Thioalkalivibrio_nitratireducens</i> _DSM_14787_uid184011 | CAS-I-F                                                | 6f-7f-5f-8f-3f-1                                                                                      |
| 220934970      | <i>Thioalkalivibrio_sulfidophilus</i> _HL_EbGr7_uid59179     | CAS-III-B                                              | cmr1g7-10-cmr3g5-cmr4g7-cmr5SS-cmr6g7-csx1-x-csx1-x-1-2-x-csx1                                        |
| 220935599      | <i>Thioalkalivibrio_sulfidophilus</i> _HL_EbGr7_uid59179     | CAS-I-U                                                | 2-1 + 4-x-x-x-x-csb2-7-8x1-3                                                                          |
| 390948892      | <i>Thiocystis_violascens</i> _DSM_198_uid74025               | CAS-I-E                                                | 3-8e-cse2SS-7-5-6e-x-x-1-2                                                                            |
| 390949470      | <i>Thiocystis_violascens</i> _DSM_198_uid74025               | CAS-I-E                                                | 2-1-6e-5-7-x-8e-3 + 3HD                                                                               |
| 390952676      | <i>Thiocystis_violascens</i> _DSM_198_uid74025               | CAS-III-B                                              | 4-2-1-x-x-x-cmr3g5-10-cmr1g7-csx1                                                                     |
| 431929780      | <i>Thioflavicoccus_mobilis</i> _8321_uid184343               | CAS-III-B                                              | cmr4g7-cmr3g5-10-cmr1g7-csx1-x-x-x-2-2-1-RT                                                           |
| 431930657      | <i>Thioflavicoccus_mobilis</i> _8321_uid184343               | CAS-I-U                                                | 2-1 + 4-x-3-csb2-csb1                                                                                 |
| 389875622      | <i>Tistrella_mobilis</i> _KA081020_065_uid167486             | CAS-III-A                                              | 10-cmr4g7-csm3g7-csm3g7-6-x-1 + RT-2                                                                  |
| 389874620      | <i>Tistrella_mobilis</i> _KA081020_065_uid167486             | CAS-I-C                                                | 2-1-4-7-8c-5-3 + 3HD                                                                                  |
| 389874753      | <i>Tistrella_mobilis</i> _KA081020_065_uid167486             | CAS-II                                                 | 2-1-9                                                                                                 |
| 237808119      | <i>Tolomonas_auensis</i> _DSM_9187_uid59395                  | CAS-I-F                                                | 1-3f-8f-5f-7f-6f                                                                                      |
| 333996012      | <i>Treponema_azotonutricium</i> _ZAS_9_uid67365              | CAS-III-B                                              | csx20-csx1-cmr6g7-cmr5SS-cmr4g7-cmr3g5-10-cmr1g7-6-x-1-2-x-csx1                                       |
| 332298797      | <i>Treponema_brennaborensis</i> _DSM_12168_uid66607          | CAS-I-C                                                | 2-1-4-7-8c-5-3                                                                                        |
| 42525844       | <i>Treponema_denticola</i> _ATCC_35405_uid57583              | CAS-II-A                                               | 9-1-2-csn2                                                                                            |
| 328949009      | <i>Treponema_succinifaciens</i> _DSM_2489_uid65781           | CAS-III-A                                              | csx1-x-x-2-2-1-x-x-csx20-csx1-x-csm5g7-csm4g5-csm3g7-csm2SS                                           |
| 297622675      | <i>Trueperia_radiovictrix</i> _DSM_17093_uid49533            | CAS-III-U                                              | 2-1-csx1-csx1-6                                                                                       |
| 297623899      | <i>Trueperia_radiovictrix</i> _DSM_17093_uid49533            | CAS-III-B                                              | 7-cmr1g7-10-cmr3g5-cmr4g7-cmr5SS-cmr6g7-csx1-csm6-4-1-2                                               |
| 297624524      | <i>Trueperia_radiovictrix</i> _DSM_17093_uid49533            | CAS-I-E                                                | 2-1-6e-5-7-cse2SS-8e-x-3 + 3HD                                                                        |
| 269798874      | <i>Veillonella_parvula</i> _DSM_2008_uid41927                | CAS-III-A                                              | 6-csm3g7-csx19-csm3g7-5g10-csm3g7-10-csx20-1-2-x-csx1-csx1                                            |
| 121608212      | <i>Verminephrobacter_eiseniae</i> _EF01_2_uid58675           | CAS-II                                                 | 9-1-2                                                                                                 |
| 121608431      | <i>Verminephrobacter_eiseniae</i> _EF01_2_uid58675           | CAS-I-F                                                | 6f-7f-5f-8f-3f-1                                                                                      |
| 330467207      | <i>Verrucosipora_maris</i> _AB_18_032_uid66297               | CAS-I-E                                                | 3 + 3HD-8e-cse2SS-7-5-6e-1-2                                                                          |
| 227116690      | <i>Vibrio_cholerae</i> _O395_uid159869                       | CAS-I-E                                                | 3 + 3HD-8e-cse2SS-6e-7-5-1-2                                                                          |
| 147674033      | <i>Vibrio_cholerae</i> _O395_uid58425                        | CAS-I-E                                                | 3 + 3HD-8e-cse2SS-6e-7-5-1-2                                                                          |
| 37677204       | <i>Vibrio_vulnificus</i> _YJ016_uid58007                     | CAS-III                                                | 6-csm3g7-x-csm3g7-5g10-cmr4g7-10-x-x-1 + RT-2-2-csx1-csx16-csx16-csm6                                 |
| 307595807      | <i>Vulcanisaeta_distributa</i> _DSM_14429_uid52827           | CAS-I-A                                                | 3HD-3-x-5-7-x-R-x-4-2-1-4                                                                             |
| 325968915      | <i>Vulcanisaeta_moutnovskia</i> _768_28_uid63631             | CAS-I-A                                                | 6-3HD-3-x-5-7-x-x-4-2-1-4                                                                             |
| 325955458      | <i>Weeksella_virosa</i> _DSM_16922_uid63627                  | CAS-II                                                 | 2-1-9                                                                                                 |
| 34557789       | <i>Wolinella_succinogenes</i> _DSM_1740_uid61591             | CAS-II                                                 | 2-1-9                                                                                                 |
| 34557933       | <i>Wolinella_succinogenes</i> _DSM_1740_uid61591             | CAS-II-B                                               | 9-1-2-4                                                                                               |
| 285019651      | <i>Xanthomonas_albilineans</i> _GPE_PC73_uid43163            | CAS-I-C                                                | 3-x-5-8c-7-4-1-2                                                                                      |



Table S1 | Continued

| Cas1 GI number | Organism                                                       | Automatically assigned CRISPR-Cas system (CAS) subtype | CRISPR-Cas-related gene neighbours (1, 2, 3, 4, 5, 6, 7, 8, 9 and 10 are respective <i>cas</i> genes) |
|----------------|----------------------------------------------------------------|--------------------------------------------------------|-------------------------------------------------------------------------------------------------------|
| 285019808      | <i>Xanthomonas albilineans</i> _GPE_PC73_uid43163              | CAS-I-F                                                | 1-3f-8f-5f-7f-6f                                                                                      |
| 21244566       | <i>Xanthomonas axonopodis</i> _citri_306_uid57889              | CAS-I-C                                                | 3-5-8c-7-4-1-2                                                                                        |
| 384429891      | <i>Xanthomonas campestris</i> _raphani_756C_uid159539          | CAS-I-F                                                | 1-3f-8f-5f-7f-6f                                                                                      |
| 58580490       | <i>Xanthomonas oryzae</i> _KACC_10331_uid58155                 | CAS-I-C                                                | 2-1-4-7-8c-5-3 + 3HD                                                                                  |
| 84622450       | <i>Xanthomonas oryzae</i> _MAFF_311018_uid5847                 | CAS-I-C                                                | 2-1-4-7-8c-5-3 + 3HD                                                                                  |
| 188578573      | <i>Xanthomonas oryzae</i> _PX099A_uid59131                     | CAS-I-C                                                | 3 + 3HD-5-8c-7-4-1-2                                                                                  |
| 290476726      | <i>Xenorhabdus bovienii</i> _SS_2004_uid46345                  | CAS-I-E                                                | 3 + 3HD-8e-cse2SS-7-5-6e-1-2                                                                          |
| 300724526      | <i>Xenorhabdus nematophila</i> _ATCC_19061_uid49133            | CAS-I-E                                                | 3 + 3HD-8e-cse2SS-7-5-6e-1-2                                                                          |
| 384139707      | <i>Yersinia pestis</i> _A1122_uid158119                        | CAS-I-F                                                | 1-3f-x-8f-5f-7f-6f                                                                                    |
| 162418150      | <i>Yersinia pestis</i> _Angola_uid58485                        | CAS-I-F                                                | 6f-7f-5f-8f-1                                                                                         |
| 108807960      | <i>Yersinia pestis</i> _Antiqua_uid58607                       | CAS-I-F                                                | 6f-7f-5f-8f-3f-1                                                                                      |
| 218929557      | <i>Yersinia pestis</i> _CO92_uid57621                          | CAS-I-F                                                | 6f-7f-5f-8f-x-3f-1                                                                                    |
| 384122748      | <i>Yersinia pestis</i> _D106004_uid158071                      | CAS-I-F                                                | 6f-7f-5f-8f-3f-1                                                                                      |
| 384126682      | <i>Yersinia pestis</i> _D182038_uid158073                      | CAS-I-F                                                | 1-3f-3f-8f-5f-7f-6f                                                                                   |
| 22125615       | <i>Yersinia pestis</i> _KIM_10_uid57875                        | CAS-I-F                                                | 1-x-3f-8f-5f-7f-6f                                                                                    |
| 108812225      | <i>Yersinia pestis</i> _Nepal516_uid58609                      | CAS-I-F                                                | 6f-7f-5f-8f-3f-1                                                                                      |
| 145599164      | <i>Yersinia pestis</i> _Pestoides_F_uid58619                   | CAS-I-F                                                | 6f-7f-5f-8f-3f-1                                                                                      |
| 294504227      | <i>Yersinia pestis</i> _Z176003_uid47317                       | CAS-I-F                                                | 6f-7f-5f-8f-3f-1                                                                                      |
| 384414198      | <i>Yersinia pestis</i> _biovar_Medievalis_Harbin_35_uid158537  | CAS-I-F                                                | 1-3f-8f-5f-7f-6f                                                                                      |
| 45442077       | <i>Yersinia pestis</i> _biovar_Microtus_91001_uid58037         | CAS-I-F                                                | 6f-7f-5f-8f-x-3f-1                                                                                    |
| 153949474      | <i>Yersinia pseudotuberculosis</i> _JP_31758_uid58487          | CAS-I-F                                                | 1-3f-8f-5f-7f-6f                                                                                      |
| 51596831       | <i>Yersinia pseudotuberculosis</i> _JP_32953_uid58157          | CAS-I-F                                                | 6f-7f-5f-8f-3f-1                                                                                      |
| 186895909      | <i>Yersinia pseudotuberculosis</i> _PB1__uid59153              | CAS-I-F                                                | 6f-7f-5f-8f-3f-1                                                                                      |
| 170023885      | <i>Yersinia pseudotuberculosis</i> _YPIII_uid59151             | CAS-I-F                                                | 1-3f-8f-5f-7f-6f                                                                                      |
| 295136245      | <i>Zunongwangia profunda</i> _SM_A87_uid48073                  | CAS-II                                                 | 9-1-x-2                                                                                               |
| 384411531      | <i>Zymomonas mobilis</i> _ATCC_10988_uid55403                  | CAS-I-F                                                | 7f-5f-8f-3f-1                                                                                         |
| 397676481      | <i>Zymomonas mobilis</i> _ATCC_29191_uid170612                 | CAS-I-F                                                | 6f-7f-5f-8f-3f-1                                                                                      |
| 260752826      | <i>Zymomonas mobilis</i> _NCIMB_11163_uid41019                 | CAS-I-F                                                | 6f-7f-5f-8f-3f-1                                                                                      |
| 260738831      | <i>Zymomonas mobilis</i> _NCIMB_11163_uid41019                 | CAS-I-C                                                | 3 + 3HD-5-8c-7-4-1-2                                                                                  |
| 283856307      | <i>Zymomonas mobilis</i> _ZM4_uid58095                         | CAS-I-F                                                | 1-3f-8f-5f-7f-6f                                                                                      |
| 338707995      | <i>Zymomonas mobilis</i> _pomaceae_ATCC_29192_uid68445         | CAS-I-E                                                | 2-1-6e-5-7-cse2SS-8e-3                                                                                |
| 338708688      | <i>Zymomonas mobilis</i> _pomaceae_ATCC_29192_uid68445         | CAS-I-C                                                | 2-1-4-7-8c-5-3 + 3HD                                                                                  |
| 304310409      | <i>Gamma proteobacterium</i> _HdN1_uid51635                    | CAS-I-E                                                | 3-8e-cse2SS-7-5-6e-x-1-2                                                                              |
| 304313028      | <i>Gamma proteobacterium</i> _HdN1_uid51635                    | CAS-II                                                 | 1-9                                                                                                   |
| 345004201      | <i>Halophilic archaeon</i> _DL31_uid72619                      | CAS-I-D                                                | 2-1-4-3-csc1g5-csc2g7-x-6-R                                                                           |
| 189485060      | Uncultured_Termite_group_1_bacterium_phylotype_Rs_D17_uid59059 | CAS-II                                                 | 9-9-1-2                                                                                               |
| 189485223      | Uncultured_Termite_group_1_bacterium_phylotype_Rs_D17_uid59059 | CAS-I-C                                                | 3-5-8c-7-4-1-2-9-1-2                                                                                  |
| 189485226      | Uncultured_Termite_group_1_bacterium_phylotype_Rs_D17_uid59059 | CAS-I-C                                                | 3-5-8c-7-4-1-2-9-1-2                                                                                  |

Received 27 March 2013  
doi:10.1042/BST20130038
